# Supplementary material for: A radical-mediated multicomponent cascade reaction for the synthesis of azide-biindole derivatives
Source: Royal Society of Chemistry journal article supplement (doi:10.1039/d1cc03853b), 2021-01-01
Supplement: d1cc03853b1.pdf [file d1cc03853b1.pdf]

## Support Information

# Radical-mediated multicomponent cascade reaction for the synthesis of azide-biindole derivatives

Xiaoyu Liu, Kun He, Na Gao, Peiyun Jiang, Jun Lin,\* and Yi Jin\*

†Key Laboratory of Medicinal Chemistry for Natural Resource, Ministry of Education; Yunnan Provincial Center for Research & Development of Natural Products; School of Chemical Science and Technology, Yunnan University, Kunming, 650091, P. R. China.

\* Corresponding author. Tel./fax: +86-871-65031633. E-mail: [jinyi@ynu.edu.cn](mailto:jinyi@ynu.edu.cn) (Y. Jin); [linjun@ynu.edu.cn](mailto:linjun@ynu.edu.cn) (J. Lin); [jinyi@ynu.edu.cn](mailto:jinyi@ynu.edu.cn) (Y. Jin).

## Contents

|                                                                                                    |    |
|----------------------------------------------------------------------------------------------------|----|
| 1. General information .....                                                                       | 3  |
| 2. General Procedure for preparing 3-azido-biindoles <b>3-4</b> and triazol product <b>8</b> ..... | 3  |
| 3. Spectroscopic Data of <b>3-8</b> .....                                                          | 5  |
| 4. Reaction Condition Optimizations .....                                                          | 24 |
| <b>Table S1.</b> Reaction Condition Optimizations <sup>a,c</sup> .....                             | 24 |
| 5. X-ray Structure and Data of <b>3a</b> .....                                                     | 26 |
| <b>Figure S1.</b> X-Ray crystal structure of <b>3a</b> .....                                       | 26 |
| <b>Table S2.</b> Crystal data and structure refinement for <b>3a</b> .....                         | 27 |
| 6. X-ray Structure and Data of <b>4p</b> .....                                                     | 28 |
| <b>Figure S2.</b> X-Ray crystal structure of <b>4p</b> .....                                       | 28 |
| <b>Table S3.</b> Crystal data and structure refinement for <b>4p</b> .....                         | 29 |
| 7. X-ray Structure and Data of <b>6</b> .....                                                      | 30 |

|                                                                             |    |
|-----------------------------------------------------------------------------|----|
| <b>Figure S3.</b> X-Ray crystal structure of <b>6</b> .....                 | 30 |
| <b>Table S4.</b> Crystal data and structure refinement for <b>6</b> .....   | 31 |
| 8. $^1\text{H}$ NMR and $^{13}\text{C}$ NMR Spectra of These Compounds..... | 32 |

## 1. General information

All chemicals and reagents were used of commercial grade and were used without no further purification. The reactions were monitored by thin-layer chromatography (TLC) using silica gel GF254. Column chromatography was performed with 200–300 mesh silica gel. All yields refer to isolated products after purification. The intermediates and the products synthesized were fully characterized by spectroscopic data. The NMR spectra were recorded on Bruker DRX-600 ( $^1\text{H}$ : 600 MHz,  $^{13}\text{C}$ : 151 MHz) using  $\text{DMSO-}d_6$  as solvents. The following abbreviation were used to explain the multiplicities: (s) = singlet, (d) = doublet, (t) = triplet, (q) = quartet, (sept) = septuplet, (dd) = double doublet, (dt) = double triplet, (dq) = double quartet, (ddd) = double-double doublet, (m) = multiplet; Chemical shifts ( $\delta$ ) are expressed in parts per million (ppm) and  $J$  values are given in hertz (Hz). IR spectra were recorded on an FT-IR Thermo Nicolet Avatar 360 using a KBr pellet. HRMS was performed on an Agilent LC/MSD TOF instrument. The melting points were measured by the XT-4A melting point apparatus without correction.

## 2. General Procedure for preparing 3-azido-biindoles **3-4** and triazol product **8**

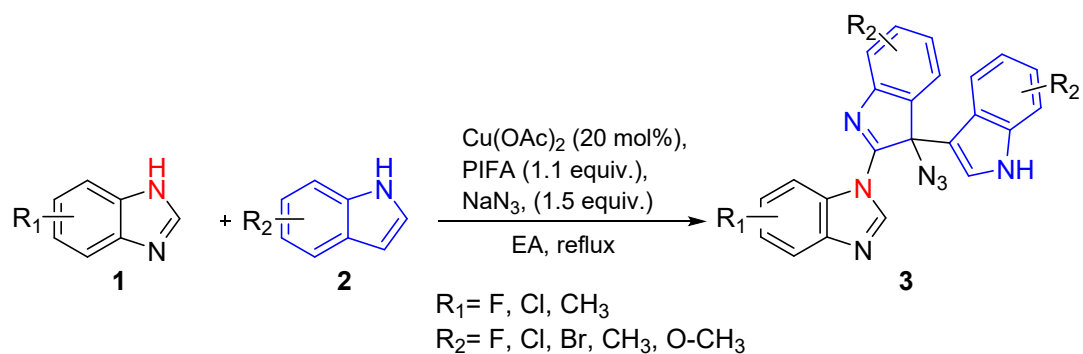

Under air atmosphere, benzimidazole **1** (1 mmol), indole **2** (2.2 mmol), PIFA (1.1 mmol, 473 mg),  $\text{Cu}(\text{OAc})_2$  (20 mol%, 36.2 mg),  $\text{NaN}_3$  (1.5 mmol, 97.5 mg) and EA (30 mL) were added to 100 mL reaction tube. The mixture was stirred at reflux temperature in oil bath for 5 h. After cooling to room temperature, the reaction was quenched with saturated NaCl solution and extracted with 60 mL EtOAc for three times. The organic layers were combined, dried over  $\text{Na}_2\text{SO}_4$ , filtered and evaporated under reduced pressure. The residues were purified by flash column chromatography

on silica gel to provide the products **3a-3s**. The products were further identified by FTIR spectroscopy, NMR spectroscopy, and HRMS.

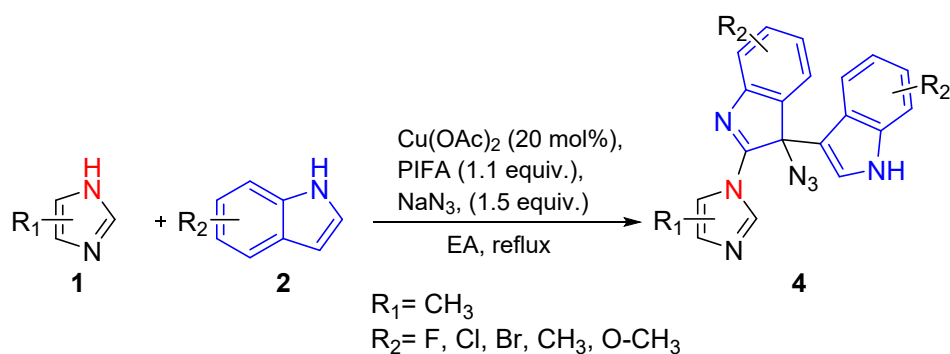

Under air atmosphere, imidazole **1** (1 mmol), indole **2** (2.2 mmol), PIFA (1.1 mmol, 473 mg),  $\text{Cu(OAc)}_2$  (20 mol%, 36.2 mg),  $\text{NaN}_3$  (1.5 mmol, 97.5 mg) and EA (30 mL) were added to 100 mL reaction tube. The mixture was stirred at reflux temperature in oil bath for 5 h. After cooling to room temperature, the reaction was quenched with saturated NaCl solution and extracted with 60 mL EtOAc for three times. The organic layers were combined, dried over  $\text{Na}_2\text{SO}_4$ , filtered and evaporated under reduced pressure. The residues were purified by flash column chromatography on silica gel to provide the products **4a-4q**. The products were further identified by FTIR spectroscopy, NMR spectroscopy, and HRMS.

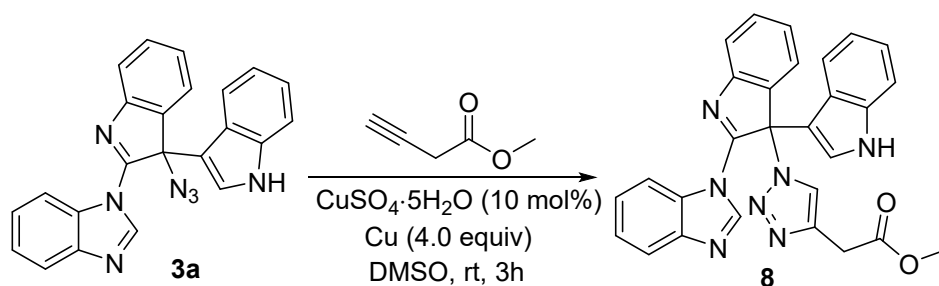

The reaction of 3-azido-biindole product **3a** (7.1 mmol, 2.76 g), methyl but-3-ynoate (8 mmol, 784 mg),  $\text{CuSO}_4 \cdot 5\text{H}_2\text{O}$  (10 mol%, 177.5 mg), and Cu powder (28.4 mmol, 1.8 g) were placed in a flame-dried Schlenk tube under air, followed by the addition of DMSO (80 mL). The reaction was conducted at room temperature for 3 h in dark place. After that, 120 mL water was added and the reaction was extracted by ethyl acetate. The crude product was purified by flash column chromatography on silica gel to afford the product **8** as reddish brown solid (3.17 g, 92%). The product **8** was

further identified by FTIR spectroscopy, NMR spectroscopy, and HRMS.

### 3. Spectroscopic Data of 3-8

#### 3'-Azido-2'-(1H-benzo[d]imidazol-1-yl)-1H,3'H-3,3'-biindole (**3a**)

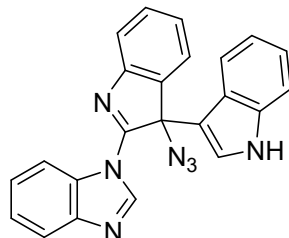

Reddish brown solid; Mp: 213.4 -214.1 °C; 295 mg, yield: 76%; **IR** (KBr): 3440, 2254, 2128, 1662, 826, 763, 633, 603, 550, 503, 454 cm<sup>-1</sup>; **<sup>1</sup>H NMR** (600 MHz, DMSO-*d*<sub>6</sub>) δ 11.56 (d, *J* = 2.9 Hz, 1H, NH), 8.65 (d, *J* = 8.2 Hz, 1H, ArH), 8.59 (s, 1H, ArH), 8.01 (d, *J* = 2.8 Hz, 1H, ArH), 7.83 (d, *J* = 7.7 Hz, 1H, ArH), 7.72 (d, *J* = 7.9 Hz, 1H, ArH), 7.56 (t, *J* = 7.0 Hz, 1H, ArH), 7.53 – 7.49 (m, 1H, ArH), 7.38 (dt, *J* = 19.4, 7.2 Hz, 3H, ArH), 7.30 (t, *J* = 7.4 Hz, 1H, ArH), 7.01 – 6.95 (m, 1H, ArH), 6.73 (t, *J* = 7.6 Hz, 1H, ArH), 6.64 (d, *J* = 8.2 Hz, 1H, ArH); **<sup>13</sup>C NMR** (151 MHz, DMSO-*d*<sub>6</sub>) δ 165.26, 151.96, 143.31, 141.51, 137.47, 136.03, 131.79, 131.71, 127.29, 126.03, 125.45, 125.19, 123.68, 123.35, 122.46, 121.39, 120.57, 120.24, 117.30, 116.38, 112.78, 109.16, 74.40. **HRMS** (ESI-TOF) *m/z*: [M + H]<sup>+</sup> calcd for C<sub>23</sub>H<sub>16</sub>N<sub>7</sub> 390.1462; Found 390.1459.

#### 3'-Azido-2'-(1H-benzo[d]imidazol-1-yl)-5,5'-dichloro-1H,3'H-3,3'-biindole (**3b**)

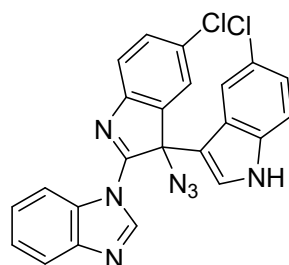

Reddish brown solid; Mp: 221.7 -222.9 °C; 310 mg, yield: 68%; **IR** (KBr): 3436, 2255, 2124, 1660, 1652, 824, 762, 649, 626, 618, 521, 508, 494 cm<sup>-1</sup>; **<sup>1</sup>H NMR** (600 MHz, DMSO-*d*<sub>6</sub>) δ 11.83 (d, *J* = 2.3 Hz, 1H, NH), 8.64 (d, *J* = 8.2 Hz, 1H, ArH), 8.56 (s, 1H, ArH), 8.07 (d, *J* = 2.8 Hz, 1H, ArH), 7.89 (d, *J* = 8.3 Hz, 1H, ArH), 7.76 (d, *J* = 7.9 Hz, 1H, ArH), 7.67 (dd, *J* = 8.3, 2.2 Hz, 1H, ArH), 7.56 (d, *J* = 7.2 Hz, 1H, ArH), 7.54 (d, *J* = 2.2 Hz, 1H, ArH), 7.45 (d, *J* = 7.7 Hz, 1H, ArH), 7.42 (d, *J* = 8.7 Hz, 1H, ArH), 7.05 (dd, *J* = 8.7, 2.1 Hz, 1H, ArH), 6.66 (s, 1H, ArH); **<sup>13</sup>C NMR** (151 MHz, DMSO-*d*<sub>6</sub>) δ 165.47, 150.65, 143.35, 141.48, 137.71, 135.96, 131.91, 131.71, 131.68, 127.41, 126.22, 125.68, 124.92, 124.22, 123.97, 122.86, 122.67, 120.69, 116.35, 116.30, 114.60, 108.21, 74.20. **HRMS** (ESI-TOF) *m/z*: [M + H]<sup>+</sup> calcd for C<sub>23</sub>H<sub>14</sub>Cl<sub>2</sub>N<sub>7</sub> 458.0682; Found 458.0680.

#### 3'-Azido-2'-(1H-benzo[d]imidazol-1-yl)-6,6'-dichloro-1H,3'H-3,3'-biindole (**3c**)

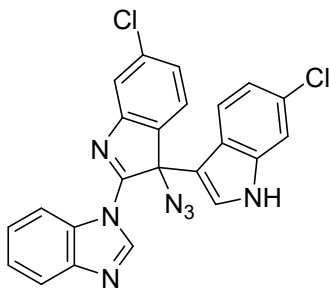

Reddish brown solid; Mp: 226.1 -226.6 °C; 320 mg, yield: 70%; **IR** (KBr): 3437, 2253, 2126, 1659, 823, 763, 625  $\text{cm}^{-1}$ ;  **$^1\text{H NMR}$**  (600 MHz,  $\text{DMSO-}d_6$ )  $\delta$  11.75 (s, 1H, NH), 8.65 (d,  $J = 8.2$  Hz, 1H, ArH), 8.60 (s, 1H, ArH), 8.07 (d,  $J = 2.8$  Hz, 1H, ArH), 7.97 (d,  $J = 1.9$  Hz, 1H, ArH), 7.78 (d,  $J = 7.9$  Hz, 1H, ArH), 7.57 (t,  $J = 7.2$  Hz, 1H, ArH), 7.48 – 7.44 (m, 3H, ArH), 7.41 (dd,  $J = 8.0, 1.9$  Hz, 1H, ArH), 6.87 (dd,  $J = 8.6, 2.0$  Hz, 1H, ArH), 6.70 (d,  $J = 8.7$  Hz, 1H, ArH);  **$^{13}\text{C NMR}$**  (151 MHz,  $\text{DMSO-}d_6$ )  $\delta$  166.44, 153.38, 143.37, 141.51, 137.90, 136.12, 134.58, 127.45, 127.12, 126.61, 126.19, 125.72, 125.01, 122.95, 122.03, 121.71, 120.87, 120.69, 118.57, 116.42, 112.50, 109.01, 73.88. **HRMS** (ESI-TOF)  $m/z$ :  $[\text{M} + \text{H}]^+$  calcd for  $\text{C}_{23}\text{H}_{14}\text{Cl}_2\text{N}_7$  458.0682; Found 458.0677.

3'-Azido-2'-(1H-benzo[d]imidazol-1-yl)-7,7'-dichloro-1H,3'H-3,3'-biindole (**3d**)

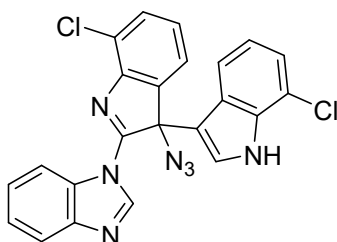

Reddish brown solid; Mp: 244.5 -245.3 °C; 233 mg, yield: 51%; **IR** (KBr): 3445, 2252, 2126, 1661, 824, 762, 624, 551, 500, 453  $\text{cm}^{-1}$ ;  **$^1\text{H NMR}$**  (600 MHz,  $\text{DMSO-}d_6$ )  $\delta$  12.05 (s, 1H, NH), 8.66 (d,  $J = 8.1$  Hz, 1H, ArH), 8.61 (s, 1H, ArH), 8.12 (d,  $J = 2.9$  Hz, 1H, ArH), 7.76 (d,  $J = 7.9$  Hz, 1H, ArH), 7.68 (d,  $J = 7.0$  Hz, 1H, ArH), 7.62 – 7.54 (m, 1H, ArH), 7.45 (t,  $J = 7.0$  Hz, 1H, ArH), 7.40 (d,  $J = 6.3$  Hz, 1H, ArH), 7.34 (t,  $J = 7.7$  Hz, 1H, ArH), 7.13 (d,  $J = 7.6$  Hz, 1H, ArH), 6.83 (t,  $J = 7.9$  Hz, 1H, ArH), 6.63 (d,  $J = 8.1$  Hz, 1H, ArH);  **$^{13}\text{C NMR}$**  (151 MHz,  $\text{DMSO-}d_6$ )  $\delta$  165.74, 148.64, 143.37, 141.52, 137.63, 134.32, 132.03, 131.71, 128.88, 126.87, 126.31, 125.79, 125.43, 125.10, 122.56, 122.22, 121.66, 120.72, 117.27, 116.39, 116.18, 109.99, 74.94. **HRMS** (ESI-TOF)  $m/z$ :  $[\text{M} + \text{H}]^+$  calcd for  $\text{C}_{23}\text{H}_{14}\text{Cl}_2\text{N}_7$  458.0682; Found 458.0677.

3'-Azido-2'-(1H-benzo[d]imidazol-1-yl)-5,5'-dibromo-1H,3'H-3,3'-biindole (**3e**)

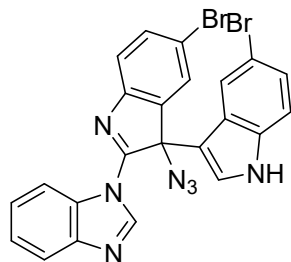

Reddish brown solid; Mp: 236.8 -237.4 °C; 344 mg, yield: 63%; **IR** (KBr): 3444, 2250, 2128, 1660, 829, 757, 621, 544, 486, 456, 414  $\text{cm}^{-1}$ ;  **$^1\text{H NMR}$**  (600 MHz,  $\text{DMSO-}d_6$ )  $\delta$  11.84 (d,  $J = 2.9$  Hz, 1H, NH), 8.64 (d,  $J = 8.2$  Hz, 1H, ArH), 8.54 (s, 1H, ArH), 8.05 (d,  $J = 2.8$  Hz, 1H, ArH), 7.86 – 7.77 (m, 2H, ArH), 7.75 (d,  $J = 7.9$  Hz, 1H, ArH), 7.64 (d,  $J = 1.9$  Hz, 1H, ArH), 7.55 (t,  $J = 7.7$  Hz, 1H, ArH), 7.44 (t,  $J = 7.0$  Hz, 1H, ArH), 7.37 (d,  $J = 8.7$  Hz, 1H, ArH), 7.15 (dd,  $J = 8.6, 1.9$  Hz, 1H, ArH), 6.82 (s, 1H, ArH);  **$^{13}\text{C NMR}$**  (151 MHz,  $\text{DMSO-}d_6$ )  $\delta$  165.35, 151.03, 143.34, 141.45, 137.95, 136.18, 134.83, 131.69, 127.22, 126.67, 126.24, 125.70, 125.21, 124.90, 123.27, 120.69, 119.74, 119.35, 116.34, 115.02, 112.89, 108.11, 74.16. **HRMS** (ESI-TOF)  $m/z$ :  $[\text{M} + \text{H}]^+$  calcd for  $\text{C}_{23}\text{H}_{14}\text{Br}_2\text{N}_7$  547.9651; Found 547.9654.

3'-Azido-2'-(1H-benzo[d]imidazol-1-yl)-6,6'-dibromo-1H,3'H-3,3'-biindole (**3f**)

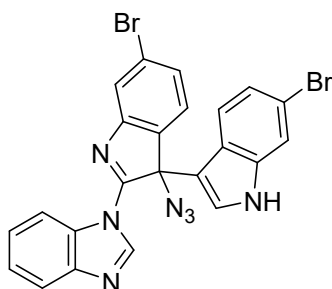

Reddish brown solid; Mp: 201.1 -201.8 °C; 338 mg, yield: 62%; **IR** (KBr): 3444, 2255, 2125, 1657, 823, 762, 701, 654, 630, 609, 592, 534, 510, 492  $\text{cm}^{-1}$ ;  **$^1\text{H NMR}$**  (600 MHz,  $\text{DMSO-}d_6$ )  $\delta$  11.73 (d,  $J = 2.5$  Hz, 1H, NH), 8.62 (d,  $J = 8.3$  Hz, 1H, ArH), 8.56 (s, 1H, ArH), 8.07 (d,  $J = 1.8$  Hz, 1H, ArH), 8.03 (d,  $J = 2.8$  Hz, 1H, ArH), 7.76 (d,  $J = 7.8$  Hz, 1H, ArH), 7.61 – 7.50 (m, 3H, ArH), 7.44 (t,  $J = 7.0$  Hz, 1H, ArH), 7.37 (d,  $J = 7.9$  Hz, 1H, ArH), 6.96 (dd,  $J = 8.6, 1.8$  Hz, 1H, ArH), 6.64 (d,  $J = 8.7$  Hz, 1H, ArH);  **$^{13}\text{C NMR}$**  (151 MHz,  $\text{DMSO-}d_6$ )  $\delta$  166.27, 153.46, 143.34, 141.46, 138.33, 134.98, 131.68, 130.03, 126.49, 126.19, 125.77, 125.72, 125.34, 124.50, 123.42, 122.26, 120.68, 118.92, 116.42, 115.46, 115.41, 108.97, 73.93. **HRMS** (ESI-TOF)  $m/z$ :  $[\text{M} + \text{H}]^+$  calcd for  $\text{C}_{23}\text{H}_{14}\text{Br}_2\text{N}_7$  547.9651; Found 547.9650.

3'-Azido-2'-(1H-benzo[d]imidazol-1-yl)-5,5'-difluoro-1H,3'H-3,3'-biindole (**3g**)

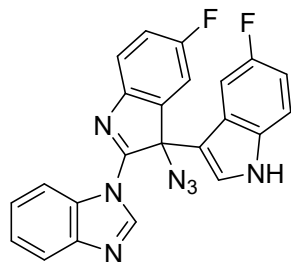

Reddish brown solid; Mp: 214.2 -214.7 °C; 272 mg, yield: 64%; **IR** (KBr): 3435, 2255, 2129, 1664, 825, 762, 700, 668, 623, 547, 541, 511, 451 cm<sup>-1</sup>; **<sup>1</sup>H NMR** (600 MHz, DMSO-*d*<sub>6</sub>) δ 11.73 (s, 1H, NH), 8.63 (d, *J* = 8.3 Hz, 1H, ArH), 8.59 (s, 1H, ArH), 8.07 (d, *J* = 2.9 Hz, 1H, ArH), 7.89 (dd, *J* = 8.5, 4.4 Hz, 1H, ArH), 7.75 (d, *J* = 7.9 Hz, 1H, ArH), 7.60 – 7.50 (m, 1H, ArH), 7.47 – 7.37 (m, 4H, ArH), 6.92 (dtd, *J* = 28.1, 9.2, 2.5 Hz, 1H, ArH), 6.35 (d, *J* = 7.6 Hz, 1H, ArH); **<sup>13</sup>C NMR** (151 MHz, DMSO-*d*<sub>6</sub>) δ 165.50, 161.82 (d, *J* = 243 Hz), 157.81 (d, *J* = 232.5 Hz), 148.40, 143.71, 141.87, 138.21, 134.53, 132.11, 127.91, 126.53, 125.95, 123.77 (d, *J* = 10.5 Hz), 123.17 (d, *J* = 9 Hz), 121.04, 118.75, (d, *J* = 24 Hz), 116.70, 114.61 (d, *J* = 10.5 Hz), 112.26 (d, *J* = 25.5 Hz), 111.33 (d, *J* = 25.5 Hz), 109.07 (d, *J* = 4.5 Hz), 102.38 (d, *J* = 25.5 Hz), 74.77; **<sup>19</sup>F NMR** (565 MHz, DMSO-*d*<sub>6</sub>) δ -124.27, -125.17. **HRMS** (ESI-TOF) *m/z*: [M + H]<sup>+</sup> calcd for C<sub>23</sub>H<sub>14</sub>F<sub>2</sub>N<sub>7</sub> 426.1273; Found 426.1265.

3'-Azido-2'-(1H-benzo[d]imidazol-1-yl)-6,6'-difluoro-1H,3'H-3,3'-biindole (**3h**)

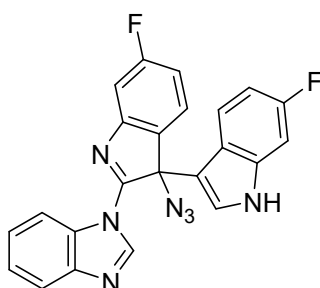

Reddish brown solid; Mp: 250.8 -252.1 °C; 255 mg, yield: 60%; **IR** (KBr): 3437, 2257, 2128, 1663, 824, 762, 665, 618, 535, 512, 463, 426 cm<sup>-1</sup>; **<sup>1</sup>H NMR** (600 MHz, DMSO-*d*<sub>6</sub>) δ 11.65 (s, 1H, NH), 8.62 (d, *J* = 8.2 Hz, 1H, ArH), 8.60 (s, 1H, ArH), 8.02 (d, *J* = 2.7 Hz, 1H, ArH), 7.80 – 7.70 (m, 2H, ArH), 7.59 – 7.52 (m, 1H, ArH), 7.48 – 7.40 (m, 2H, ArH), 7.16 (td, *J* = 9.2, 8.5, 4.3 Hz, 2H, ArH), 6.69 (td, *J* = 9.3, 2.4 Hz, 1H, ArH), 6.63 (dd, *J* = 8.9, 5.2 Hz, 1H, ArH); **<sup>13</sup>C NMR** (151 MHz, DMSO-*d*<sub>6</sub>) δ 166.80, 164.45 (d, *J* = 244.5 Hz), 159.46 (d, *J* = 235.5 Hz), 153.82 (d, *J* = 12 Hz), 143.34, 141.46, 137.53 (d, *J* = 13.5 Hz), 131.78 (d, *J* = 24 Hz), 126.17, 126.12, 125.68, 125.14 (d, *J* = 10.5 Hz), 120.67, 120.11, 118.32 (d, *J* = 10.5 Hz), 116.41, 113.72 (d, *J* = 22.5 Hz), 109.54 (d, *J* = 24 Hz), 109.21, 109.18, 109.01, 98.87 (d, *J* = 22.5 Hz), 73.83; **<sup>19</sup>F NMR** (565 MHz, DMSO-*d*<sub>6</sub>) δ -109.13, -120.30. **HRMS** (ESI-TOF) *m/z*: [M + H]<sup>+</sup> calcd for C<sub>23</sub>H<sub>14</sub>F<sub>2</sub>N<sub>7</sub> 426.1273; Found 426.1268.

3'-Azido-2'-(1H-benzo[d]imidazol-1-yl)-7,7'-dimethyl-1H,3'H-3,3'-biindole (**3i**)



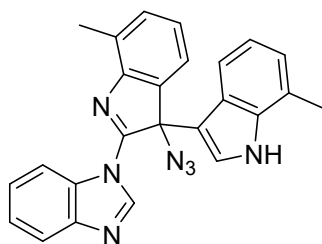

Reddish brown solid; Mp: 204.7 -205.3 °C; 200 mg, yield: 48%; **IR** (KBr): 3444, 2252, 2125, 1666, 822, 769, 625, 583 cm<sup>-1</sup>; **<sup>1</sup>H NMR** (600 MHz, DMSO-*d*<sub>6</sub>) δ 11.53 (s, 1H, NH), 8.69 (d, *J* = 8.2 Hz, 1H, ArH), 8.59 (s, 1H, ArH), 7.99 (d, *J* = 2.9 Hz, 1H, ArH), 7.73 (d, *J* = 7.9 Hz, 1H, ArH), 7.54 (t, *J* = 7.8 Hz, 1H, ArH), 7.44 – 7.41 (m, 1H, ArH), 7.40 (d, *J* = 3.3 Hz, 1H, ArH), 7.20 (t, *J* = 7.4 Hz, 1H, ArH), 7.16 (d, *J* = 7.3 Hz, 1H, ArH), 6.79 (d, *J* = 7.1 Hz, 1H, ArH), 6.64 (t, *J* = 7.6 Hz, 1H, ArH), 6.46 (d, *J* = 8.1 Hz, 1H, ArH), 2.71 (s, 3H, CH<sub>3</sub>), 2.40 (s, 3H, CH<sub>3</sub>); **<sup>13</sup>C NMR** (151 MHz, DMSO-*d*<sub>6</sub>) δ 164.24, 150.26, 143.31, 141.47, 136.96, 135.86, 132.81, 131.85, 130.79, 127.10, 126.01, 125.38, 124.76, 123.13, 122.91, 122.07, 121.00, 120.52, 120.45, 116.39, 114.94, 109.76, 74.70, 17.09, 16.76. **HRMS** (ESI-TOF) *m/z*: [M + H]<sup>+</sup> calcd for C<sub>25</sub>H<sub>20</sub>N<sub>7</sub> 418.1775; Found 418.1770.

3'-Azido-2'-(1H-benzo[d]imidazol-1-yl)-5,5'-dimethoxy-1H,3'H-3,3'-biindole (**3j**)

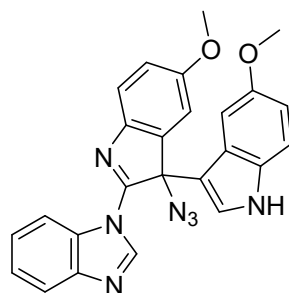

Reddish brown solid; Mp: 248.9 -250.2 °C; 296 mg, yield: 66%; **IR** (KBr): 3655, 3442, 2258, 2122, 2001, 1660, 1220, 824, 768, 626, 566, 554, 499, 420 cm<sup>-1</sup>; **<sup>1</sup>H NMR** (600 MHz, DMSO-*d*<sub>6</sub>) δ 11.45 (s, 1H, NH), 8.67 (d, *J* = 8.2 Hz, 1H, ArH), 8.62 (s, 1H, ArH), 7.99 (s, 1H, ArH), 7.82 (d, *J* = 8.5 Hz, 1H, ArH), 7.78 (d, *J* = 8.0 Hz, 1H, ArH), 7.57 (t, *J* = 7.8 Hz, 1H, ArH), 7.46 (t, *J* = 7.7 Hz, 1H, ArH), 7.30 (d, *J* = 8.6 Hz, 1H, ArH), 7.17 (d, *J* = 7.3 Hz, 1H, ArH), 7.01 (s, 1H, ArH), 6.71 (d, *J* = 8.9 Hz, 1H, ArH), 6.13 (s, 1H, ArH), 3.81 (s, 3H, CH<sub>3</sub>), 3.44 (s, 3H, CH<sub>3</sub>); **<sup>13</sup>C NMR** (151 MHz, DMSO-*d*<sub>6</sub>) δ 163.56, 159.04, 153.91, 145.03, 143.27, 141.39, 137.58, 132.50, 131.78, 125.87, 125.71, 125.26, 123.76, 121.95, 120.53, 116.13, 115.82, 113.45, 111.93, 110.46, 108.67, 99.61, 74.50, 56.26, 55.40. **HRMS** (ESI-TOF) *m/z*: [M + H]<sup>+</sup> calcd for C<sub>25</sub>H<sub>20</sub>N<sub>7</sub>O<sub>2</sub> 450.1673; Found 450.1665.

3'-Azido-2'-(5-fluoro-1H-benzo[d]imidazol-1-yl)-1H,3'H-3,3'-biindole (**3k**)

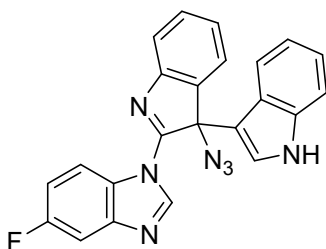

Reddish brown solid; Mp: 265.3 -266.6 °C; 260 mg, yield: 64%; **IR** (KBr): 3447, 2255, 2129, 1659, 1453, 828, 729, 620, 546, 517, 491, 451  $\text{cm}^{-1}$ ; **<sup>1</sup>H NMR** (600 MHz,  $\text{DMSO-}d_6$ )  $\delta$  11.58 (s, 1H, NH), 8.60 (s, 1H, ArH), 8.41 (dd,  $J = 9.1, 2.6$  Hz, 1H, ArH), 8.02 (d,  $J = 2.8$  Hz, 1H, ArH), 7.87 (d,  $J = 7.8$  Hz, 1H, ArH), 7.76 (dd,  $J = 8.7, 4.9$  Hz, 1H, ArH), 7.59 (t,  $J = 7.7$  Hz, 1H, ArH), 7.38 (t,  $J = 8.5$  Hz, 2H, ArH), 7.35 – 7.27 (m, 2H, ArH), 7.01 (t,  $J = 7.6$  Hz, 1H, ArH), 6.75 (t,  $J = 7.6$  Hz, 1H, ArH), 6.64 (d,  $J = 8.2$  Hz, 1H, ArH); **<sup>13</sup>C NMR** (151 MHz,  $\text{DMSO-}d_6$ )  $\delta$  165.16, 160.62 (d,  $J = 238.5$  Hz), 151.71, 142.12, 139.84, 138.86, 137.46, 135.96, 131.74, 127.46, 125.28, 123.68, 123.30 (d,  $J = 10.5$  Hz), 122.49, 121.74 (d,  $J = 10.5$  Hz), 121.56, 120.29, 117.31, 113.37 (d,  $J = 24$  Hz), 112.80, 108.89, 103.31 (d,  $J = 28.5$  Hz), 74.32; **<sup>19</sup>F NMR** (565 MHz,  $\text{DMSO-}d_6$ )  $\delta$  -115.38. **HRMS** (ESI-TOF)  $m/z$ :  $[\text{M} + \text{H}]^+$  calcd for  $\text{C}_{23}\text{H}_{15}\text{FN}_7$  408.1367; Found 408.1361.

3'-Azido-5,5'-dichloro-2'-(5-fluoro-1H-benzo[d]imidazol-1-yl)-1H,3'H-3,3'-biindole  
(**3l**)

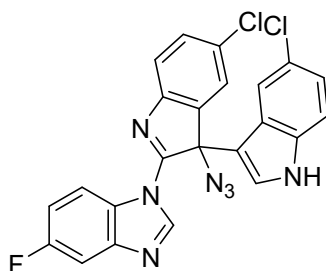

Reddish brown solid; Mp: 244.4 -245.3 °C; 280 mg, yield: 59%; **IR** (KBr): 3442, 2259, 2127, 1660, 1478, 824, 763, 622, 553, 516, 453  $\text{cm}^{-1}$ ; **<sup>1</sup>H NMR** (600 MHz,  $\text{DMSO-}d_6$ )  $\delta$  11.86 (d,  $J = 2.3$  Hz, 1H, NH), 8.62 (s, 1H, ArH), 8.63 – 8.61 (m, 1H, ArH), 8.08 (d,  $J = 2.8$  Hz, 1H, ArH), 7.87 (d,  $J = 8.3$  Hz, 1H, ArH), 7.65 (dd,  $J = 8.3, 2.1$  Hz, 1H, ArH), 7.62 (dd,  $J = 9.0, 2.6$  Hz, 1H, ArH), 7.54 (d,  $J = 2.1$  Hz, 1H, ArH), 7.44 – 7.37 (m, 2H, ArH), 7.04 (dd,  $J = 8.7, 2.1$  Hz, 1H, ArH), 6.65 (s, 1H, ArH); **<sup>13</sup>C NMR** (151 MHz,  $\text{DMSO-}d_6$ )  $\delta$  165.23, 159.55, 150.44, 143.18, 137.70, 135.94, 131.93, 131.80, 128.34, 127.48, 124.92, 124.18, 124.00, 122.91, 122.67, 117.29 (d,  $J = 10.5$  Hz), 116.27, 114.61, 114.05, 113.88, 108.09, 106.96 (d,  $J = 24$  Hz), 74.04; **<sup>19</sup>F NMR** (565 MHz,  $\text{DMSO-}d_6$ )  $\delta$  -116.74. **HRMS** (ESI-TOF)  $m/z$ :  $[\text{M} + \text{H}]^+$  calcd for  $\text{C}_{23}\text{H}_{13}\text{Cl}_2\text{FN}_7$  476.0588; Found 476.0583.

3'-Azido-6,6'-dichloro-2'-(5-fluoro-1H-benzo[d]imidazol-1-yl)-1H,3'H-3,3'-biindole  
(**3m**)

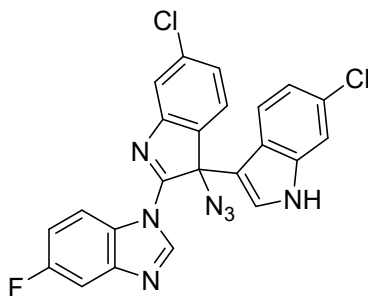

Reddish brown solid; Mp: 249.1 -249.5 °C; 285 mg, yield: 60%; **IR** (KBr): 3442, 2255, 2126, 1651, 823, 763, 624, 585, 533, 486, 434  $\text{cm}^{-1}$ ;  **$^1\text{H NMR}$**  (600 MHz,  $\text{DMSO-}d_6$ )  $\delta$  11.74 (s, 1H, NH), 8.56 (s, 1H, ArH), 8.38 (dd,  $J = 9.1, 2.6$  Hz, 1H, ArH), 8.04 (d,  $J = 2.8$  Hz, 1H, ArH), 7.97 (d,  $J = 1.9$  Hz, 1H, ArH), 7.78 (dd,  $J = 8.7, 4.8$  Hz, 1H, ArH), 7.47 – 7.40 (m, 2H, ArH), 7.39 (dd,  $J = 7.9, 1.9$  Hz, 1H, ArH), 7.31 (td,  $J = 9.1, 2.6$  Hz, 1H, ArH), 6.85 (dd,  $J = 8.7, 1.9$  Hz, 1H, ArH), 6.69 (d,  $J = 8.7$  Hz, 1H, ArH);  **$^{13}\text{C NMR}$**  (151 MHz,  $\text{DMSO-}d_6$ )  $\delta$  166.33, 159.89, 153.12, 142.07, 139.89, 137.90, 136.15, 134.51, 132.00, 127.48, 127.27, 126.68, 125.00, 122.01, 121.91, 120.90, 118.60, 113.67, 113.51, 112.50, 108.76, 103.47 (d,  $J = 30$  Hz), 73.81;  **$^{19}\text{F NMR}$**  (565 MHz,  $\text{DMSO-}d_6$ )  $\delta$  -115.19. **HRMS** (ESI-TOF)  $m/z$ :  $[\text{M} + \text{H}]^+$  calcd for  $\text{C}_{23}\text{H}_{13}\text{Cl}_2\text{FN}_7$  476.0588; Found 476.0586.

3'-Azido-7,7'-dichloro-2'-(5-fluoro-1H-benzo[d]imidazol-1-yl)-1H,3'H-3,3'-biindole  
(**3n**)

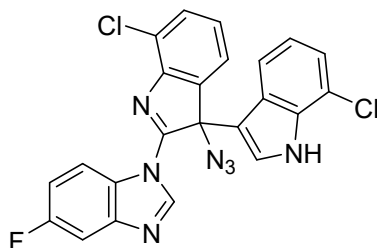

Reddish brown solid; Mp: 277.3 -278.5 °C; 247 mg, yield: 52%; **IR** (KBr): 3447, 2252, 2126, 1666, 826, 766, 624, 590, 529, 501, 479  $\text{cm}^{-1}$ ;  **$^1\text{H NMR}$**  (600 MHz,  $\text{DMSO-}d_6$ )  $\delta$  12.06 (d,  $J = 2.9$  Hz, 1H, NH), 8.62 (s, 1H, ArH), 8.39 (dd,  $J = 9.0, 2.7$  Hz, 1H, ArH), 8.12 (d,  $J = 2.9$  Hz, 1H, ArH), 7.80 (dd,  $J = 8.8, 4.8$  Hz, 1H, ArH), 7.69 (dd,  $J = 8.1, 1.1$  Hz, 1H, ArH), 7.41 (dd,  $J = 7.4, 1.1$  Hz, 1H, ArH), 7.39 – 7.31 (m, 2H, ArH), 7.14 (d,  $J = 6.9$  Hz, 1H, ArH), 6.85 (t,  $J = 7.9$  Hz, 1H, ArH), 6.64 (d,  $J = 8.2$  Hz, 1H, ArH);  **$^{13}\text{C NMR}$**  (151 MHz,  $\text{DMSO-}d_6$ )  $\delta$  165.67, 160.67 (d,  $J = 238.5$  Hz), 148.36, 142.16, 139.90, 137.56, 134.31, 132.05, 131.95 (d,  $J = 30$  Hz), 129.08, 126.96, 125.55, 125.08, 122.58, 122.24, 121.94 (d,  $J = 9$  Hz), 121.72, 117.27, 116.23, 113.68 (d,  $J = 25.5$  Hz), 109.71, 103.37 (d,  $J = 30$  Hz), 74.88;  **$^{19}\text{F NMR}$**  (565 MHz,  $\text{DMSO-}d_6$ )  $\delta$  -114.95. **HRMS** (ESI-TOF)  $m/z$ :  $[\text{M} + \text{H}]^+$  calcd for  $\text{C}_{23}\text{H}_{13}\text{Cl}_2\text{FN}_7$  476.0588; Found 476.0582.

3'-Azido-5,5'-dibromo-2'-(5-fluoro-1H-benzo[d]imidazol-1-yl)-1H,3'H-3,3'-biindole  
(**3o**)

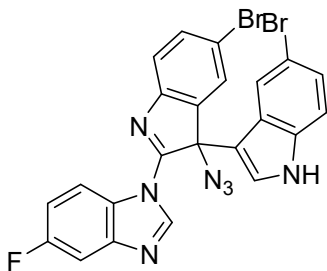

Reddish brown solid; Mp: 269.8 -270.6 °C; 315 mg, yield: 56%; **IR** (KBr): 3442, 2253, 2127, 1660, 1478, 826, 763, 622, 553, 516, 455  $\text{cm}^{-1}$ ;  **$^1\text{H NMR}$**  (600 MHz,  $\text{DMSO-}d_6$ )  $\delta$  11.83 (s, 1H, NH), 8.63 (dd,  $J = 9.0, 4.9$  Hz, 1H, ArH), 8.59 (s, 1H, ArH), 8.04 (d,  $J = 2.8$  Hz, 1H, ArH), 7.85 – 7.76 (m, 2H, ArH), 7.67 – 7.59 (m, 2H, ArH), 7.42 (tt,  $J = 9.1, 2.6$  Hz, 1H, ArH), 7.37 (d,  $J = 8.6$  Hz, 1H, ArH), 7.16 (dd,  $J = 8.4, 2.0$  Hz, 1H, ArH), 6.81 (s, 1H, ArH);  **$^{13}\text{C NMR}$**  (151 MHz,  $\text{DMSO-}d_6$ )  $\delta$  165.14, 160.39 (d,  $J = 238.5$  Hz), 150.85, 144.19 (d,  $J = 13.5$  Hz), 143.16, 137.98, 136.17, 134.87, 128.37, 127.31, 126.71, 125.21, 124.89, 123.34, 119.88, 119.35, 117.30 (d,  $J = 9$  Hz), 115.03, 114.00 (d,  $J = 24$  Hz), 112.89, 107.99, 106.99 (d,  $J = 25.5$  Hz), 74.06;  **$^{19}\text{F NMR}$**  (565 MHz,  $\text{DMSO-}d_6$ )  $\delta$  -116.74. **HRMS** (ESI-TOF)  $m/z$ :  $[\text{M} + \text{H}]^+$  calcd for  $\text{C}_{23}\text{H}_{13}\text{Br}_2\text{FN}_7$  565.9557; Found 565.9553.

3'-Azido-5,5'-dichloro-2'-(5-chloro-1H-benzo[d]imidazol-1-yl)-1H,3'H-3,3'-biindole (**3p**)

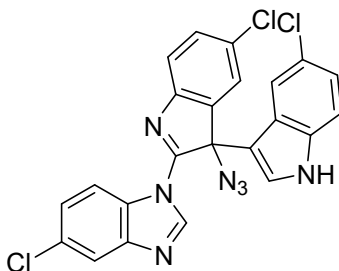

Reddish brown solid; Mp: 255.2 -256.5 °C; 324 mg, yield: 66%; **IR** (KBr): 3439, 2243, 2124, 1656. 829, 759, 617, 571, 527  $\text{cm}^{-1}$ ;  **$^1\text{H NMR}$**  (600 MHz,  $\text{DMSO-}d_6$ )  $\delta$  11.83 (d,  $J = 2.9$  Hz, 1H, NH), 8.61 (t,  $J = 4.4$  Hz, 2H, ArH), 8.06 (d,  $J = 2.8$  Hz, 1H, ArH), 7.88 (d,  $J = 8.3$  Hz, 1H, ArH), 7.85 (d,  $J = 2.1$  Hz, 1H, ArH), 7.67 (dd,  $J = 8.3, 2.2$  Hz, 1H, ArH), 7.59 (dd,  $J = 8.7, 2.2$  Hz, 1H, ArH), 7.55 (d,  $J = 2.1$  Hz, 1H, ArH), 7.41 (d,  $J = 8.7$  Hz, 1H, ArH), 7.05 (dd,  $J = 8.7, 2.1$  Hz, 1H, ArH), 6.66 (d,  $J = 2.0$  Hz, 1H, ArH);  **$^{13}\text{C NMR}$**  (151 MHz,  $\text{DMSO-}d_6$ )  $\delta$  165.28, 150.39, 144.36, 142.94, 137.72, 135.96, 131.94, 131.90, 130.58, 129.98, 127.49, 126.29, 124.96, 124.21, 124.00, 122.97, 122.68, 120.38, 117.53, 116.31, 114.61, 107.99, 74.13. **HRMS** (ESI-TOF)  $m/z$ :  $[\text{M} + \text{H}]^+$  calcd for  $\text{C}_{23}\text{H}_{13}\text{Cl}_3\text{N}_7$  492.0293; Found 492.0284.

3'-Azido-6,6'-dichloro-2'-(5-chloro-1H-benzo[d]imidazol-1-yl)-1H,3'H-3,3'-biindole (**3q**)

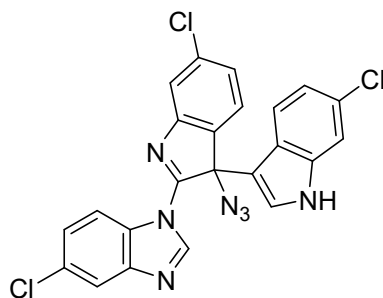

Reddish brown solid; Mp: 272.3 -273.7 °C; 299 mg, yield: 61%; **IR** (KBr): 3441, 2269, 2136, 1656, 1497, 1455, 821, 764, 578, 529, 495, 484, 447  $\text{cm}^{-1}$ ;  **$^1\text{H NMR}$**  (600 MHz,  $\text{DMSO-}d_6$ )  $\delta$  11.73 (d,  $J = 2.8$  Hz, 1H, NH), 8.65 (d,  $J = 2.1$  Hz, 1H, ArH), 8.59 (s, 1H, ArH), 8.04 (d,  $J = 2.8$  Hz, 1H, ArH), 8.02 (d,  $J = 1.9$  Hz, 1H, ArH), 7.77 (d,  $J = 8.5$  Hz, 1H, ArH), 7.48 (dd,  $J = 8.5, 2.1$  Hz, 1H, ArH), 7.43 (d,  $J = 8.1$  Hz, 2H, ArH), 7.39 (dd,  $J = 7.9, 1.9$  Hz, 1H, ArH), 6.85 (dd,  $J = 8.7, 1.9$  Hz, 1H, ArH), 6.70 (d,  $J = 8.7$  Hz, 1H, ArH);  **$^{13}\text{C NMR}$**  (151 MHz,  $\text{DMSO-}d_6$ )  $\delta$  166.28, 153.06, 142.33, 142.19, 137.90, 136.18, 134.52, 132.38, 130.55, 127.47, 127.32, 126.70, 125.97, 124.98, 122.06, 122.02, 121.99, 120.92, 118.64, 116.20, 112.49, 108.75, 73.81. **HRMS** (ESI-TOF)  $m/z$ :  $[\text{M} + \text{H}]^+$  calcd for  $\text{C}_{23}\text{H}_{13}\text{Cl}_3\text{N}_7$  492.0293; Found 492.0287.

3'-Azido-5,5'-dibromo-2'-(5-chloro-1H-benzo[d]imidazol-1-yl)-1H,3'H-3,3'-biindole (**3r**)

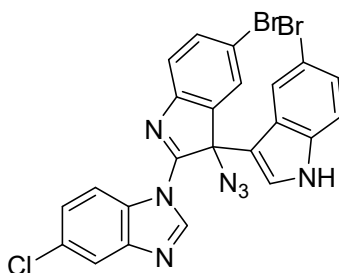

Reddish brown solid; Mp: 240.6 -241.4 °C; 346 mg, yield: 60%; **IR** (KBr): 3443, 2364, 2254, 2127, 1659, 1461, 821, 769, 625, 546, 455, 430  $\text{cm}^{-1}$ ;  **$^1\text{H NMR}$**  (600 MHz,  $\text{DMSO-}d_6$ )  $\delta$  11.84 (d,  $J = 2.9$  Hz, 1H, NH), 8.61 (s, 1H, ArH), 8.60 (s, 1H, ArH), 8.04 (d,  $J = 2.8$  Hz, 1H, ArH), 7.85 – 7.81 (m, 1H, ArH), 7.79 (dd,  $J = 10.0, 8.1$  Hz, 1H, ArH), 7.64 (dd,  $J = 8.7, 2.0$  Hz, 1H, ArH), 7.57 (dd,  $J = 8.8, 2.1$  Hz, 1H, ArH), 7.36 (d,  $J = 8.7$  Hz, 1H, ArH), 7.14 (dd,  $J = 8.6, 1.9$  Hz, 1H, ArH), 6.87 (d,  $J = 8.3$  Hz, 1H, ArH), 6.81 (s, 1H, ArH);  **$^{13}\text{C NMR}$**  (151 MHz,  $\text{DMSO-}d_6$ )  $\delta$  165.15, 159.42, 150.79, 144.38, 142.94, 140.53, 137.97, 136.19, 134.86, 130.00, 127.35, 126.71, 126.28, 125.22, 123.37, 120.38, 119.96, 119.39, 117.52, 115.01, 112.92, 107.89, 74.10. **HRMS** (ESI-TOF)  $m/z$ :  $[\text{M} + \text{H}]^+$  calcd for  $\text{C}_{23}\text{H}_{13}\text{Br}_2\text{ClN}_7$  579.9282; Found 579.9284.

3'-Azido-6,6'-dichloro-2'-(5,6-dimethyl-1H-benzo[d]imidazol-1-yl)-1H,3'H-3,3'-biindole (**3s**)

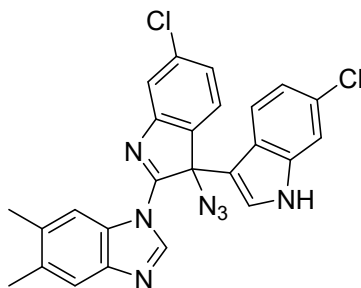

Reddish brown solid; Mp: 229.6 -231.2 °C; 227 mg, yield: 47%; **IR** (KBr): 3448, 2269, 2129, 1662, 829, 768, 626, 550, 511, 422 cm<sup>-1</sup>; **<sup>1</sup>H NMR** (600 MHz, DMSO-*d*<sub>6</sub>) δ 11.73 (s, 1H, NH), 8.42 (s, 1H, ArH), 8.39 (s, 1H, ArH), 8.03 (d, *J* = 2.7 Hz, 1H, ArH), 7.94 (d, *J* = 1.7 Hz, 1H, ArH), 7.51 (s, 1H, ArH), 7.45 – 7.39 (m, 2H, ArH), 7.38 – 7.34 (m, 1H, ArH), 6.84 (dd, *J* = 8.6, 1.8 Hz, 1H, ArH), 6.66 (d, *J* = 8.7 Hz, 1H, ArH), 2.41 (s, 3H, CH<sub>3</sub>), 2.33 (s, 3H, CH<sub>3</sub>); **<sup>13</sup>C NMR** (151 MHz, DMSO-*d*<sub>6</sub>) δ 166.33, 153.51, 141.84, 140.62, 137.88, 136.09, 134.98, 134.54, 134.37, 130.02, 127.44, 126.91, 126.45, 124.95, 122.02, 121.60, 120.85, 120.70, 118.54, 116.47, 112.48, 109.19, 73.81, 20.65, 20.22. **HRMS** (ESI-TOF) *m/z*: [M - H]<sup>-</sup> calcd for C<sub>25</sub>H<sub>18</sub>Cl<sub>2</sub>N<sub>7</sub> 484.0850; Found 484.0847.

3'-Azido-2'-(1H-imidazol-1-yl)-1H,3'H-3,3'-biindole (**4a**)

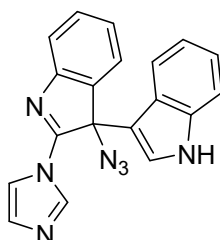

Reddish brown solid; Mp: 142.9 -144.2 °C; 247 mg, yield: 73%; **IR** (KBr): 3448, 2256, 2121, 1655, 1452, 1307, 829, 767, 667, 626, 575, 511, 453, 424 cm<sup>-1</sup>; **<sup>1</sup>H NMR** (600 MHz, Acetone-*d*<sub>6</sub>) δ 10.67 (s, 1H, NH), 8.11 (s, 1H, ArH), 7.76 (d, *J* = 2.7 Hz, 1H, ArH), 7.64 (t, *J* = 1.5 Hz, 1H, ArH), 7.58 (d, *J* = 7.7 Hz, 1H, ArH), 7.41 (td, *J* = 7.6, 1.3 Hz, 1H, ArH), 7.28 (d, *J* = 8.2 Hz, 1H, ArH), 7.23 (d, *J* = 6.2 Hz, 1H, ArH), 7.17 (td, *J* = 7.5, 1.0 Hz, 1H, ArH), 6.94 – 6.89 (m, 1H, ArH), 6.87 (d, *J* = 1.6 Hz, 1H, ArH), 6.72 – 6.62 (m, 2H, ArH); **<sup>13</sup>C NMR** (151 MHz, Acetone-*d*<sub>6</sub>) δ 164.53, 151.60, 137.50, 136.81, 136.21, 131.09, 130.23, 126.90, 124.20, 123.43, 123.37, 122.35, 120.95, 119.92, 117.50, 116.72, 112.14, 109.23, 73.91. **HRMS** (ESI-TOF) *m/z*: [M + H]<sup>+</sup> calcd for C<sub>19</sub>H<sub>14</sub>N<sub>7</sub> 340.1305; Found 340.1302.

3'-Azido-6,6'-dichloro-2'-(1H-imidazol-1-yl)-1H,3'H-3,3'-biindole (**4b**)

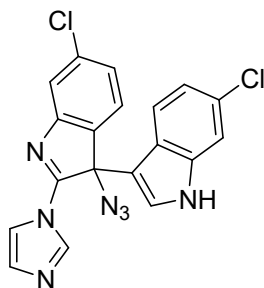

Reddish brown solid; Mp: 202.7 -203.4 °C; 260 mg, yield: 64%; **IR** (KBr): 3448, 2248, 2117, 1648, 826, 769, 630, 568, 534, 480, 435, 412  $\text{cm}^{-1}$ ;  **$^1\text{H NMR}$**  (600 MHz,  $\text{DMSO-}d_6$ )  $\delta$  11.72 (d,  $J = 2.8$  Hz, 1H, NH), 8.30 (s, 1H, ArH), 7.98 (d,  $J = 2.7$  Hz, 1H, ArH), 7.86 (d,  $J = 1.6$  Hz, 1H, ArH), 7.76 (s, 1H, ArH), 7.44 (d,  $J = 1.9$  Hz, 1H, ArH), 7.41 – 7.36 (m, 2H, ArH), 7.15 – 7.06 (m, 1H, ArH), 6.89 (dd,  $J = 8.6, 1.9$  Hz, 1H, ArH), 6.62 (d,  $J = 8.6$  Hz, 1H, ArH);  **$^{13}\text{C NMR}$**  (151 MHz,  $\text{DMSO-}d_6$ )  $\delta$  165.70, 152.70, 137.84, 136.75, 136.11, 135.38, 131.09, 127.41, 126.71, 125.12, 122.05, 121.75, 120.83, 118.67, 117.43, 116.59, 112.48, 108.31, 73.23. **HRMS** (ESI-TOF)  $m/z$ :  $[\text{M} + \text{H}]^+$  calcd for  $\text{C}_{19}\text{H}_{12}\text{Cl}_2\text{N}_7$  408.0526; Found 408.0520.

3'-Azido-6,6'-dibromo-2'-(1H-imidazol-1-yl)-1H,3'H-3,3'-biindole (**4c**)

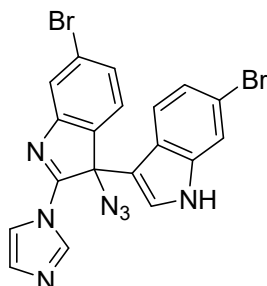

Reddish brown solid; Mp: 191.3 -192.5 °C; 292 mg, yield: 59%; **IR** (KBr): 3448, 2259, 2124, 1658, 1306, 828, 769, 630, 544, 513, 455, 422  $\text{cm}^{-1}$ ;  **$^1\text{H NMR}$**  (600 MHz,  $\text{DMSO-}d_6$ )  $\delta$  11.76 (d,  $J = 2.8$  Hz, 1H, NH), 8.33 (d,  $J = 1.1$  Hz, 1H, ArH), 8.03 (d,  $J = 1.8$  Hz, 1H, ArH), 8.00 (d,  $J = 2.7$  Hz, 1H, ArH), 7.80 (t,  $J = 1.5$  Hz, 1H, ArH), 7.63 (d,  $J = 1.8$  Hz, 1H, ArH), 7.57 (dd,  $J = 7.9, 1.8$  Hz, 1H, ArH), 7.37 (d,  $J = 7.9$  Hz, 1H, ArH), 7.13 (d,  $J = 1.6$  Hz, 1H, ArH), 7.05 (dd,  $J = 8.6, 1.8$  Hz, 1H, ArH), 6.62 (d,  $J = 8.6$  Hz, 1H, ArH);  **$^{13}\text{C NMR}$**  (151 MHz,  $\text{DMSO-}d_6$ )  $\delta$  165.54, 152.78, 138.28, 136.73, 135.78, 131.08, 130.33, 126.58, 125.45, 124.53, 124.47, 123.39, 122.27, 119.02, 117.42, 115.44, 115.38, 108.28, 73.28. **HRMS** (ESI-TOF)  $m/z$ :  $[\text{M} + \text{H}]^+$  calcd for  $\text{C}_{19}\text{H}_{12}\text{Br}_2\text{N}_7$  497.9495; Found 497.9488.

3'-Azido-6,6'-difluoro-2'-(1H-imidazol-1-yl)-1H,3'H-3,3'-biindole (**4d**)

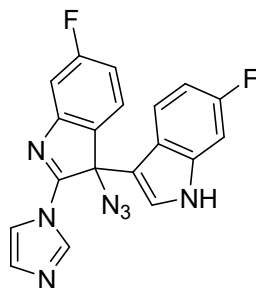

Reddish brown solid; Mp: 130.7 -131.4 °C; 228 mg, yield: 61%; **IR** (KBr): 3442, 2258, 2128, 1998, 1654, 1213, 1150, 821, 768, 632, 573, 513, 456, 424 cm<sup>-1</sup>; **<sup>1</sup>H NMR** (600 MHz, DMSO-*d*<sub>6</sub>) δ 11.64 (s, 1H, NH), 8.31 (s, 1H, ArH), 7.94 (d, *J* = 2.7 Hz, 1H, ArH), 7.77 (t, *J* = 1.5 Hz, 1H, ArH), 7.67 (dd, *J* = 8.9, 2.4 Hz, 1H, ArH), 7.41 (dd, *J* = 8.2, 5.2 Hz, 1H, ArH), 7.17 (dd, *J* = 9.9, 2.4 Hz, 1H, ArH), 7.15 – 7.12 (m, 1H, ArH), 7.09 (s, 1H, C= ArH), 6.73 (td, *J* = 9.3, 2.4 Hz, 1H, ArH), 6.55 (dd, *J* = 8.9, 5.2 Hz, 1H, ArH); **<sup>13</sup>C NMR** (151 MHz, DMSO-*d*<sub>6</sub>) δ 166.05, 164.37 (d, *J* = 244.5 Hz), 159.46 (d, *J* = 235.5 Hz), 153.14 (d, *J* = 12 Hz), 137.46 (d, *J* = 12 Hz), 136.73, 132.69, 131.04, 126.25, 125.26 (d, *J* = 9 Hz), 120.14, 118.44 (d, *J* = 10.5 Hz), 117.40, 113.98 (d, *J* = 24 Hz), 109.64 (d, *J* = 24 Hz), 109.04 (d, *J* = 25.5 Hz), 108.49, 98.84 (d, *J* = 25.5 Hz), 73.17; **<sup>19</sup>F NMR** (565 MHz, DMSO-*d*<sub>6</sub>) δ -109.13, -120.42. **HRMS** (ESI-TOF) *m/z*: [M + H]<sup>+</sup> calcd for C<sub>19</sub>H<sub>12</sub>F<sub>2</sub>N<sub>7</sub> 376.1117; Found 376.1112.

3'-Azido-2'-(1H-imidazol-1-yl)-5,5'-dimethyl-1H,3'H-3,3'-biindole (**4e**)

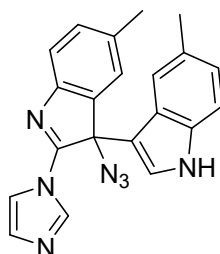

Reddish brown solid; Mp: 205.1 -205.8 °C; 231 mg, yield: 63%; **IR** (KBr): 3448, 2255, 2129, 1665, 1475, 1328, 835, 769, 694, 596, 573, 453 cm<sup>-1</sup>; **<sup>1</sup>H NMR** (600 MHz, DMSO-*d*<sub>6</sub>) δ 11.40 (s, 1H, NH), 8.25 (s, 1H, ArH), 7.83 (d, *J* = 2.7 Hz, 1H, ArH), 7.76 (s, 1H, ArH), 7.64 (d, *J* = 7.9 Hz, 1H, ArH), 7.35 (d, *J* = 7.9 Hz, 1H, ArH), 7.27 (d, *J* = 8.3 Hz, 1H, ArH), 7.15 (s, 1H, ArH), 7.05 (s, 1H, ArH), 6.87 (d, *J* = 8.3 Hz, 1H, ArH), 6.40 (s, 1H, ArH), 2.29 (s, 3H, CH<sub>3</sub>), 2.12 (s, 3H, CH<sub>3</sub>); **<sup>13</sup>C NMR** (151 MHz, DMSO-*d*<sub>6</sub>) δ 163.75, 148.95, 137.26, 137.04, 136.48, 135.80, 131.95, 130.66, 128.71, 125.02, 124.19, 124.11, 123.66, 120.98, 117.32, 116.97, 112.46, 108.04, 73.80, 21.70, 21.35. **HRMS** (ESI-TOF) *m/z*: [M + H]<sup>+</sup> calcd for C<sub>21</sub>H<sub>18</sub>N<sub>7</sub> 368.1618; Found 368.1615.

3'-Azido-2'-(1H-imidazol-1-yl)-6,6'-dimethyl-1H,3'H-3,3'-biindole (**4f**)



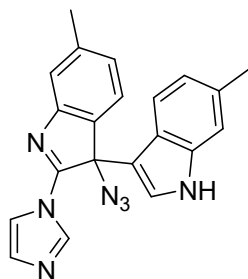

Reddish brown solid; Mp: 171.2 -172.5 °C; 220 mg, yield: 60%; **IR** (KBr): 3441, 2258, 2128, 1997, 1655, 1306, 834, 753, 621, 579, 524, 481, 414  $\text{cm}^{-1}$ ;  **$^1\text{H NMR}$**  (600 MHz,  $\text{DMSO-}d_6$ )  $\delta$  11.34 (s, 1H, NH), 8.25 (t,  $J = 1.0$  Hz, 1H, ArH), 7.79 (d,  $J = 2.7$  Hz, 1H, ArH), 7.75 (t,  $J = 1.5$  Hz, 1H, ArH), 7.59 – 7.52 (m, 1H, ArH), 7.20 (d,  $J = 7.5$  Hz, 1H, ArH), 7.15 (s, 1H, ArH), 7.11 (dt,  $J = 7.3, 1.2$  Hz, 1H, ArH), 7.05 (dd,  $J = 1.6, 0.8$  Hz, 1H, ArH), 6.62 (dd,  $J = 8.3, 1.5$  Hz, 1H, ArH), 6.46 (d,  $J = 8.3$  Hz, 1H, ArH), 2.42 (s, 3H,  $\text{CH}_3$ ), 2.27 (s, 3H,  $\text{CH}_3$ );  **$^{13}\text{C NMR}$**  (151 MHz,  $\text{DMSO-}d_6$ )  $\delta$  164.66, 151.51, 141.60, 137.85, 136.53, 133.96, 131.74, 130.69, 127.87, 124.36, 123.40, 122.04, 121.93, 121.35, 117.33, 117.17, 112.39, 108.60, 73.64, 21.70, 21.57. **HRMS** (ESI-TOF)  $m/z$ :  $[\text{M} + \text{H}]^+$  calcd for  $\text{C}_{21}\text{H}_{18}\text{N}_7$  368.1618; Found 368.1622.

3'-Azido-2'-(1H-imidazol-1-yl)-7,7'-dimethyl-1H,3'H-3,3'-biindole (**4g**)

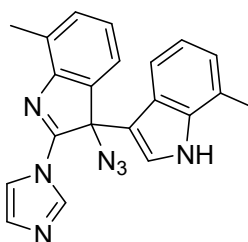

Reddish brown solid; Mp: 180.8 -181.8 °C; 158 mg, yield: 43%; **IR** (KBr): 3439, 2258, 2126, 1659, 1388, 828, 769, 625, 563, 536, 454  $\text{cm}^{-1}$ ;  **$^1\text{H NMR}$**  (600 MHz,  $\text{DMSO-}d_6$ )  $\delta$  11.55 (s, 1H, NH), 8.33 (s, 1H, ArH), 7.95 (d,  $J = 2.8$  Hz, 1H, ArH), 7.82 (t,  $J = 1.4$  Hz, 1H, ArH), 7.44 (d,  $J = 7.6$  Hz, 1H, ArH), 7.25 (t,  $J = 7.5$  Hz, 1H, ArH), 7.18 (d,  $J = 7.3$  Hz, 1H, ArH), 7.13 – 7.05 (m, 1H, ArH), 6.88 (d,  $J = 7.2$  Hz, 1H, ArH), 6.74 (t,  $J = 7.6$  Hz, 1H, ArH), 6.45 (d,  $J = 8.1$  Hz, 1H, ArH), 2.66 (s, 3H,  $\text{CH}_3$ ), 2.47 (s, 3H,  $\text{CH}_3$ );  **$^{13}\text{C NMR}$**  (151 MHz,  $\text{DMSO-}d_6$ )  $\delta$  163.47, 149.60, 136.93, 136.76, 136.53, 132.85, 130.93, 130.63, 127.32, 124.83, 123.19, 122.90, 122.04, 121.09, 120.40, 117.34, 115.12, 109.14, 74.07, 17.10, 16.69. **HRMS** (ESI-TOF)  $m/z$ :  $[\text{M} + \text{H}]^+$  calcd for  $\text{C}_{21}\text{H}_{18}\text{N}_7$  368.1618; Found 368.1613.

3'-Azido-2'-(1H-imidazol-1-yl)-5,5'-dimethoxy-1H,3'H-3,3'-biindole (**4h**)

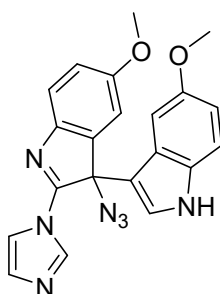

Reddish brown solid; Mp: 121.9 -122.6 °C; 263 mg, yield: 66%; **IR** (KBr): 3491, 2976, 2258, 2129, 1665, 1222, 826, 762, 691, 643, 590, 550, 493, 452 cm<sup>-1</sup>; **<sup>1</sup>H NMR** (600 MHz, DMSO-*d*<sub>6</sub>) δ 11.38 (d, *J* = 2.8 Hz, 1H, NH), 8.28 (s, 1H, ArH), 7.87 (d, *J* = 2.8 Hz, 1H, ArH), 7.76 (t, *J* = 1.4 Hz, 1H, ArH), 7.69 (d, *J* = 8.5 Hz, 1H, ArH), 7.28 (d, *J* = 8.8 Hz, 1H, ArH), 7.10 (dd, *J* = 8.5, 2.6 Hz, 1H, ArH), 7.05 (s, 1H, ArH), 6.92 (d, *J* = 2.6 Hz, 1H, ArH), 6.71 (dd, *J* = 8.8, 2.5 Hz, 1H, ArH), 6.00 (d, *J* = 2.4 Hz, 1H, ArH), 3.74 (s, 3H, CH<sub>3</sub>), 3.48 (s, 3H, CH<sub>3</sub>); **<sup>13</sup>C NMR** (151 MHz, DMSO-*d*<sub>6</sub>) δ 162.63, 159.16, 153.93, 144.36, 138.49, 136.37, 132.48, 130.57, 125.83, 123.83, 121.97, 117.25, 115.73, 113.44, 111.89, 110.61, 107.95, 99.80, 73.85, 56.24, 55.49. **HRMS** (ESI-TOF) *m/z*: [M + H]<sup>+</sup> calcd for C<sub>21</sub>H<sub>18</sub>N<sub>7</sub>O<sub>2</sub> 400.1516; Found 400.1512.

3'-Azido-2'-(2-methyl-1H-imidazol-1-yl)-1H,3'H-3,3'-biindole (**4i**)

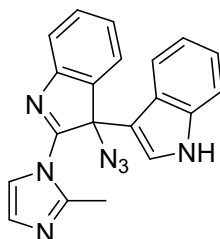

Reddish brown solid; Mp: 121.3 -122.2 °C; 144 mg, yield: 41%; **IR** (KBr): 3444, 2263, 2129, 1657, 1306, 824, 763, 626, 551, 518, 480, 454, 423 cm<sup>-1</sup>; **<sup>1</sup>H NMR** (600 MHz, DMSO-*d*<sub>6</sub>) δ 11.47 (d, *J* = 2.7 Hz, 1H, NH), 7.81 (d, *J* = 2.7 Hz, 1H, ArH), 7.75 (d, *J* = 7.8 Hz, 1H, ArH), 7.54 (td, *J* = 7.4, 1.8 Hz, 1H, ArH), 7.47 (d, *J* = 1.7 Hz, 1H, ArH), 7.37 (d, *J* = 8.2 Hz, 1H, ArH), 7.34 – 7.28 (m, 2H, ArH), 7.03 (ddd, *J* = 8.2, 6.9, 1.2 Hz, 1H, ArH), 6.81 (td, *J* = 7.5, 7.0, 1.1 Hz, 1H, ArH), 6.78 (d, *J* = 1.7 Hz, 1H, ArH), 6.64 (d, *J* = 8.1 Hz, 1H, ArH), 2.71 (s, 3H, CH<sub>3</sub>); **<sup>13</sup>C NMR** (151 MHz, DMSO-*d*<sub>6</sub>) δ 165.51, 151.43, 146.88, 137.35, 136.47, 131.57, 128.34, 127.55, 125.12, 123.67, 123.35, 122.40, 121.50, 120.17, 118.09, 117.38, 112.74, 108.39, 74.96, 17.74. **HRMS** (ESI-TOF) *m/z*: [M + H]<sup>+</sup> calcd for C<sub>20</sub>H<sub>16</sub>N<sub>7</sub> 354.1462; Found 354.1459.

3'-Azido-2'-(4-methyl-1H-imidazol-1-yl)-1H,3'H-3,3'-biindole (**4j**)

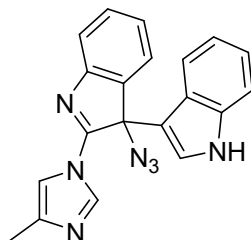

Reddish brown solid; Mp: 115.8 -117.3 °C; 208 mg, yield: 59%; **IR** (KBr): 3449, 2262, 2139, 1658, 1451, 821, 759, 629, 572, 455, 429 cm<sup>-1</sup>; **<sup>1</sup>H NMR** (600 MHz, DMSO-*d*<sub>6</sub>) δ 11.56 (d, *J* = 2.8 Hz, 1H, NH), 8.20 (d, *J* = 1.3 Hz, 1H, ArH), 7.94 (d, *J* = 2.7 Hz, 1H, ArH), 7.75 (d, *J* = 7.7 Hz, 1H, ArH), 7.57 (td, *J* = 7.7, 1.4 Hz, 1H, ArH), 7.55 – 7.52 (m, 1H, ArH), 7.42 (d, *J* = 7.9 Hz, 1H, ArH), 7.36 (dd, *J* = 7.5, 1.4 Hz, 1H, ArH), 7.32 (td, *J* = 7.5, 1.1 Hz, 1H, ArH), 7.07 (ddd, *J* = 8.2, 7.1, 1.1 Hz, 1H, ArH), 6.82 (ddd, *J* = 8.2, 7.0, 1.1 Hz, 1H, ArH), 6.63 (d, *J* = 8.1 Hz, 1H, ArH), 2.10 (s, 3H, CH<sub>3</sub>); **<sup>13</sup>C NMR** (151 MHz, DMSO-*d*<sub>6</sub>) δ 164.23, 151.47, 139.64, 137.42, 136.81,

136.12, 131.63, 127.29, 125.12, 123.72, 123.41, 122.43, 121.20, 120.17, 117.46, 113.23, 112.75, 108.70, 73.68, 13.70. **HRMS** (ESI-TOF)  $m/z$ :  $[M + H]^+$  calcd for  $C_{20}H_{16}N_7$  354.1462; Found 354.1464.

3'-Azido-6,6'-dichloro-2'-(4-methyl-1H-imidazol-1-yl)-1H,3'H-3,3'-biindole (**4k**)

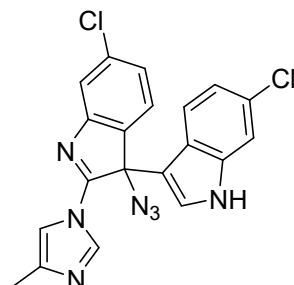

Reddish brown solid; Mp: 123.6 -124.8 °C; 240 mg, yield: 57%; **IR** (KBr): 3448, 2259, 2121, 1655, 834, 773, 631, 572, 517, 483, 452, 424  $cm^{-1}$ ;  **$^1H$  NMR** (600 MHz,  $DMSO-d_6$ )  $\delta$  11.70 (d,  $J = 2.8$  Hz, 1H, NH), 8.16 (s, 1H, ArH), 7.95 (d,  $J = 2.7$  Hz, 1H, ArH), 7.82 (d,  $J = 1.7$  Hz, 1H, ArH), 7.51 – 7.42 (m, 2H, ArH), 7.39 – 7.33 (m, 2H, ArH), 6.89 (dd,  $J = 8.6, 1.9$  Hz, 1H, ArH), 6.64 (d,  $J = 8.6$  Hz, 1H, ArH), 2.08 (s, 3H,  $CH_3$ );  **$^{13}C$  NMR** (151 MHz,  $DMSO-d_6$ )  $\delta$  165.46, 152.90, 140.01, 137.85, 136.26, 136.04, 135.33, 127.41, 127.13, 126.54, 125.04, 122.08, 121.53, 120.80, 118.70, 113.22, 112.47, 108.55, 73.16, 13.70. **HRMS** (ESI-TOF)  $m/z$ :  $[M + H]^+$  calcd for  $C_{20}H_{14}Cl_2N_7$  422.0682; Found 422.0680.

3'-Azido-6,6'-dibromo-2'-(4-methyl-1H-imidazol-1-yl)-1H,3'H-3,3'-biindole (**4l**)

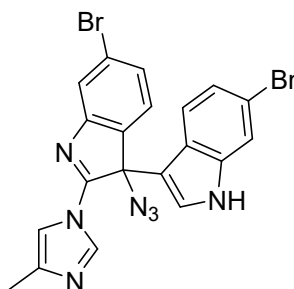

Reddish brown solid; Mp: 154.1 -154.7 °C; 275 mg, yield: 54%; **IR** (KBr): 3447, 2256, 2137, 1996, 1653, 1306, 821, 773, 674, 624, 542, 514, 456, 413  $cm^{-1}$ ;  **$^1H$  NMR** (600 MHz,  $DMSO-d_6$ )  $\delta$  11.70 (d,  $J = 2.7$  Hz, 1H, NH), 8.15 (d,  $J = 1.3$  Hz, 1H, ArH), 7.95 (d,  $J = 1.8$  Hz, 1H, ArH), 7.93 (d,  $J = 2.7$  Hz, 1H, ArH), 7.59 (d,  $J = 1.8$  Hz, 1H, ArH), 7.49 (dd,  $J = 7.9, 1.8$  Hz, 1H, ArH), 7.48 – 7.45 (m, 1H, ArH), 7.30 (d,  $J = 7.9$  Hz, 1H, ArH), 7.00 (dd,  $J = 8.6, 1.8$  Hz, 1H, ArH), 6.58 (d,  $J = 8.6$  Hz, 1H, ArH), 2.07 (s, 3H,  $CH_3$ );  **$^{13}C$  NMR** (151 MHz,  $DMSO-d_6$ )  $\delta$  165.29, 152.97, 140.02, 138.28, 136.25, 135.73, 130.07, 126.42, 125.38, 124.42, 124.31, 123.36, 122.30, 119.05, 115.43, 115.36, 113.22, 108.51, 73.20, 13.69. **HRMS** (ESI-TOF)  $m/z$ :  $[M + H]^+$  calcd for  $C_{20}H_{14}Br_2N_7$  511.9651; Found 511.9652.

3'-Azido-6,6'-difluoro-2'-(4-methyl-1H-imidazol-1-yl)-1H,3'H-3,3'-biindole (**4m**)

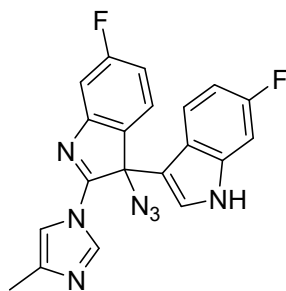

Reddish brown solid; Mp: 162.2 -163.3 °C; 210 mg, yield: 54%; **IR** (KBr): 3462, 3078, 2342, 2256, 2124, 1665, 825, 761, 694, 622, 595, 532, 498, 441 cm<sup>-1</sup>; **<sup>1</sup>H NMR** (600 MHz, DMSO-*d*<sub>6</sub>) δ 11.61 (d, *J* = 2.7 Hz, 1H, NH), 8.17 (d, *J* = 1.4 Hz, 1H, ArH), 7.92 (d, *J* = 2.7 Hz, 1H, ArH), 7.63 (dd, *J* = 8.9, 2.4 Hz, 1H, ArH), 7.52 – 7.44 (m, 1H, ArH), 7.38 (dd, *J* = 8.2, 5.2 Hz, 1H, ArH), 7.17 (dd, *J* = 9.8, 2.4 Hz, 1H, ArH), 7.12 (ddd, *J* = 9.4, 8.2, 2.4 Hz, 1H, ArH), 6.73 (td, *J* = 9.3, 2.4 Hz, 1H, ArH), 6.57 (dd, *J* = 8.9, 5.2 Hz, 1H, ArH), 2.08 (s, 3H, CH<sub>3</sub>); **<sup>13</sup>C NMR** (151 MHz, DMSO-*d*<sub>6</sub>) δ 165.80, 164.36 (d, *J* = 244.5 Hz), 159.45 (d, *J* = 235.5 Hz), 153.32 (d, *J* = 12 Hz), 139.95, 137.44 (d, *J* = 12 Hz), 136.26, 132.61, 126.10, 125.19 (d, *J* = 10.5 Hz), 120.15, 118.45 (d, *J* = 9 Hz), 113.72 (d, *J* = 24 Hz), 113.21, 109.42 (d, *J* = 24 Hz), 109.01 (d, *J* = 24 Hz), 108.72, 98.83 (d, *J* = 27 Hz), 73.06, 13.72; **<sup>19</sup>F NMR** (565 MHz, DMSO-*d*<sub>6</sub>) δ -109.23, -120.44. **HRMS** (ESI-TOF) *m/z*: [M + H]<sup>+</sup> calcd for C<sub>20</sub>H<sub>14</sub>F<sub>2</sub>N<sub>7</sub> 390.1273; Found 390.1267.

3'-Azido-5,5'-dimethyl-2'-(4-methyl-1H-imidazol-1-yl)-1H,3'H-3,3'-biindole (**4n**)

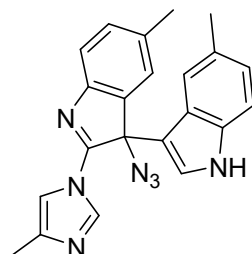

Reddish brown solid; Mp: 107.3 -108.4 °C; 221 mg, yield: 58%; **IR** (KBr): 3444, 2258, 2126, 1655, 814, 762, 621, 574, 530, 454, 418 cm<sup>-1</sup>; **<sup>1</sup>H NMR** (600 MHz, DMSO-*d*<sub>6</sub>) δ 11.39 (s, 1H, NH), 8.12 (t, *J* = 1.3 Hz, 1H, ArH), 7.81 (d, *J* = 2.5 Hz, 1H, ArH), 7.60 (d, *J* = 7.9 Hz, 1H, ArH), 7.48 (q, *J* = 1.3 Hz, 1H, ArH), 7.38 – 7.29 (m, 1H, ArH), 7.27 (d, *J* = 8.3 Hz, 1H, ArH), 7.12 (s, 1H, ArH), 6.87 (d, *J* = 8.3 Hz, 1H, ArH), 6.42 (s, 1H, ArH), 2.28 (s, 3H, CH<sub>3</sub>), 2.12 (s, 3H, CH<sub>3</sub>), 2.07 (s, 3H, CH<sub>3</sub>); **<sup>13</sup>C NMR** (151 MHz, DMSO-*d*<sub>6</sub>) δ 163.54, 149.13, 139.50, 136.99, 136.95, 135.98, 135.80, 131.88, 128.65, 124.86, 124.12, 124.07, 123.69, 120.78, 117.03, 113.18, 112.44, 108.27, 73.74, 21.72, 21.33, 13.72. **HRMS** (ESI-TOF) *m/z*: [M + H]<sup>+</sup> calcd for C<sub>22</sub>H<sub>20</sub>N<sub>7</sub> 382.1775; Found 382.1772.

3'-Azido-6,6'-dimethyl-2'-(4-methyl-1H-imidazol-1-yl)-1H,3'H-3,3'-biindole (**4o**)

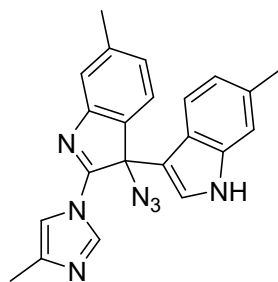

Reddish brown solid; Mp: 128.8 -129.7 °C; 213 mg, yield: 56%; **IR** (KBr): 3445, 2242, 2129, 1660, 1457, 819, 758, 621, 526, 455, 422  $\text{cm}^{-1}$ ;  **$^1\text{H NMR}$**  (600 MHz,  $\text{DMSO-}d_6$ )  $\delta$  11.32 (d,  $J = 2.7$  Hz, 1H, NH), 8.11 (s, 1H, ArH), 7.77 (d,  $J = 2.7$  Hz, 1H, ArH), 7.53 (s, 1H, ArH), 7.47 (s, 1H, ArH), 7.17 (d,  $J = 7.5$  Hz, 1H, ArH), 7.15 (s, 1H, ArH), 7.08 (d,  $J = 7.6$  Hz, 1H, ArH), 6.62 (d,  $J = 8.3$  Hz, 1H, ArH), 6.47 (d,  $J = 8.2$  Hz, 1H, ArH), 2.40 (s, 3H,  $\text{CH}_3$ ), 2.27 (s, 3H,  $\text{CH}_3$ ), 2.06 (s, 3H,  $\text{CH}_3$ );  **$^{13}\text{C NMR}$**  (151 MHz,  $\text{DMSO-}d_6$ )  $\delta$  164.44, 151.65, 141.53, 139.54, 137.84, 136.04, 133.88, 131.74, 127.64, 124.17, 123.33, 121.90, 121.84, 121.35, 117.19, 113.18, 112.37, 108.85, 73.56, 21.69, 21.57, 13.68. **HRMS** (ESI-TOF)  $m/z$ :  $[\text{M} + \text{H}]^+$  calcd for  $\text{C}_{22}\text{H}_{20}\text{N}_7$  382.1775; Found 382.1771.

3'-Azido-7,7'-dimethyl-2'-(4-methyl-1H-imidazol-1-yl)-1H,3'H-3,3'-biindole (**4p**)

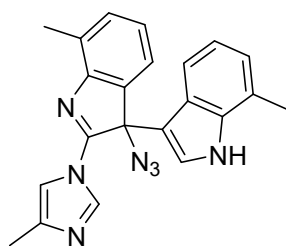

Reddish brown solid; Mp: 144.1 -144.9 °C; 160 mg, yield: 42%; **IR** (KBr): 3444, 2243, 2119, 2009, 1667, 821, 758, 625, 572, 495, 450, 418  $\text{cm}^{-1}$ ;  **$^1\text{H NMR}$**  (600 MHz,  $\text{DMSO-}d_6$ )  $\delta$  11.49 (d,  $J = 2.8$  Hz, 1H, NH), 8.14 (s, 1H, ArH), 7.88 (d,  $J = 2.8$  Hz, 1H, ArH), 7.51 (t,  $J = 1.4$  Hz, 1H, ArH), 7.36 (d,  $J = 7.7$  Hz, 1H, ArH), 7.17 (t,  $J = 7.5$  Hz, 1H, ArH), 7.11 (d,  $J = 7.3$  Hz, 1H, ArH), 6.83 (d,  $J = 7.1$  Hz, 1H, ArH), 6.70 (t,  $J = 7.6$  Hz, 1H, ArH), 6.43 (d,  $J = 8.1$  Hz, 1H, ArH), 2.60 (s, 3H,  $\text{CH}_3$ ), 2.42 (s, 3H,  $\text{CH}_3$ ), 2.08 (s, 3H,  $\text{CH}_3$ );  **$^{13}\text{C NMR}$**  (151 MHz,  $\text{DMSO-}d_6$ )  $\delta$  163.26, 149.76, 139.49, 136.91, 136.69, 136.03, 132.78, 130.67, 127.07, 124.69, 123.20, 122.86, 122.01, 121.03, 120.36, 115.15, 113.23, 109.35, 73.96, 17.11, 16.69, 13.70. **HRMS** (ESI-TOF)  $m/z$ :  $[\text{M} + \text{H}]^+$  calcd for  $\text{C}_{22}\text{H}_{20}\text{N}_7$  382.1775; Found 382.1776.

3'-Azido-5,5'-dimethoxy-2'-(4-methyl-1H-imidazol-1-yl)-1H,3'H-3,3'-biindole (**4q**)

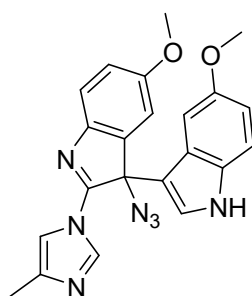

Reddish brown solid; Mp: 123.6 -124.5 °C; 231 mg, yield: 56%; **IR** (KBr): 3446, 2252, 2129, 2001, 1656, 1489, 821, 763, 620, 559, 537, 482, 456, 425 cm<sup>-1</sup>; **<sup>1</sup>H NMR** (600 MHz, DMSO-*d*<sub>6</sub>) δ 11.36 (d, *J* = 2.8 Hz, 1H, NH), 8.14 (s, 1H, ArH), 7.84 (d, *J* = 2.8 Hz, 1H, ArH), 7.65 (d, *J* = 8.5 Hz, 1H, ArH), 7.52 – 7.43 (m, 1H, ArH), 7.28 (d, *J* = 8.8 Hz, 1H, ArH), 7.08 (dd, *J* = 8.5, 2.6 Hz, 1H, ArH), 6.90 (d, *J* = 2.6 Hz, 1H, ArH), 6.72 (dd, *J* = 8.8, 2.5 Hz, 1H, ArH), 6.03 (d, *J* = 2.5 Hz, 1H, ArH), 3.73 (s, 3H, CH<sub>3</sub>), 3.48 (s, 3H, CH<sub>3</sub>), 2.07 (s, 3H, CH<sub>3</sub>); **<sup>13</sup>C NMR** (151 MHz, DMSO-*d*<sub>6</sub>) δ 162.46, 158.99, 153.92, 144.55, 139.39, 138.42, 135.86, 132.49, 125.68, 123.86, 121.74, 115.68, 113.41, 113.12, 111.86, 110.54, 108.20, 99.89, 73.81, 56.21, 55.51, 13.73. **HRMS** (ESI-TOF) *m/z*: [M + H]<sup>+</sup> calcd for C<sub>22</sub>H<sub>20</sub>N<sub>7</sub>O<sub>2</sub> 414.1673; Found 414.1667.

4-((1H-benzo[d]imidazol-1-yl)methyl)-2,6-di-tert-butylphenol (**5**)

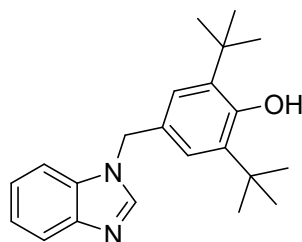

White solid; Mp: 151.4 -152.6 °C; 141 mg, yield: 42%; **IR** (KBr): 3624, 2910, 2746, 2577, 1703, 1628, 1481, 1365, 1197, 964, 847, 732 cm<sup>-1</sup>; **<sup>1</sup>H NMR** (600 MHz, DMSO-*d*<sub>6</sub>) δ 8.40 (s, 1H, ArH), 7.67 (d, *J* = 8.1 Hz, 1H, ArH), 7.63 (d, *J* = 8.0 Hz, 1H, ArH), 7.24 (t, *J* = 7.6 Hz, 1H, ArH), 7.19 (t, *J* = 7.5 Hz, 1H, ArH), 7.15 (s, 2H, ArH), 7.06 (s, 1H, OH), 5.38 (s, 2H, CH<sub>2</sub>), 1.35 (s, 18H, CH<sub>3</sub>); **<sup>13</sup>C NMR** (151 MHz, DMSO-*d*<sub>6</sub>) δ 153.92, 144.46, 143.95, 139.95, 134.25, 128.32, 124.53, 122.76, 121.96, 119.90, 111.20, 48.47, 34.94, 30.75. **HRMS** (ESI-TOF) *m/z*: [M + H]<sup>+</sup> calcd for C<sub>22</sub>H<sub>29</sub>N<sub>2</sub>O 337.2274; Found 337.2269.

2-(1H-benzo[d]imidazol-1-yl)-1H,1'H-3,3'-biindole (**6**)

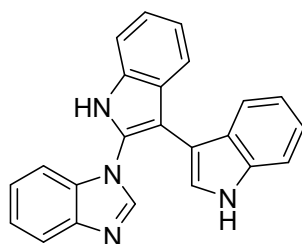

Reddish brown solid; Mp: 282.4 -283.8 °C; 309 mg, yield: 89%; **IR** (KBr): 3767, 3426, 3060, 2355, 1655, 824, 766, 611, 503, 450 cm<sup>-1</sup>; **<sup>1</sup>H NMR** (600 MHz, DMSO-*d*<sub>6</sub>) δ 12.08 (s, 1H, NH), 11.20 (d, *J* = 2.6 Hz, 1H, NH), 8.45 (s, 1H, ArH), 7.71 (d, *J* = 7.9 Hz, 1H, ArH), 7.60 (d, *J* = 8.0 Hz, 1H, ArH), 7.51 (d, *J* = 8.1 Hz, 1H, ArH), 7.38 – 7.33 (m, 2H, ArH), 7.29 (td, *J* = 8.0, 2.9 Hz, 2H, ArH), 7.26 – 7.19 (m, 2H, ArH), 7.16 (t, *J* = 7.5 Hz, 1H, ArH), 7.05 – 7.00 (m, 2H, ArH), 6.77 (t, *J* = 7.5 Hz, 1H, ArH); **<sup>13</sup>C NMR** (151 MHz, DMSO-*d*<sub>6</sub>) δ 144.90, 143.14, 136.57, 134.94, 134.49, 127.43, 126.92, 126.38, 124.46, 123.97, 123.12, 122.97, 121.64, 120.45, 120.29, 120.12, 119.29, 119.15, 112.19, 112.12, 111.36, 106.50, 104.74. **HRMS** (ESI-TOF) *m/z*: [M + H]<sup>+</sup> calcd for C<sub>23</sub>H<sub>17</sub>N<sub>4</sub> 349.1448; Found 349.1440.

4-((2-(1H-benzo[d]imidazol-1-yl)-1H-indol-3-yl)methyl)-2,6-di-tert-butylphenol (**7**)

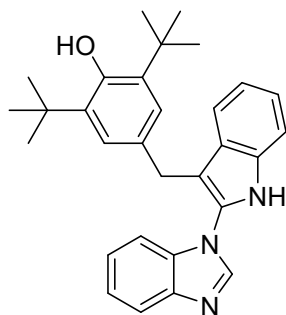

**HRMS** (ESI-TOF)  $m/z$ :  $[M + H]^+$  calcd for  $C_{30}H_{34}N_3O$  452.2696; Found 452.2690.

methyl 2-(1-(2'-(1H-benzo[d]imidazol-1-yl)-1H,3'H-[3,3'-biindol]-3'-yl)-1H-1,2,3-triazol-4-yl)acetate (**8**)

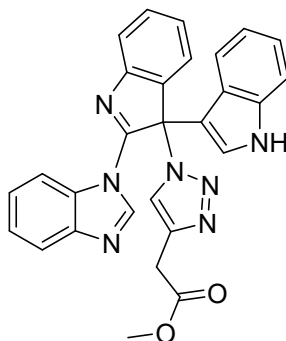

Reddish brown solid; Mp: 267.2 -268.5 °C; 3.17 g, yield: 92%; **IR** (KBr): 3760, 3414, 3018, 2127, 1788, 1651, 826, 760, 613, 504, 453  $cm^{-1}$ ;  **$^1H$  NMR** (600 MHz,  $DMSO-d_6$ )  $\delta$  9.11 (s, 1H, NH), 8.19 (s, 1H, ArH), 7.94 (dd,  $J = 7.9, 1.5$  Hz, 1H, ArH), 7.85 (t,  $J = 1.2$  Hz, 1H, ArH), 7.76 (s, 1H, ArH), 7.69 – 7.61 (m, 2H, ArH), 7.54 – 7.47 (m, 3H, ArH), 7.40 (td,  $J = 7.5, 1.3$  Hz, 1H, ArH), 7.32 (ddd,  $J = 8.3, 7.1, 1.4$  Hz, 1H, ArH), 7.22 (tdd,  $J = 7.6, 4.8, 1.4$  Hz, 2H, ArH), 7.11 (dtd,  $J = 11.5, 7.6, 1.5$  Hz, 2H, ArH), 3.85 (d,  $J = 1.2$  Hz, 2H,  $CH_2$ ), 3.75 (s, 3H,  $CH_3$ );  **$^{13}C$  NMR** (151 MHz,  $DMSO-d_6$ )  $\delta$  169.72, 155.73, 145.68, 142.87, 140.48, 140.02, 138.47, 138.19, 132.53, 130.56, 130.26, 128.72, 127.26, 124.93, 124.65, 122.19, 122.04, 121.58, 120.88, 120.49, 120.35, 118.68, 116.90, 111.44, 108.98, 61.08, 52.08, 33.28. **HRMS** (ESI-TOF)  $m/z$ :  $[M + H]^+$  calcd for  $C_{28}H_{22}N_7O_2$  488.1829; Found 488.1826.

#### 4. Reaction Condition Optimizations

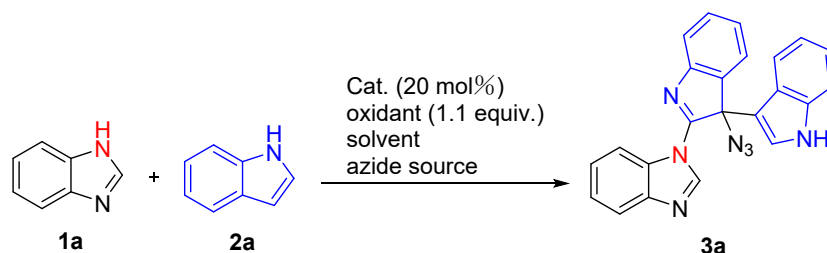

| Entry           | Catalyst                           | Oxidant | Azide source      | Solvent                         | <i>t</i> [°C] <sup>b</sup> | Yield (%) |
|-----------------|------------------------------------|---------|-------------------|---------------------------------|----------------------------|-----------|
| 1               | CuI <sub>2</sub>                   | PIFA    | NaN <sub>3</sub>  | CH <sub>2</sub> Cl <sub>2</sub> | rt                         | 11        |
| 2               | CuI                                | PIFA    | NaN <sub>3</sub>  | CH <sub>2</sub> Cl <sub>2</sub> | rt                         | 9         |
| 3               | CuCl <sub>2</sub>                  | PIFA    | NaN <sub>3</sub>  | CH <sub>2</sub> Cl <sub>2</sub> | rt                         | 17        |
| 4               | CuBr <sub>2</sub>                  | PIFA    | NaN <sub>3</sub>  | CH <sub>2</sub> Cl <sub>2</sub> | rt                         | 14        |
| 5               | CuBr                               | PIFA    | NaN <sub>3</sub>  | CH <sub>2</sub> Cl <sub>2</sub> | rt                         | 8         |
| 6               | Cu(OAc) <sub>2</sub>               | PIFA    | NaN <sub>3</sub>  | CH <sub>2</sub> Cl <sub>2</sub> | rt                         | 32        |
| 7               | Cu(acac) <sub>2</sub> <sup>d</sup> | PIFA    | NaN <sub>3</sub>  | CH <sub>2</sub> Cl <sub>2</sub> | rt                         | 17        |
| 8               | FeCl <sub>3</sub>                  | PIFA    | NaN <sub>3</sub>  | CH <sub>2</sub> Cl <sub>2</sub> | rt                         | nr        |
| 9               | Cu(OAc) <sub>2</sub>               | PIFA    | NaN <sub>3</sub>  | MeCN                            | rt                         | 21        |
| 10              | Cu(OAc) <sub>2</sub>               | PIFA    | NaN <sub>3</sub>  | CHCl <sub>3</sub>               | rt                         | 15        |
| 11              | Cu(OAc) <sub>2</sub>               | PIFA    | NaN <sub>3</sub>  | 1,4-dioxane                     | rt                         | 30        |
| 12              | Cu(OAc) <sub>2</sub>               | PIFA    | NaN <sub>3</sub>  | THF                             | rt                         | 34        |
| 13              | Cu(OAc) <sub>2</sub>               | PIFA    | NaN <sub>3</sub>  | Ethyl Acetate                   | rt                         | 56        |
| 14              | Cu(OAc) <sub>2</sub>               | PIDA    | NaN <sub>3</sub>  | Ethyl Acetate                   | rt                         | 25        |
| 15              | Cu(OAc) <sub>2</sub>               | IBX     | NaN <sub>3</sub>  | Ethyl Acetate                   | rt                         | 23        |
| 16              | Cu(OAc) <sub>2</sub>               | DTBP    | NaN <sub>3</sub>  | Ethyl Acetate                   | rt                         | 19        |
| 17              | Cu(OAc) <sub>2</sub>               | TBHP    | NaN <sub>3</sub>  | Ethyl Acetate                   | rt                         | 16        |
| 18              | Cu(OAc) <sub>2</sub>               | PIFA    | TMSN <sub>3</sub> | Ethyl Acetate                   | rt                         | 27        |
| 19              | Cu(OAc) <sub>2</sub>               | PIFA    | DPPA              | Ethyl Acetate                   | rt                         | 15        |
| 20              | Cu(OAc) <sub>2</sub>               | PIFA    | NaN <sub>3</sub>  | Ethyl Acetate                   | 40                         | 59        |
| 21              | Cu(OAc) <sub>2</sub>               | PIFA    | NaN <sub>3</sub>  | Ethyl Acetate                   | 50                         | 64        |
| 22              | Cu(OAc) <sub>2</sub>               | PIFA    | NaN <sub>3</sub>  | Ethyl Acetate                   | reflux                     | 76        |
| 23              | Cu(OAc) <sub>2</sub> <sup>e</sup>  | PIFA    | NaN <sub>3</sub>  | Ethyl Acetate                   | reflux                     | 58        |
| 24              | Cu(OAc) <sub>2</sub> <sup>f</sup>  | PIFA    | NaN <sub>3</sub>  | Ethyl Acetate                   | reflux                     | 41        |
| 25 <sup>g</sup> | Cu(OAc) <sub>2</sub>               | PIFA    | NaN <sub>3</sub>  | Ethyl Acetate                   | reflux                     | 73        |

<sup>a</sup> Reagents and conditions: In a 25 mL reaction tube, benzimidazole **1a** (0.5 mmol), indole **2a** (1.1 mmol), oxidant (0.55 mmol), catalyst (20 mol%), azide source (0.75 mmol), solvent 10 mL, under aerobic atmosphere (1 atm), stirred for 5 h. <sup>b</sup> rt = room temperature. <sup>c</sup> Isolated yield based on **1a**. <sup>d</sup> acac = acetylacetonate. <sup>e</sup> Catalyst (10 mol%). <sup>f</sup> Catalyst (5 mol%). <sup>g</sup> under argon (1 atm) atmosphere.

**Table S1.** Reaction Condition Optimizations<sup>a,c</sup>

Our initial attempt involved the cascade reaction of benzimidazole (**1a**) and indole (**2a**) was studied in the presence of a series of catalysts by using PIFA as an oxidant in



dichloromethane. Different catalysts were screened for their ability to catalyze the cascade reaction at room temperature (Table S1, entries 1–8). The results indicated that the use of  $\text{Cu}(\text{OAc})_2$  led to the highest yield (32%) of the model azide-biindole product **3a** (Table S1, entry 6). Encouraged by this result, we sought to enhance the yield of this cascade reaction by screening a variety of different solvents (Table S1, entries 9–13). Using  $\text{Cu}(\text{OAc})_2$  as the catalyst in the presence of PIFA and sodium azide, the highest yield of **3a** was obtained when using ethyl acetate as the solvent (56% yield, Table S1, entry 13). Subsequent screening of other oxidants indicated that PIFA remained the best oxidant for furnishing **3a** in the highest yield (Table S1, entries 14–17). In addition to  $\text{NaN}_3$ , azidotrimethylsilane ( $\text{TMSN}_3$ ) and diphenyl phosphoryl azide (DPPA) were screened as the azide source (Table S1, entries 18–19). The results showed that  $\text{NaN}_3$  was more reactive than the other organic azides (Table S1, entry 13). Then, increasing the reaction temperature from 40°C to reflux afforded increasingly higher yields compared to at r.t., with the highest yield being obtained under refluxing conditions (76% yield, Table S1, entry 22). In addition, the amount of the catalyst was screened, showing that a decrease in the amount of the catalyst decreased the yield of the reaction; approximately 20 mol% was identified as the optimal amount (Table S1, entry 23, 24 vs entry 22). Finally, the reaction proceeded under argon atmosphere to test whether the inert gas (argon) environment affected the yield of this cascade reaction, we found that under inert atmosphere, the reaction yield did not change significantly (Table S1, entry 25). Therefore, the results of the reaction optimization indicated that ethyl acetate as the solvent, 1.1 equiv. of PIFA as the oxidant, 20 mol%  $\text{Cu}(\text{OAc})_2$  as the catalyst, 1.5 equiv. of  $\text{NaN}_3$  as the azide source, a temperature of reflux temperature was best-suited for the synthesis of compound **3a** (Table S1, entry 22).

## 5. X-ray Structure and Data of **3a**

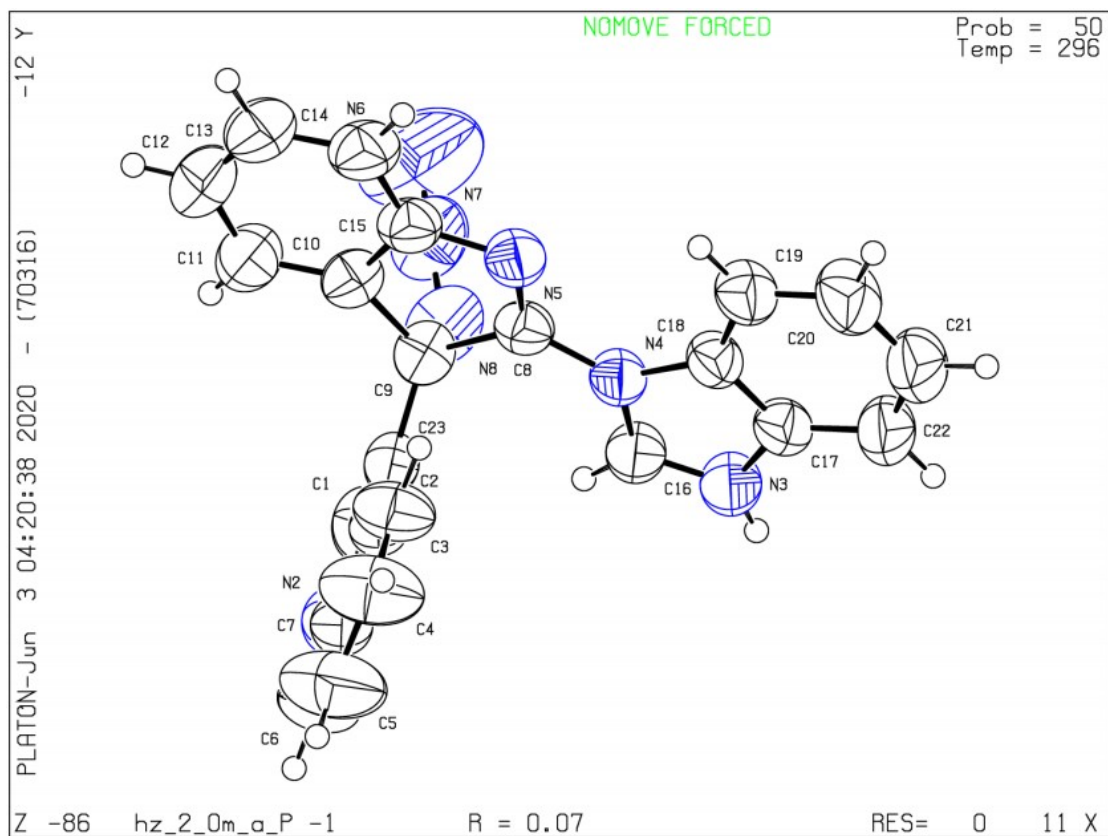

**Figure S1.** X-Ray crystal structure of **3a**

**Table S2.** Crystal data and structure refinement for **3a****Datablock: hz\_2\_0m\_a\_sq**

---

|                        |                        |                         |                   |
|------------------------|------------------------|-------------------------|-------------------|
| Bond precision:        | C-C = 0.0039 Å         | Wavelength=0.71073      |                   |
| Cell:                  | a=10.6842 (17)         | b=10.8749 (17)          | c=12.429 (2)      |
|                        | alpha=91.808 (2)       | beta=111.391 (2)        | gamma=101.478 (2) |
| Temperature:           | 296 K                  |                         |                   |
|                        | Calculated             | Reported                |                   |
| Volume                 | 1309.1 (4)             | 1309.1 (4)              |                   |
| Space group            | P -1                   | P -1                    |                   |
| Hall group             | -P 1                   | -P 1                    |                   |
| Moiety formula         | C23 H15 N7 [+ solvent] | ?                       |                   |
| Sum formula            | C23 H15 N7 [+ solvent] | C19.50 H19.50 N19.50 O0 |                   |
| Mr                     | 389.42                 | 527.04                  |                   |
| Dx, g cm <sup>-3</sup> | 0.988                  | 1.337                   |                   |
| Z                      | 2                      | 2                       |                   |
| Mu (mm <sup>-1</sup> ) | 0.063                  | 0.095                   |                   |
| F000                   | 404.0                  | 546.0                   |                   |
| F000'                  | 404.12                 |                         |                   |
| h, k, lmax             | 13, 14, 16             | 13, 14, 16              |                   |
| Nref                   | 5996                   | 5904                    |                   |
| Tmin, Tmax             | 0.986, 0.989           |                         |                   |
| Tmin'                  | 0.986                  |                         |                   |
| Correction method=     | Not given              |                         |                   |
| Data completeness=     | 0.985                  | Theta(max)=             | 27.491            |
| R(reflections)=        | 0.0669 ( 3171)         | wR2(reflections)=       | 0.2246 ( 5904)    |
| S =                    | 1.186                  | Npar=                   | 271               |

---

Compound **3a** (50 mg) was added to a 10 mL sample bottle, followed by the addition of DCM (2 mL), n-hexane (2.5 mL) and toluene (0.1 mL), then seal the bottle with a parafilm, and poke 15 small holes on the parafilm, place the sample bottle in a safe place to allow it to volatilize and separate out the single crystal. Take out the single crystal and send it for single crystal diffraction test to obtain relevant data. Instrument model: Intensity data for single crystals of each complex were collected on a BRUKER SMART APEX II CCD detector with graphite-monochromatized Mo K $\alpha$  radiation ( $k = 0.071073$  nm). The structures were solved by direct method using the program SHELXS-97 and subsequent Fourier difference techniques, and refined anisotropically by full matrix least-squares on F2 using SHELXL-97.

## 6. X-ray Structure and Data of **4p**

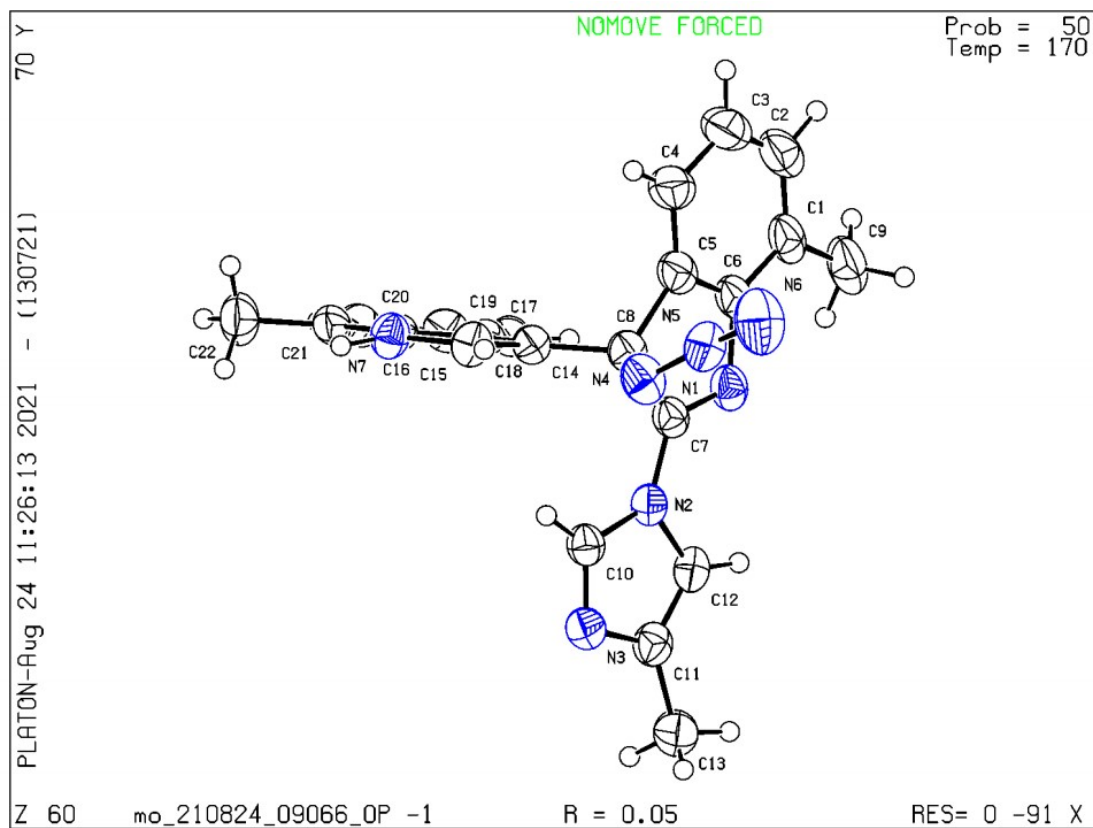

**Figure S2.** X-Ray crystal structure of **4p**

**Table S3.** Crystal data and structure refinement for **4p****Datablock: mo\_210824\_09066\_0m**


---

|                                                               |                 |                    |                 |
|---------------------------------------------------------------|-----------------|--------------------|-----------------|
| Bond precision:                                               | C-C = 0.0031 Å  | Wavelength=0.71073 |                 |
| Cell:                                                         | a=8.0191(10)    | b=10.4708(13)      | c=13.0070(16)   |
|                                                               | alpha=68.608(5) | beta=84.564(5)     | gamma=75.181(4) |
| Temperature:                                                  | 170 K           |                    |                 |
|                                                               | Calculated      | Reported           |                 |
| Volume                                                        | 983.1(2)        | 983.1(2)           |                 |
| Space group                                                   | P -1            | P -1               |                 |
| Hall group                                                    | -P 1            | -P 1               |                 |
| Moiety formula                                                | C22 H19 N7      | C22 H19 N7         |                 |
| Sum formula                                                   | C22 H19 N7      | C22 H19 N7         |                 |
| Mr                                                            | 381.44          | 381.44             |                 |
| Dx, g cm <sup>-3</sup>                                        | 1.289           | 1.289              |                 |
| Z                                                             | 2               | 2                  |                 |
| Mu (mm <sup>-1</sup> )                                        | 0.082           | 0.082              |                 |
| F000                                                          | 400.0           | 400.0              |                 |
| F000'                                                         | 400.12          |                    |                 |
| h, k, lmax                                                    | 10, 13, 16      | 10, 13, 16         |                 |
| Nref                                                          | 4363            | 4139               |                 |
| Tmin, Tmax                                                    | 0.996, 0.998    | 0.673, 0.746       |                 |
| Tmin'                                                         | 0.994           |                    |                 |
| Correction method= # Reported T Limits: Tmin=0.673 Tmax=0.746 |                 |                    |                 |
| AbsCorr = MULTI-SCAN                                          |                 |                    |                 |
| Data completeness=                                            | 0.949           | Theta(max)= 27.147 |                 |
| R(reflections)=                                               | 0.0514( 2681)   | wR2(reflections)=  |                 |
| S =                                                           | 1.040           | 0.1445( 4139)      |                 |
|                                                               | Npar= 268       |                    |                 |

Compound **4p** (50 mg) was added to a 10 mL sample bottle, followed by adding DCM (2 mL), n-hexane (2.5 mL) and toluene (0.1 mL), then seal the bottle with a parafilm, and poke 15 small holes on the parafilm, place the sample bottle in a safe place to allow it to volatilize and separate out the single crystal. Take out the single crystal and send it for single crystal diffraction test to obtain relevant data. Instrument model: Intensity data for single crystals of each complex were collected on a BRUKER SMART APEX II CCD detector with graphite-monochromatized Mo K $\alpha$  radiation ( $k = 0.071073$  nm). The structures were solved by direct method using the program SHELXS-97 and subsequent Fourier difference techniques, and refined anisotropically by full matrix least-squares on F2 using SHELXL-97.

## 7. X-ray Structure and Data of **6**

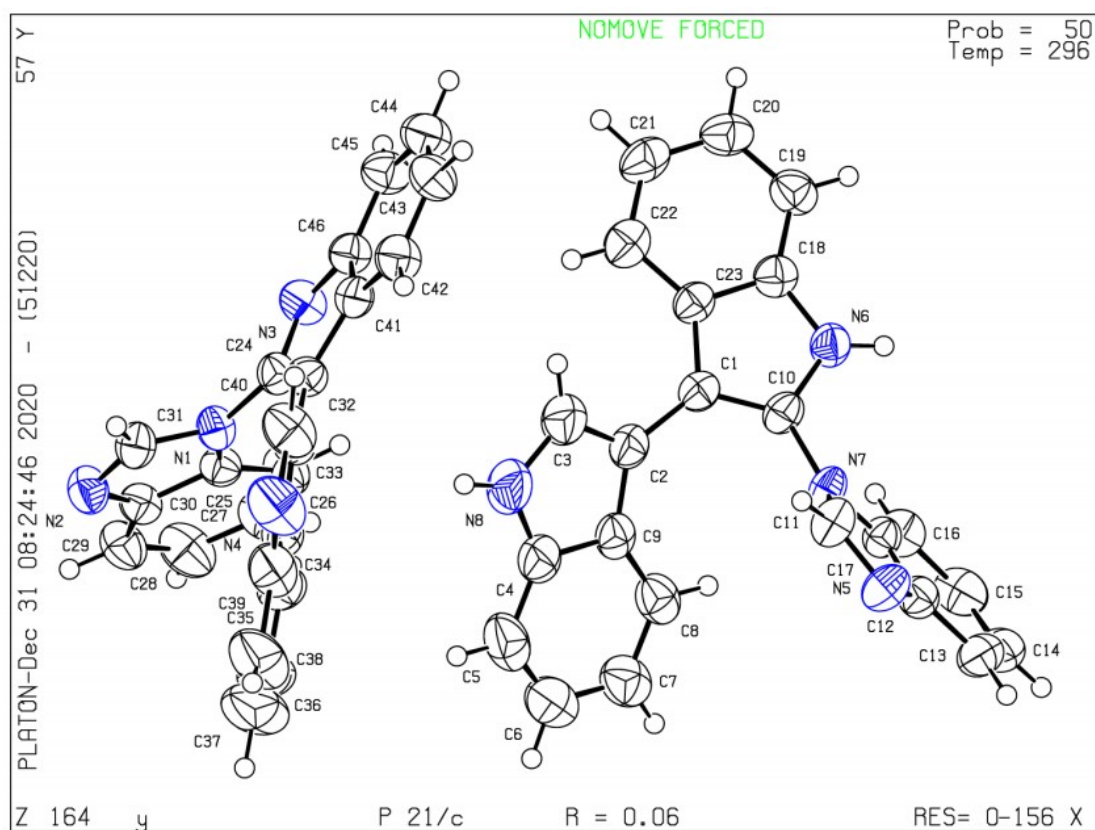

**Figure S3.** X-Ray crystal structure of **6**

**Table S4.** Crystal data and structure refinement for **6****Datablock: y**


---

|                              |                        |                                  |               |
|------------------------------|------------------------|----------------------------------|---------------|
| Bond precision:              | C-C = 0.0063 Å         | Wavelength=0.71073               |               |
| Cell:                        | a=7.196 (5)            | b=19.955 (15)                    | c=24.468 (18) |
|                              | alpha=90               | beta=90.050 (1)                  | gamma=90      |
| Temperature:                 | 296 K                  |                                  |               |
|                              | Calculated             | Reported                         |               |
| Volume                       | 3514 (4)               | 3514 (4)                         |               |
| Space group                  | P 21/c                 | P 21/c                           |               |
| Hall group                   | -P 2ybc                | -P 2ybc                          |               |
| Moiety formula               | C23 H15 N4, C23 H16 N4 | ?                                |               |
| Sum formula                  | C46 H31 N8             | C46 H31 N8                       |               |
| Mr                           | 695.79                 | 695.79                           |               |
| Dx, g cm <sup>-3</sup>       | 1.315                  | 1.315                            |               |
| Z                            | 4                      | 4                                |               |
| Mu (mm <sup>-1</sup> )       | 0.080                  | 0.080                            |               |
| F000                         | 1452.0                 | 1452.0                           |               |
| F000'                        | 1452.48                |                                  |               |
| h, k, lmax                   | 8, 24, 30              | 8, 24, 30                        |               |
| Nref                         | 6885                   | 6548                             |               |
| Tmin, Tmax                   | 0.986, 0.990           |                                  |               |
| Tmin'                        | 0.986                  |                                  |               |
| Correction method= Not given |                        |                                  |               |
| Data completeness=           | 0.951                  | Theta(max)= 25.999               |               |
| R(reflections)=              | 0.0621 ( 2035)         | wR2(reflections)= 0.1289 ( 6548) |               |
| S =                          | 0.757                  | Npar= 487                        |               |

---

Compound **6** (50 mg) was added to a 10 mL sample bottle, following to add DCM (2 mL), n-hexane (2.5 mL) and toluene (0.1 mL), then seal the bottle with a parafilm, and poke 15 small holes on the parafilm, place the sample bottle in a safe place to allow it to volatilize and separate out the single crystal. Take out the single crystal and send it for single crystal diffraction test to obtain relevant data. Instrument model: Intensity data for single crystals of each complex were collected on a BRUKER SMART APEX II CCD detector with graphite-monochromatized Mo K $\alpha$  radiation ( $k = 0.071073$  nm). The structures were solved by direct method using the program SHELXS-97 and subsequent Fourier difference techniques, and refined anisotropically by full matrix least-squares on F2 using SHELXL-97.

## 8. $^1\text{H}$ NMR and $^{13}\text{C}$ NMR Spectra of These Compounds

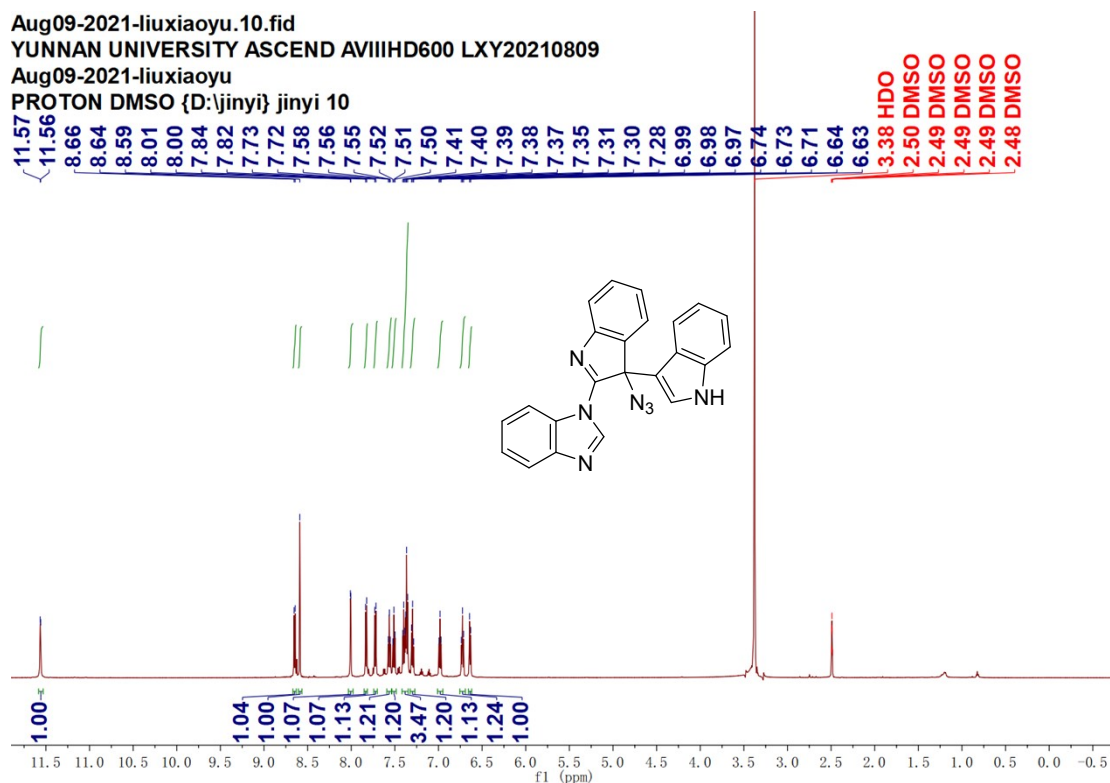

$^1\text{H}$ -NMR (600 MHz, DMSO) Spectra of compound **3a**

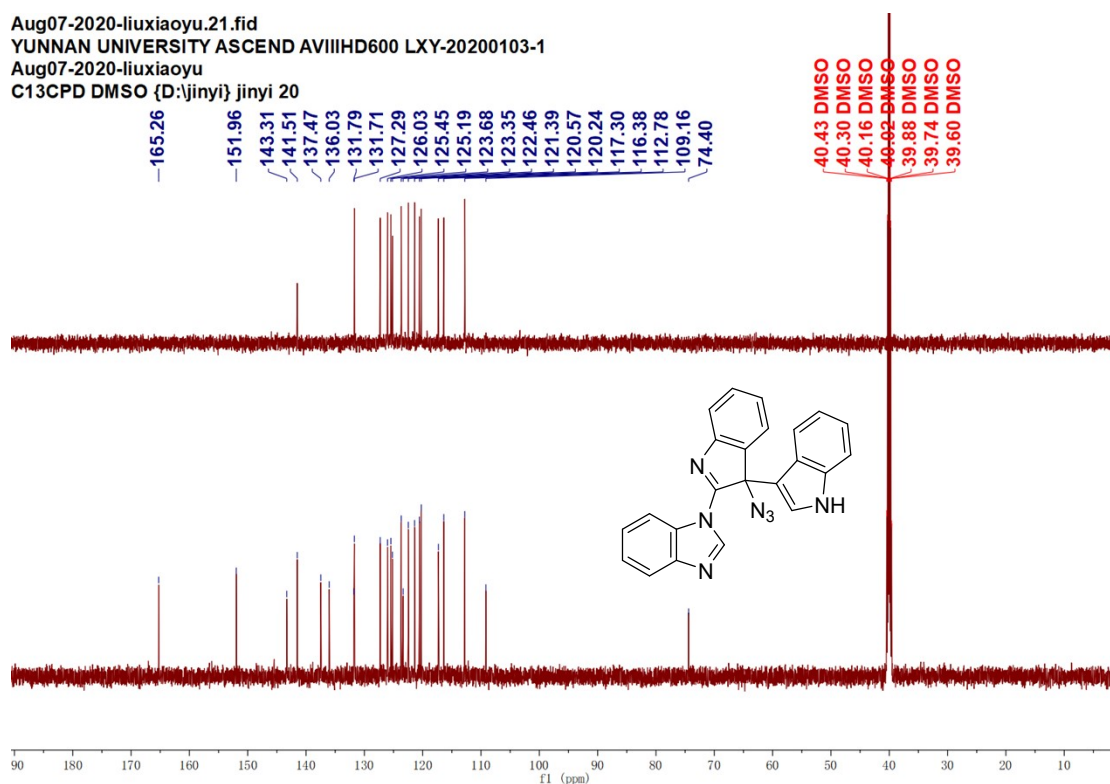

$^{13}\text{C}$ -NMR (151 MHz, DMSO) Spectra of compound **3a**



Jun12-2020-liuxiaoyu.60.fid  
 YUNNAN UNIVERSITY ASCEND AVIIIHD600 LXIY-20200611D  
 Jun12-2020-liuxiaoyu  
 PROTON DMSO {D:jinyi} jinyi 18

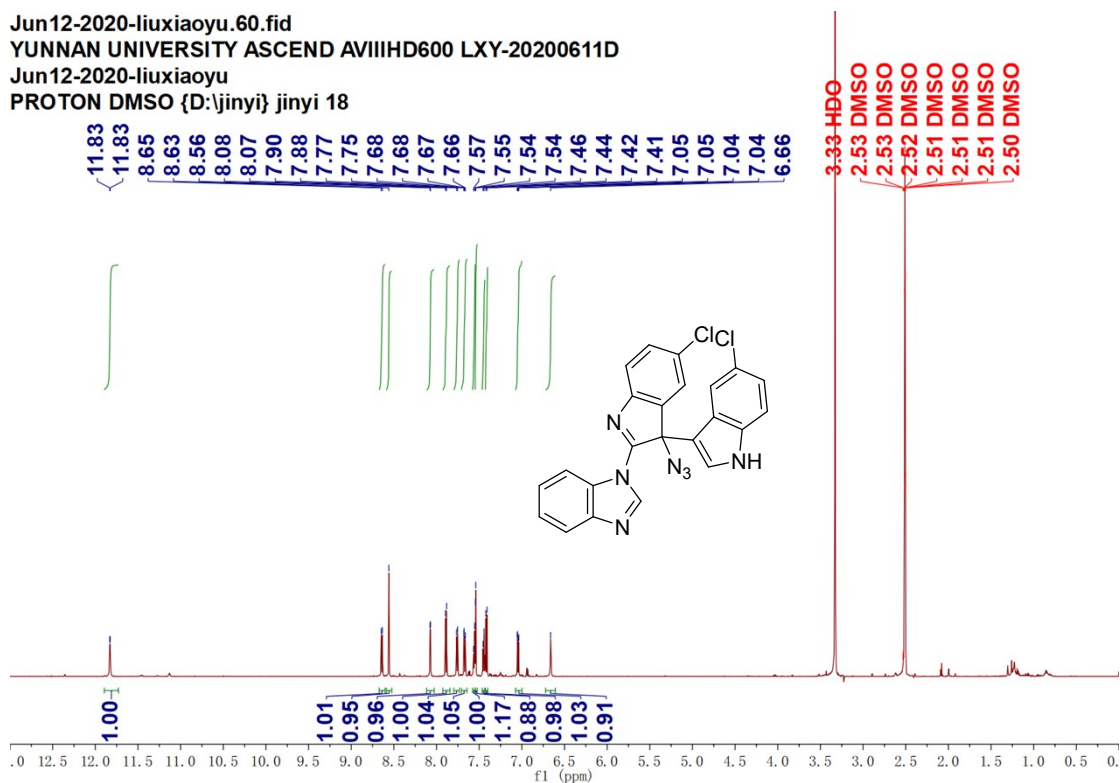

Jun12-2020-liuxiaoyu.61.fid  
 YUNNAN UNIVERSITY ASCEND AVIIIHD600 LXIY-20200611D  
 Jun12-2020-liuxiaoyu  
 C13CPD DMSO {D:jinyi} jinyi 18

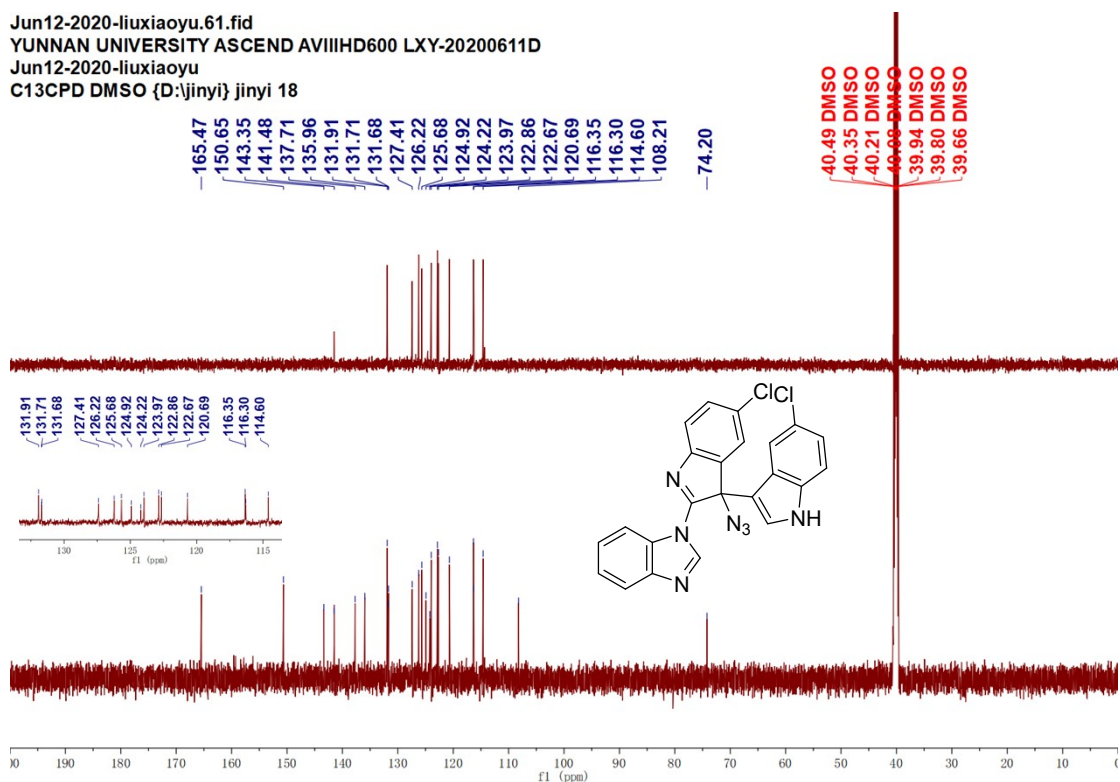

Aug10-2021-liuxiaoyu.10.fid  
 YUNNAN UNIVERSITY ASCEND AVIIIHD600 LX Y20200606-1  
 Aug10-2021-liuxiaoyu  
 PROTON DMSO {D:jinyi} jinyi 10

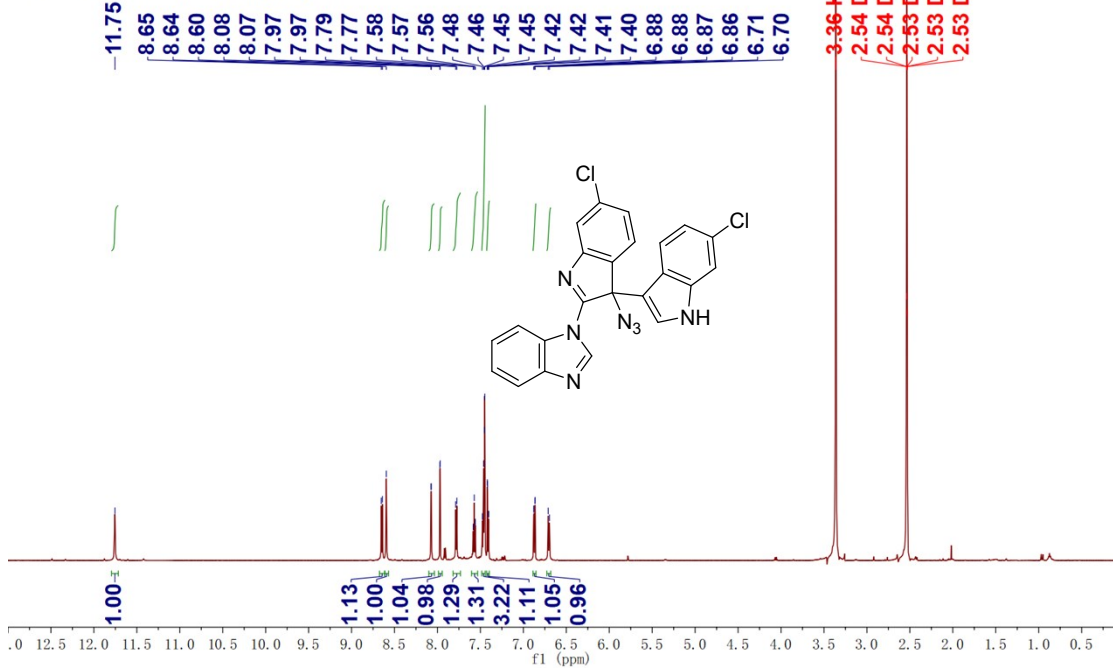

<sup>1</sup>H-NMR (600 MHz, DMSO) Spectra of compound **3c**

Jun08-2020-liuxiaoyu.61.fid  
 YUNNAN UNIVERSITY ASCEND AVIIIHD600 LX Y20200606  
 Jun08-2020-liuxiaoyu  
 C13CPD DMSO {D:jinyi} jinyi 10

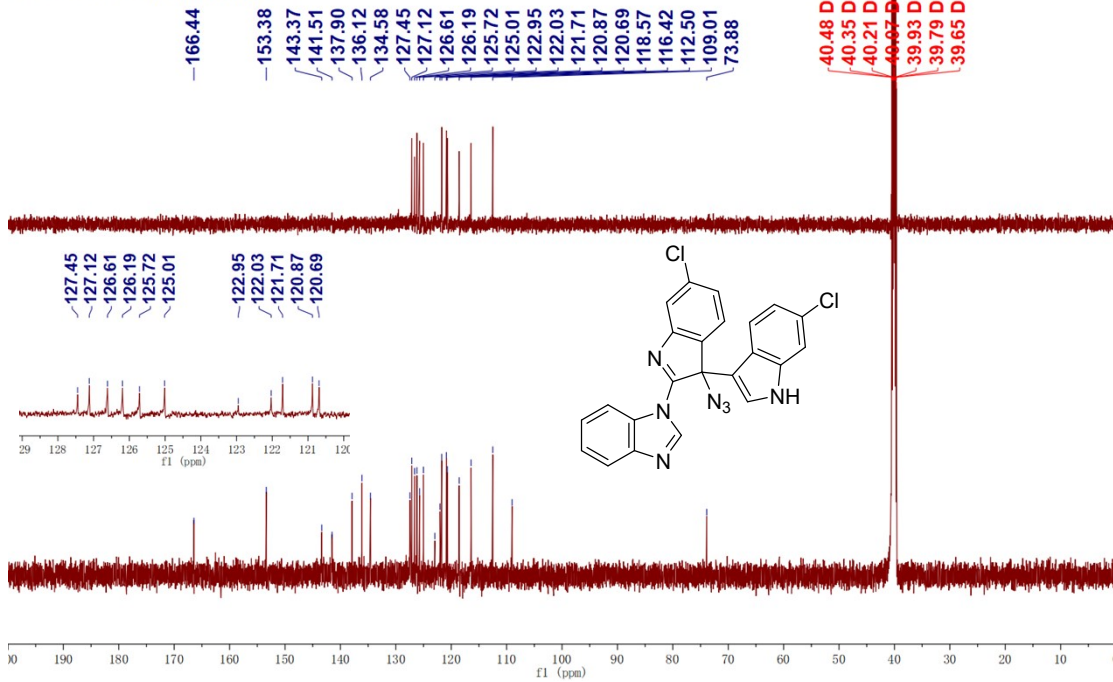

<sup>13</sup>C-NMR (151 MHz, DMSO) Spectra of compound **3c**

Jun12-2020-liuxiaoyu.50.fid  
 YUNNAN UNIVERSITY ASCEND AVIIIHD600 LX-20200611A  
 Jun12-2020-liuxiaoyu  
 PROTON DMSO {D:jinyi} jinyi 17

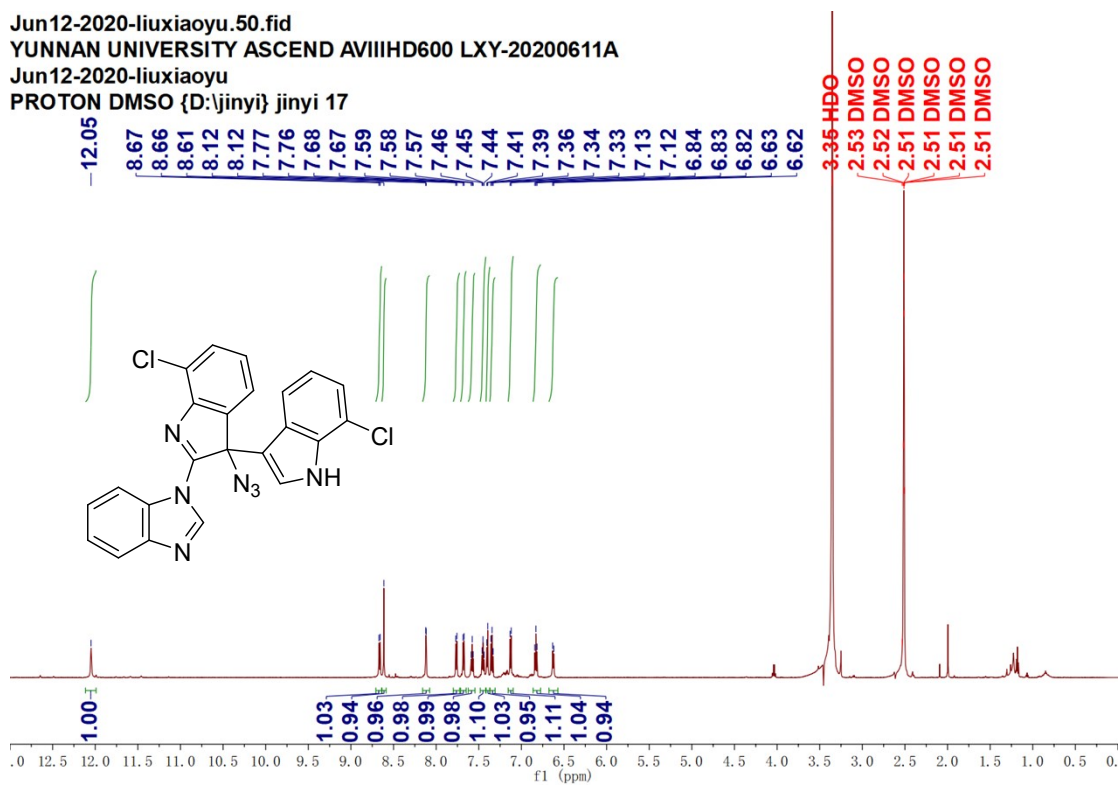

<sup>1</sup>H-NMR (600 MHz, DMSO) Spectra of compound **3d**

Jun12-2020-liuxiaoyu.51.fid  
 YUNNAN UNIVERSITY ASCEND AVIIIHD600 LX-20200611A  
 Jun12-2020-liuxiaoyu  
 C13CPD DMSO {D:jinyi} jinyi 17

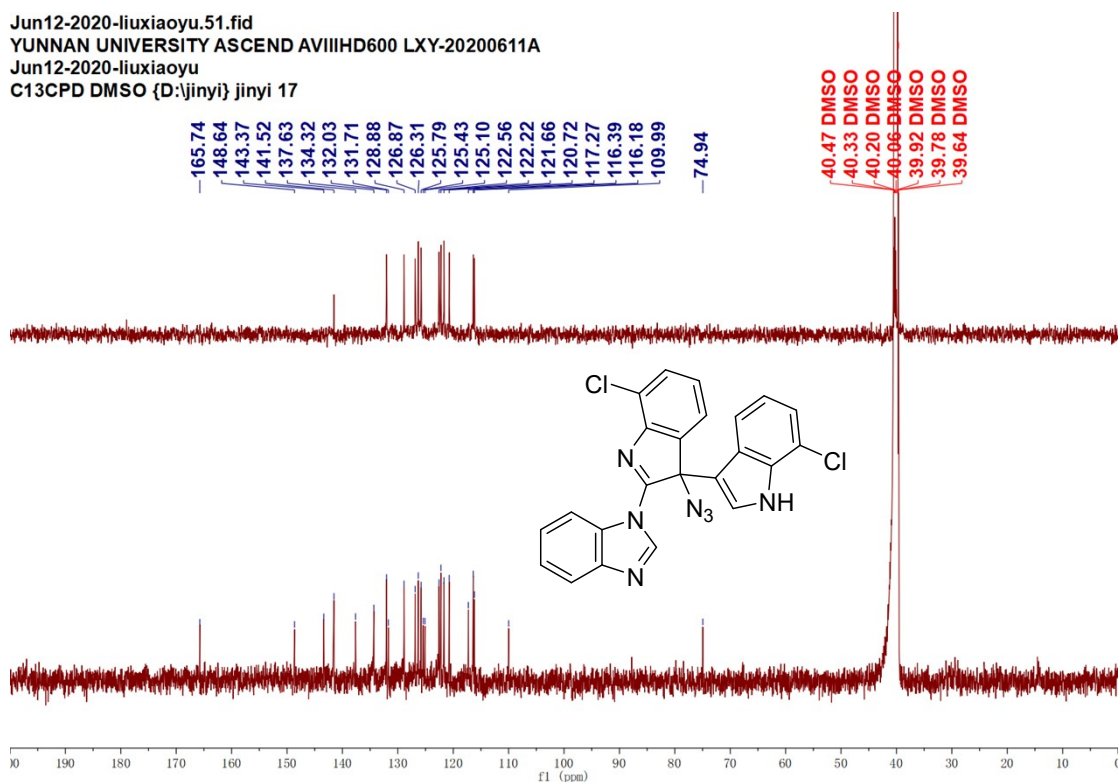

<sup>13</sup>C-NMR (151 MHz, DMSO) Spectra of compound **3d**

Jun24-2020-liuxiaoyu.30.fid  
 YUNNAN UNIVERSITY ASCEND AVIIIHD600 LX-20200622A  
 Jun24-2020-liuxiaoyu  
 PROTON DMSO {D:jinyi} jinyi 22

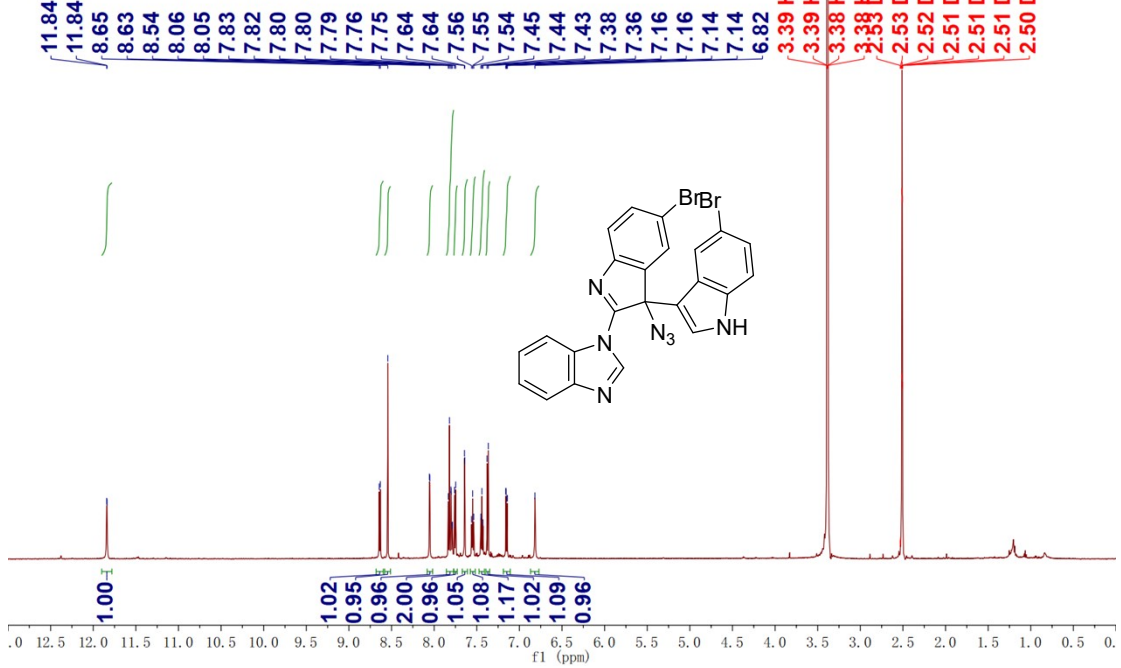

<sup>1</sup>H-NMR (600 MHz, DMSO) Spectra of compound 3e

Jun24-2020-liuxiaoyu.31.fid  
 YUNNAN UNIVERSITY ASCEND AVIIIHD600 LX-20200622A  
 Jun24-2020-liuxiaoyu  
 C13CPD DMSO {D:jinyi} jinyi 22

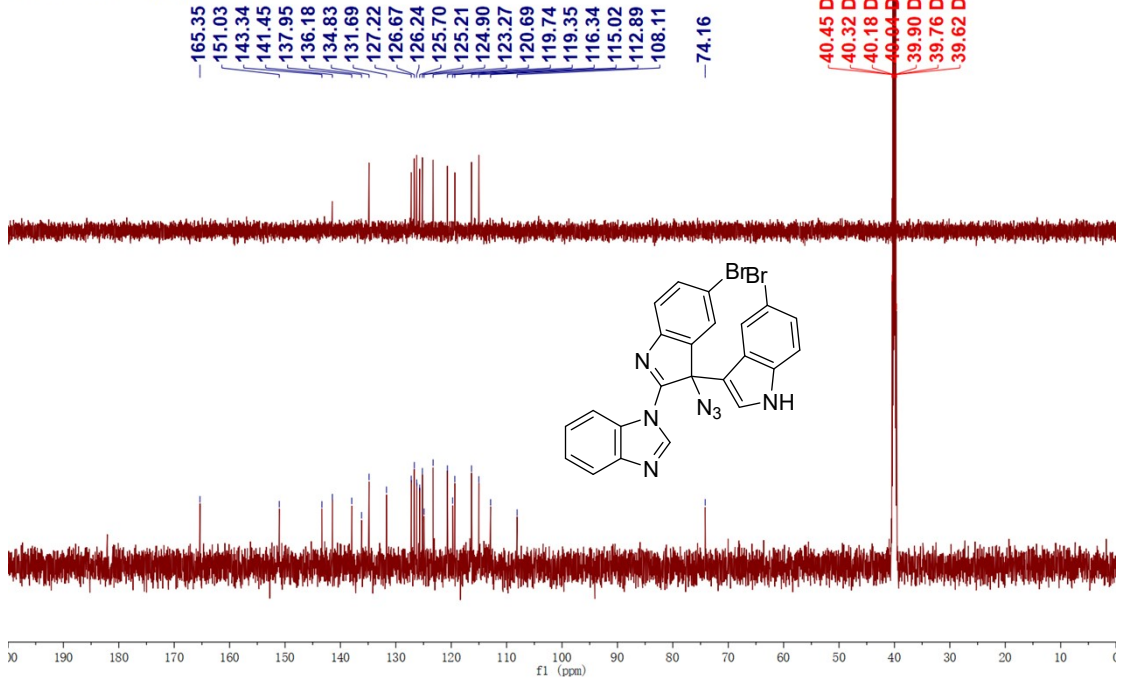

<sup>13</sup>C-NMR (151 MHz, DMSO) Spectra of compound 3e

Jun18-2020-liuxiaoyu.50.fid  
 YUNNAN UNIVERSITY ASCEND AVIIIHD600 LX Y20200617B  
 Jun18-2020-liuxiaoyu  
 PROTON DMSO {D:ljinyi} jinyi 21

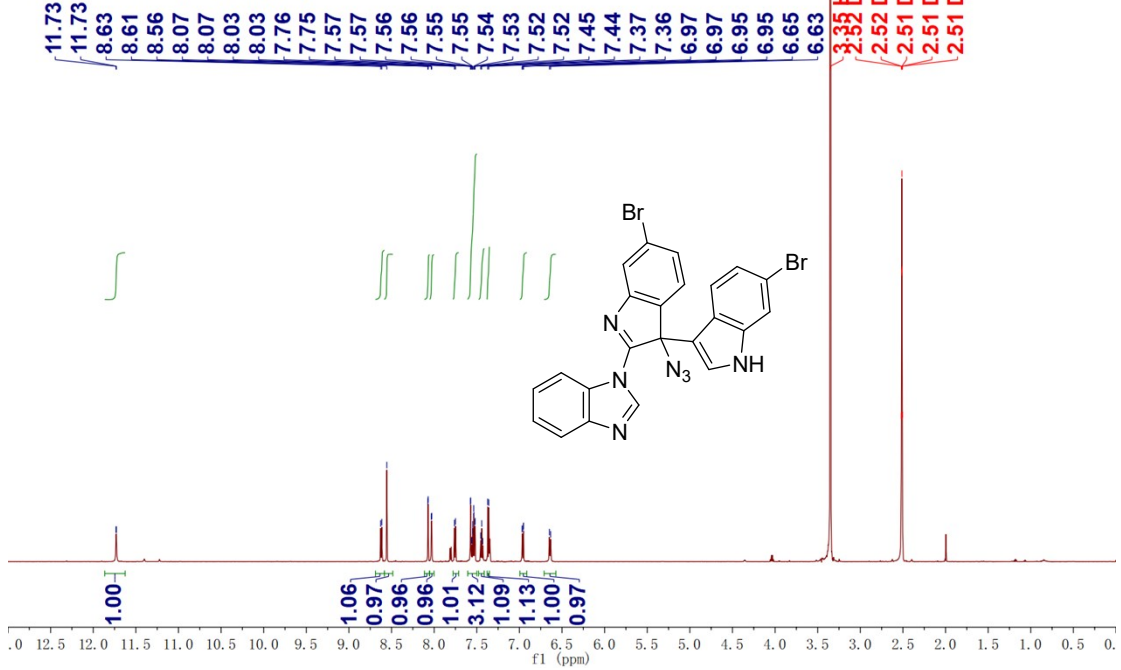

<sup>1</sup>H-NMR (600 MHz, DMSO) Spectra of compound 3f

Jun18-2020-liuxiaoyu.51.fid  
 YUNNAN UNIVERSITY ASCEND AVIIIHD600 LX Y20200617B  
 Jun18-2020-liuxiaoyu  
 C13CPD DMSO {D:ljinyi} jinyi 21

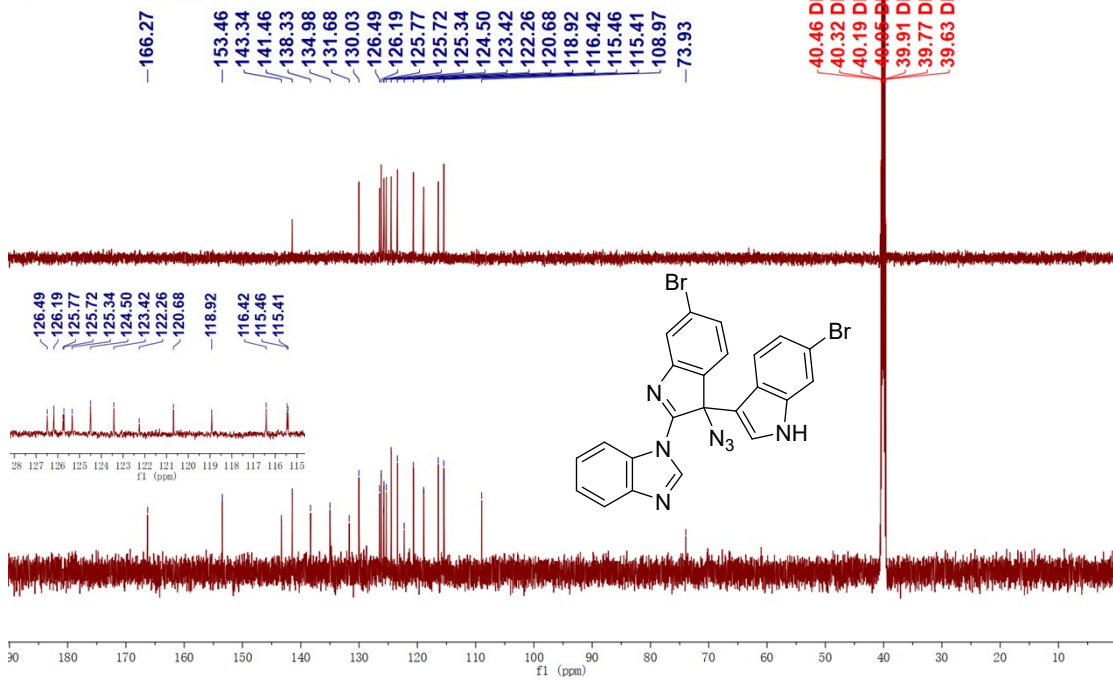

<sup>13</sup>C-NMR (151 MHz, DMSO) Spectra of compound 3f

Jun16-2020-liuxiaoyu.10.fid  
 YUNNAN UNIVERSITY ASCEND AVIIIHD600 LX Y-20200615A  
 Jun16-2020-liuxiaoyu  
 PROTON DMSO {D:jinyi} jinyi 20

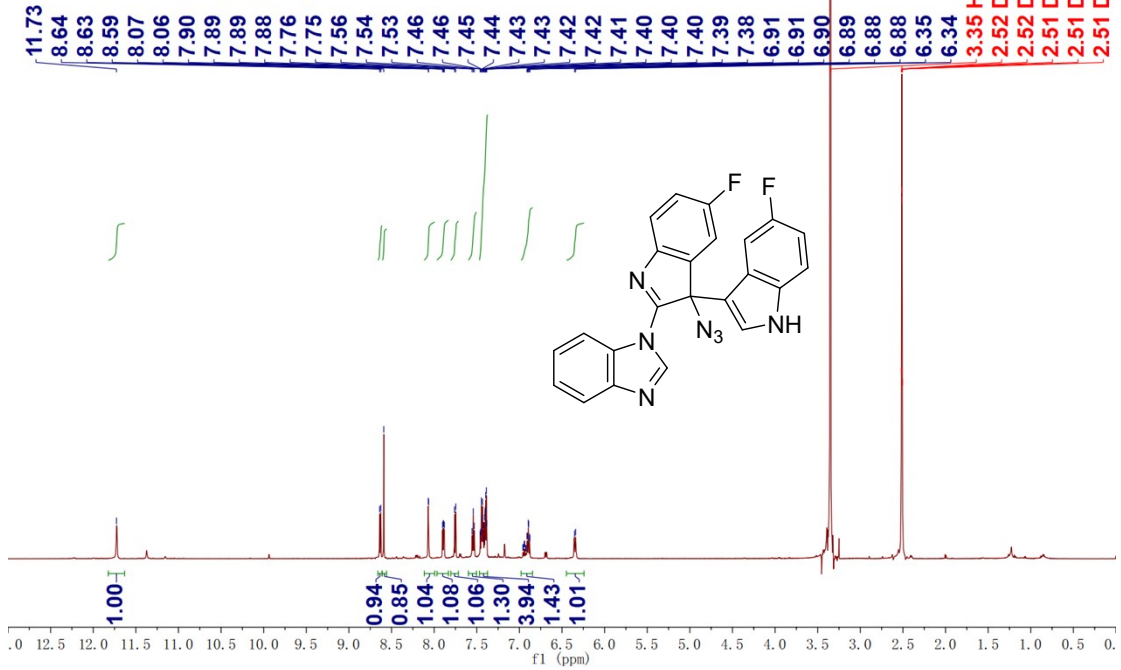

<sup>1</sup>H-NMR (600 MHz, DMSO) Spectra of compound **3g**

Jun16-2020-liuxiaoyu.31.fid  
 YUNNAN UNIVERSITY ASCEND AVIIIHD600 LX Y-20200615A  
 Jun16-2020-liuxiaoyu  
 C13CPD DMSO

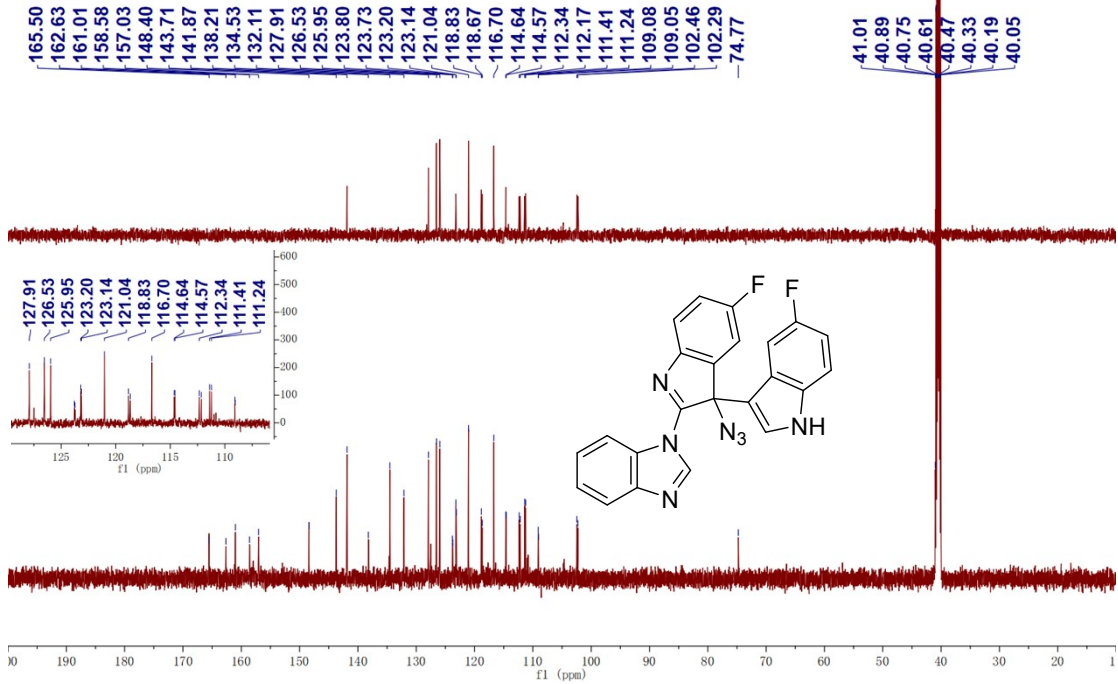

<sup>13</sup>C-NMR (151 MHz, DMSO) Spectra of compound **3g**

Nov13-2020-liuxiaoyu.20.fid  
YUNNAN UNIVERSITY ASCEND AVIIIHD600 LXY20200615-2  
Nov13-2020-liuxiaoyu  
F19CPD DMSO {D:\jinyi} jinyi 2

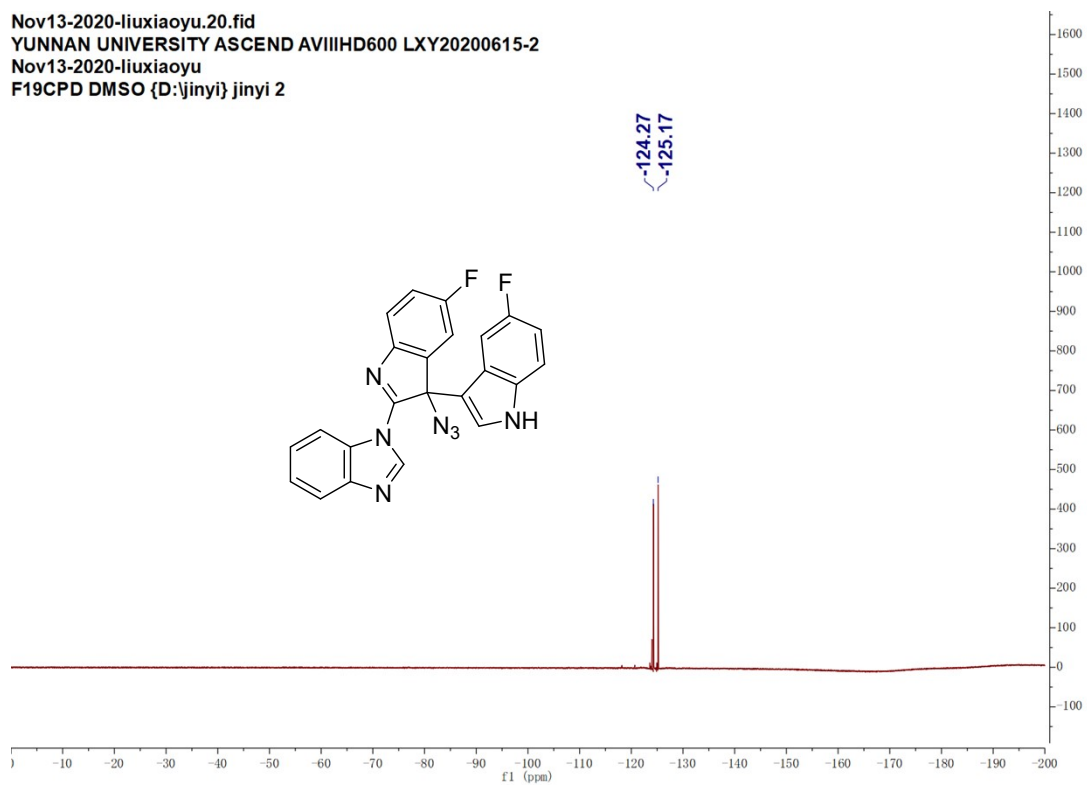

$^{19}\text{F}$ -NMR (565MHz, DMSO) spectrum of compound **3g**

Jun15-2020-liuxiaoyu.11.fid  
 YUNNAN UNIVERSITY ASCEND AVIIIHD600 LX Y20200612  
 Jun15-2020-liuxiaoyu  
 PROTON DMSO {D:jinyi} jinyi 12

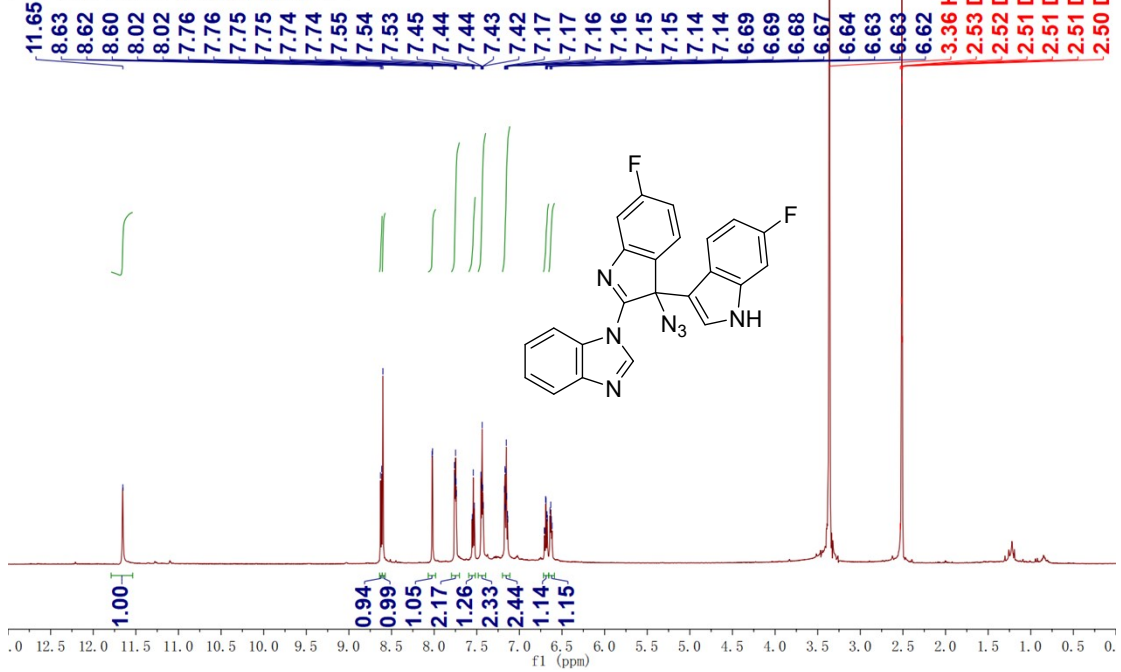

<sup>1</sup>H-NMR (600 MHz, DMSO) Spectra of compound **3h**

Jun15-2020-liuxiaoyu.13.fid  
 YUNNAN UNIVERSITY ASCEND AVIIIHD600 LX Y20200612  
 Jun15-2020-liuxiaoyu  
 C13CPD DMSO {D:jinyi} jinyi 12

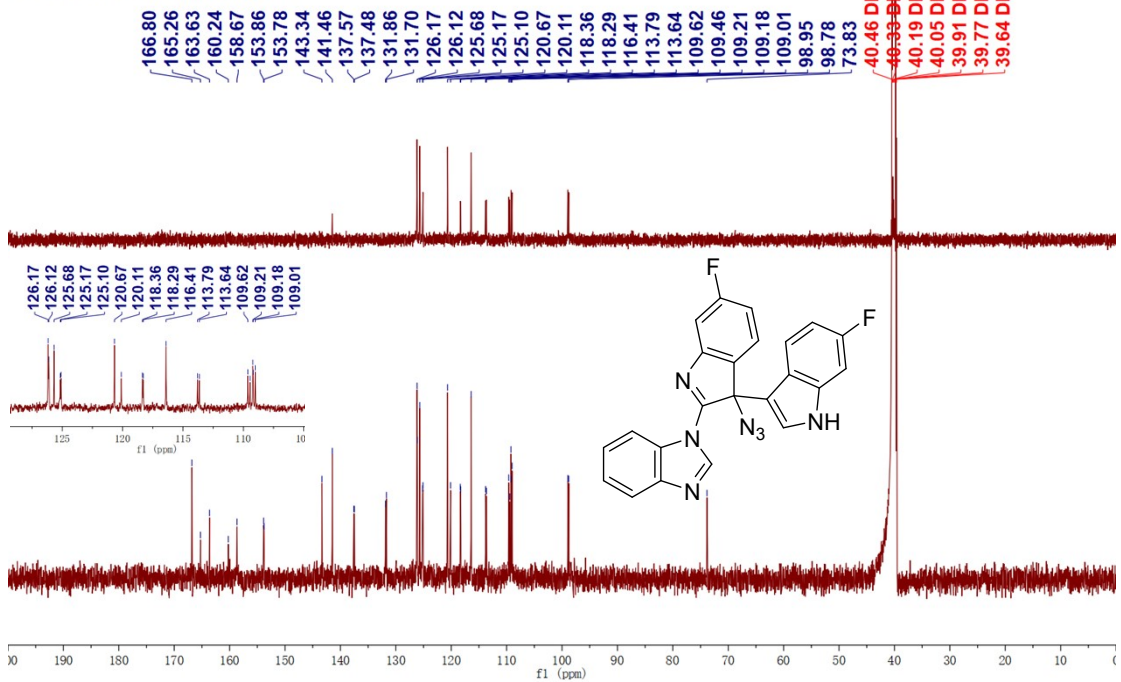

<sup>13</sup>C-NMR (151 MHz, DMSO) Spectra of compound **3h**



Nov13-2020-liuxiaoyu.10.fid  
YUNNAN UNIVERSITY ASCEND AVIIIHD600 LXIY20200612-2  
Nov13-2020-liuxiaoyu  
F19CPD DMSO {D:\jinyi} jinyi 1

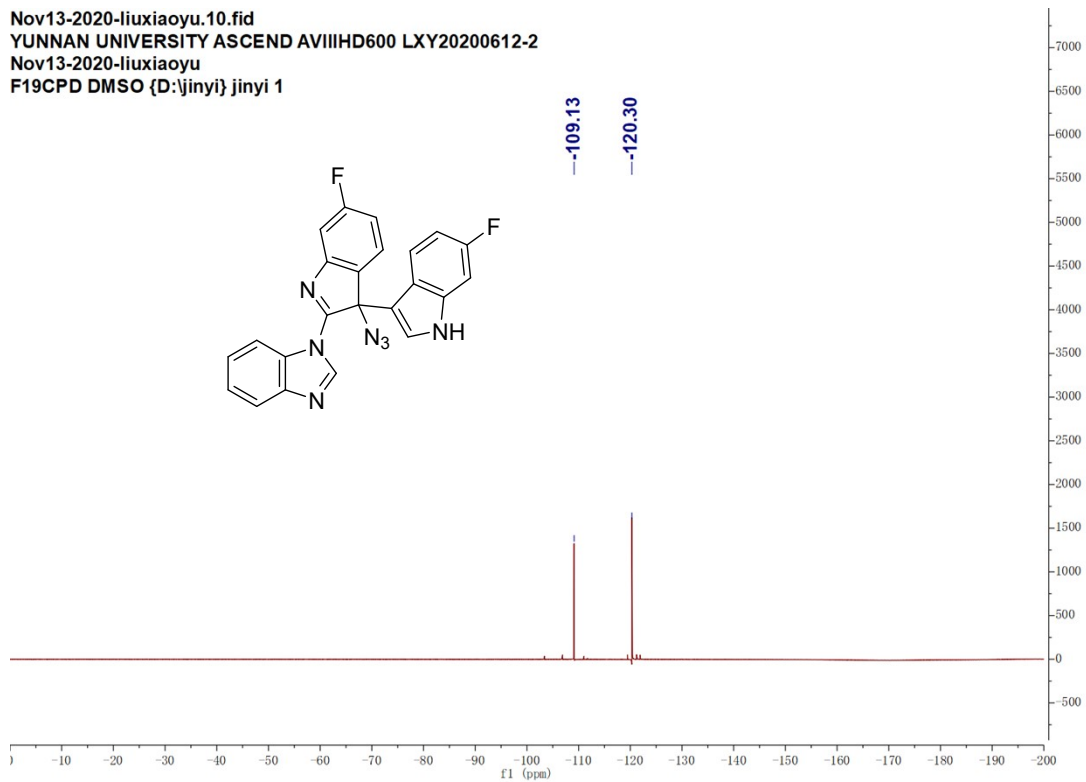

$^{19}\text{F}$ -NMR (565MHz, DMSO) spectrum of compound **3h**

Jun05-2020-liuxiaoyu.10.fid  
 YUNNAN UNIVERSITY ASCEND AVIIIHD600 LX-20200604  
 Jun05-2020-liuxiaoyu  
 PROTON DMSO {D:jinyi} jinyi 10

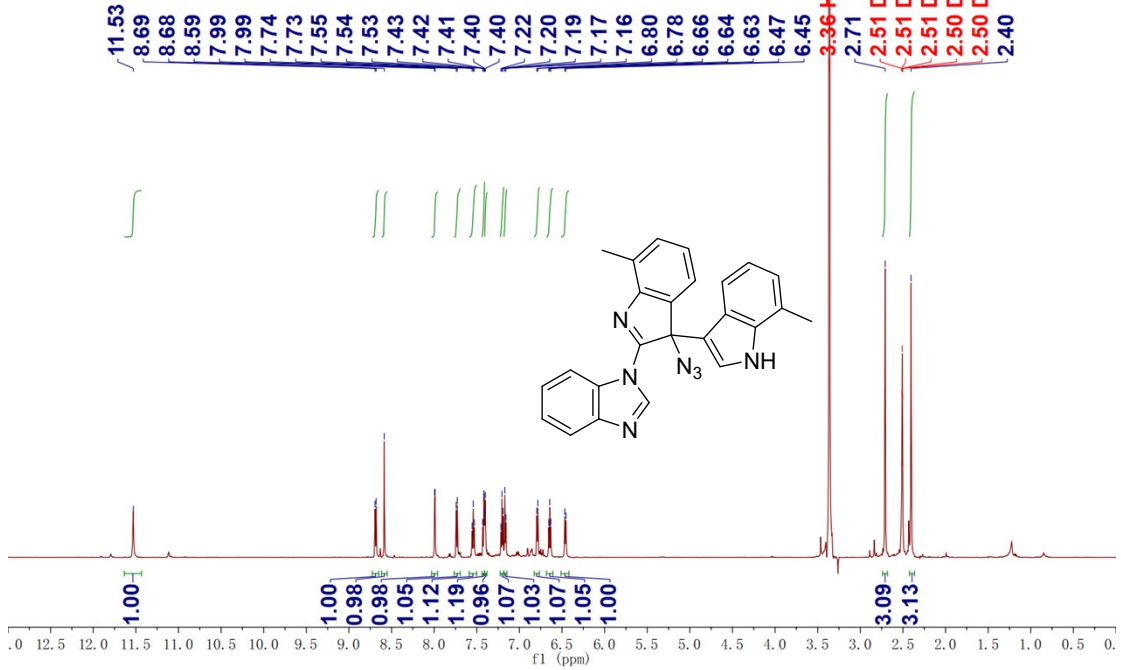

<sup>1</sup>H-NMR (600 MHz, DMSO) Spectra of compound 3i

Jun05-2020-liuxiaoyu.11.fid  
 YUNNAN UNIVERSITY ASCEND AVIIIHD600 LX-20200604  
 Jun05-2020-liuxiaoyu  
 C13CPD DMSO {D:jinyi} jinyi 10

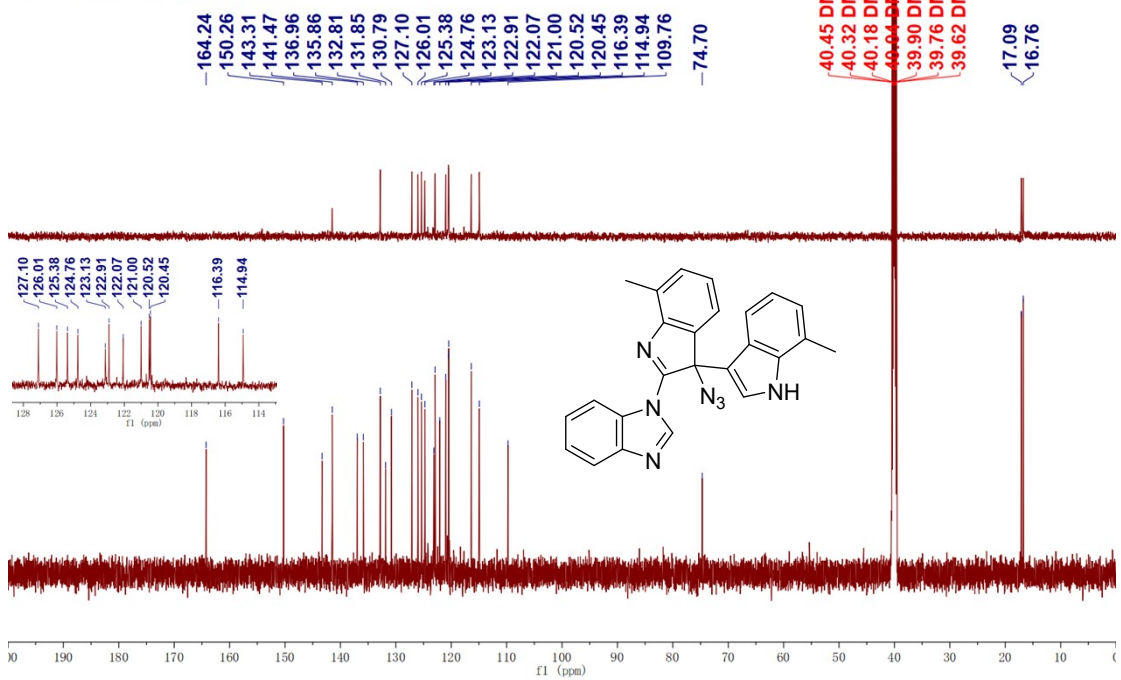

<sup>13</sup>C-NMR (151 MHz, DMSO) Spectra of compound 3i

Jun08-2020-liuxiaoyu.50.fid  
 YUNNAN UNIVERSITY ASCEND AVIIIHD600 LXY20200605  
 Jun08-2020-liuxiaoyu  
 PROTON DMSO {D:jinyi} jinyi 9

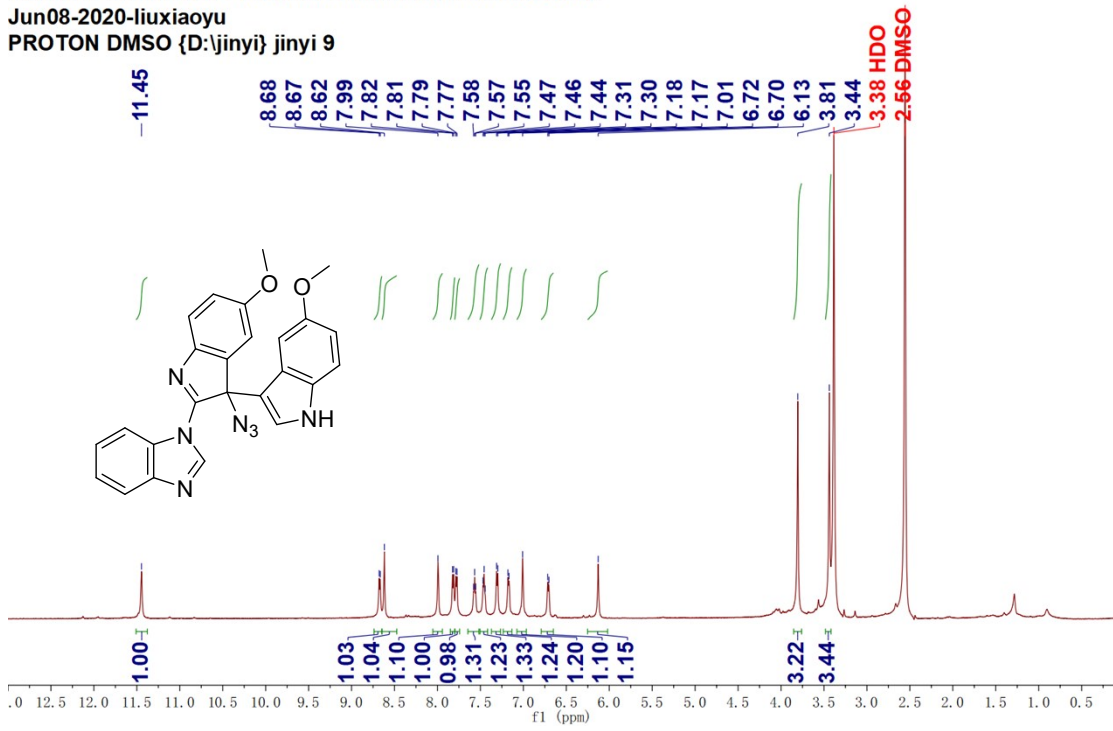

<sup>1</sup>H-NMR (600 MHz, DMSO) Spectra of compound 3j

Jun08-2020-liuxiaoyu.51.fid  
 YUNNAN UNIVERSITY ASCEND AVIIIHD600 LXY20200605  
 Jun08-2020-liuxiaoyu  
 C13CPD DMSO {D:jinyi} jinyi 9

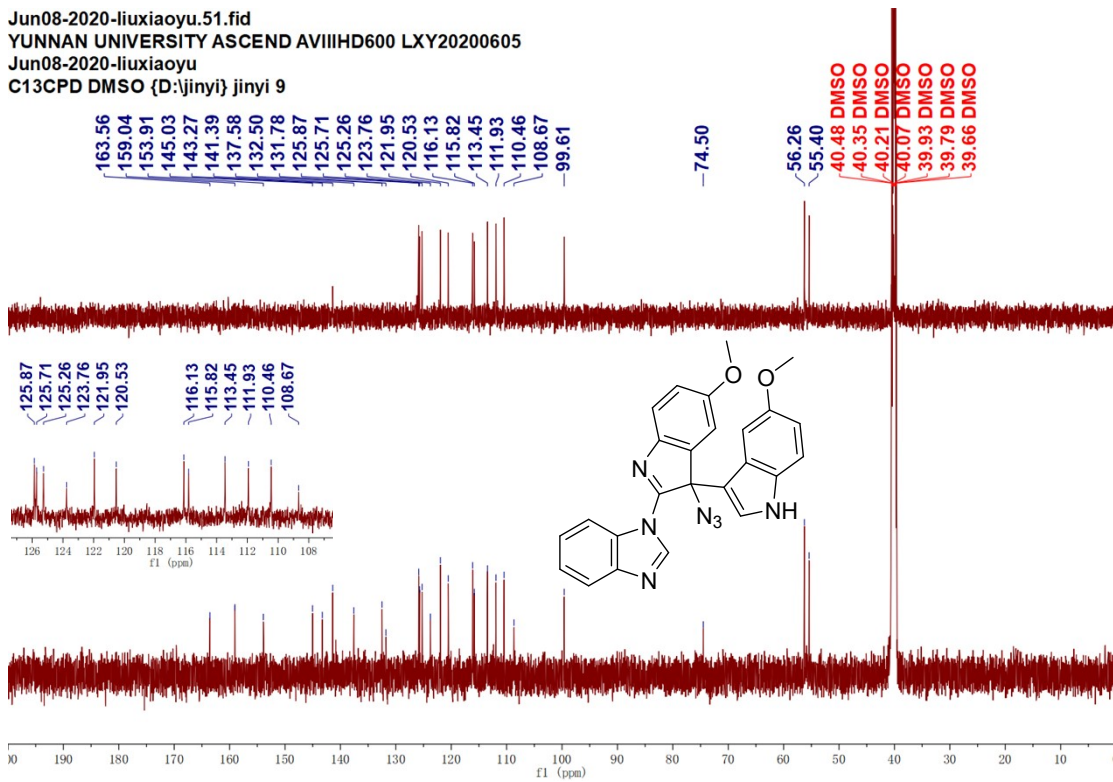

<sup>13</sup>C-NMR (151 MHz, DMSO) Spectra of compound 3j

Jun22-2020-liuxiaoyu.21.fid  
 YUNNAN UNIVERSITY ASCEND AVIIIHD600 LX-20200619B  
 PROTON DMSO {D:jinyi} jinyi 21

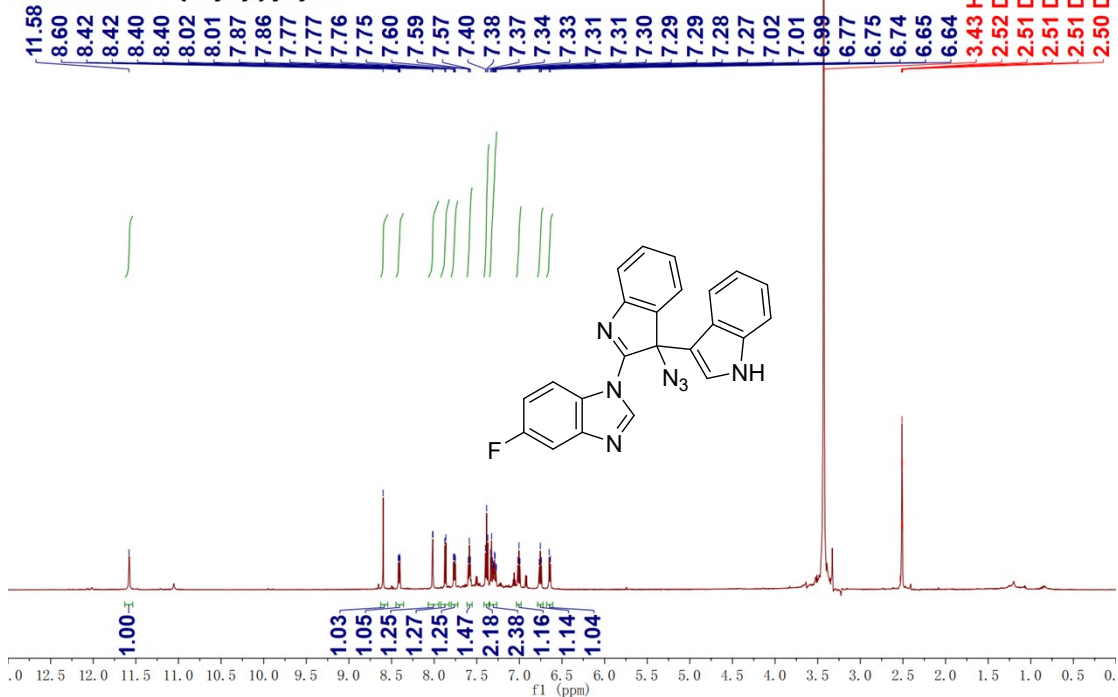

<sup>1</sup>H-NMR (600 MHz, DMSO) Spectra of compound **3k**

Jun22-2020-liuxiaoyu.22.fid  
 YUNNAN UNIVERSITY ASCEND AVIIIHD600 LX-20200619B  
 C13CPD DMSO {D:jinyi} jinyi 21

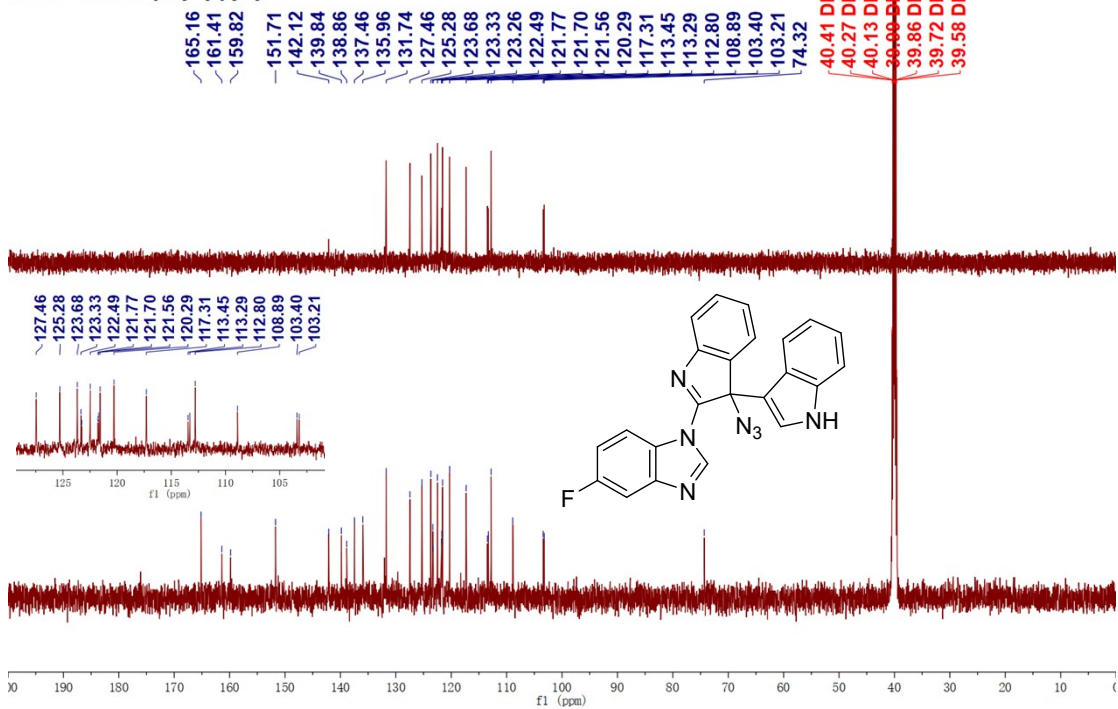

<sup>13</sup>C-NMR (151 MHz, DMSO) Spectra of compound **3k**

系列谱图.41.fid  
YUNNAN UNIVERSITY ASCEND AVIIIHD600 LXY-20200619B  
F19 DMSO {D:\jinyi\jinyi 7

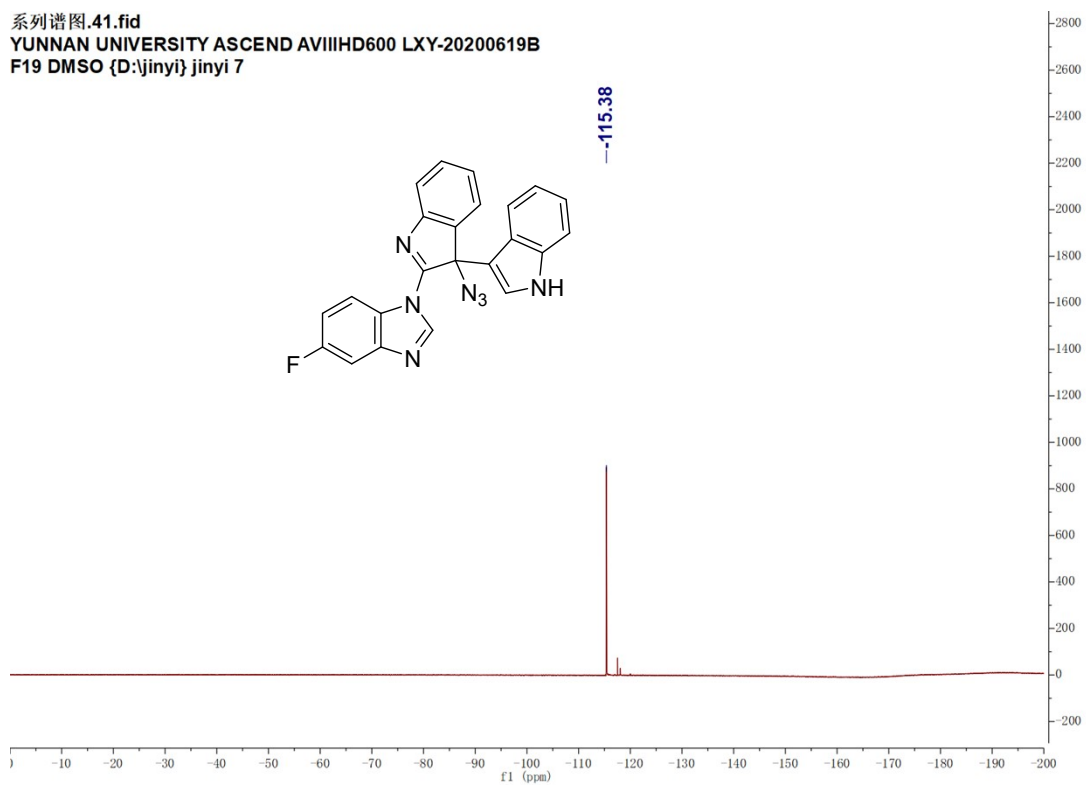

$^{19}\text{F}$ -NMR (565MHz, DMSO) spectrum of compound **3k**

Jun23-2020-liuxiaoyu.10.fid  
 YUNNAN UNIVERSITY ASCEND AVIIIHD600 LX-20200621A  
 PROTON DMSO {D:l:jinyi} jinyi 1

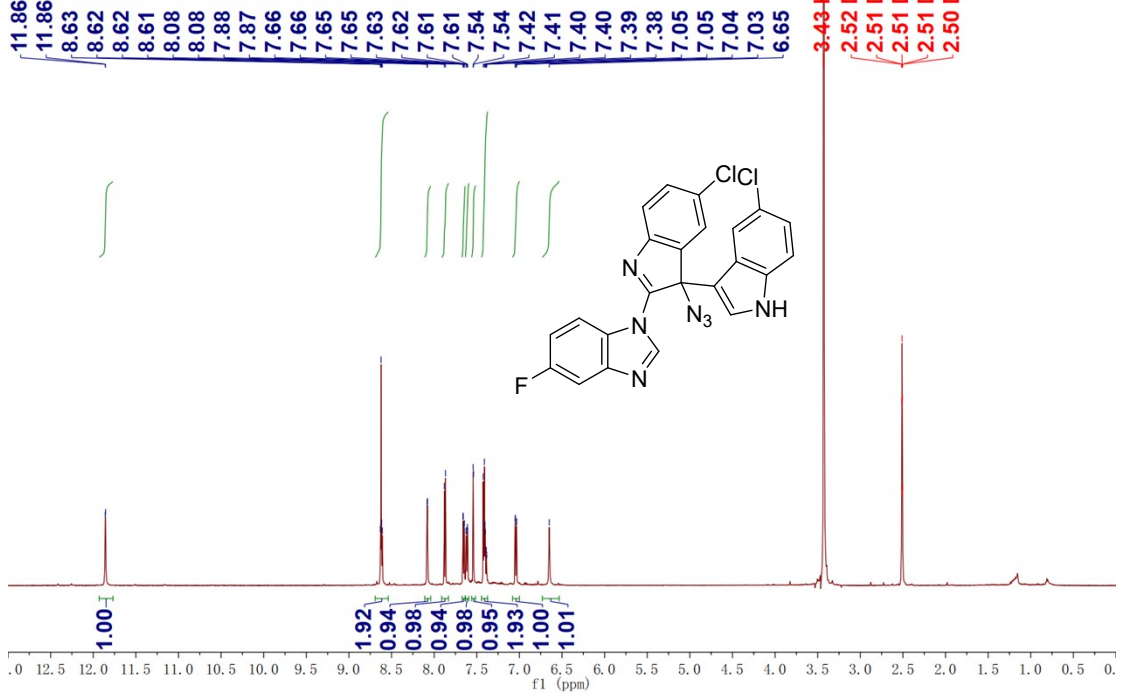

<sup>1</sup>H-NMR (600 MHz, DMSO) Spectra of compound 31

Jun23-2020-liuxiaoyu.11.fid  
 YUNNAN UNIVERSITY ASCEND AVIIIHD600 LX-20200621A  
 C13CPD DMSO {D:l:jinyi} jinyi 1

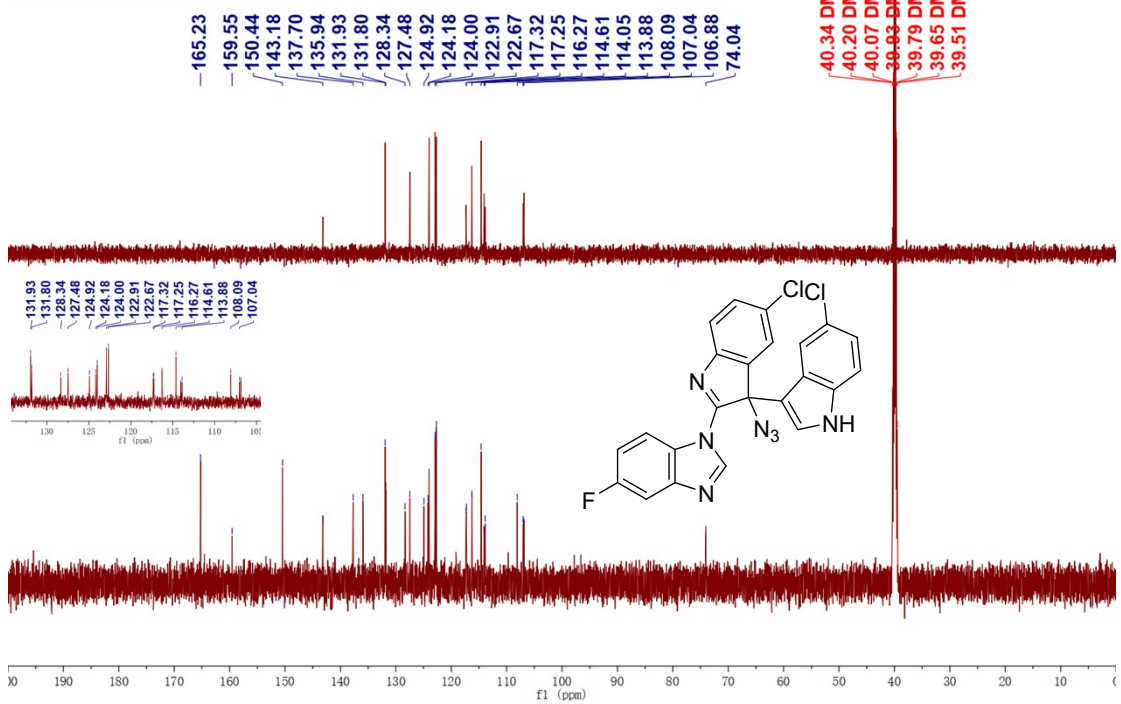

<sup>13</sup>C-NMR (151 MHz, DMSO) Spectra of compound 31

Jun23-2020-liuxiaoyu.13.fid  
YUNNAN UNIVERSITY ASCEND AVIIIHD600 LXY-20200621A  
F19C DMSO {D:\jinyi} jinyi 1

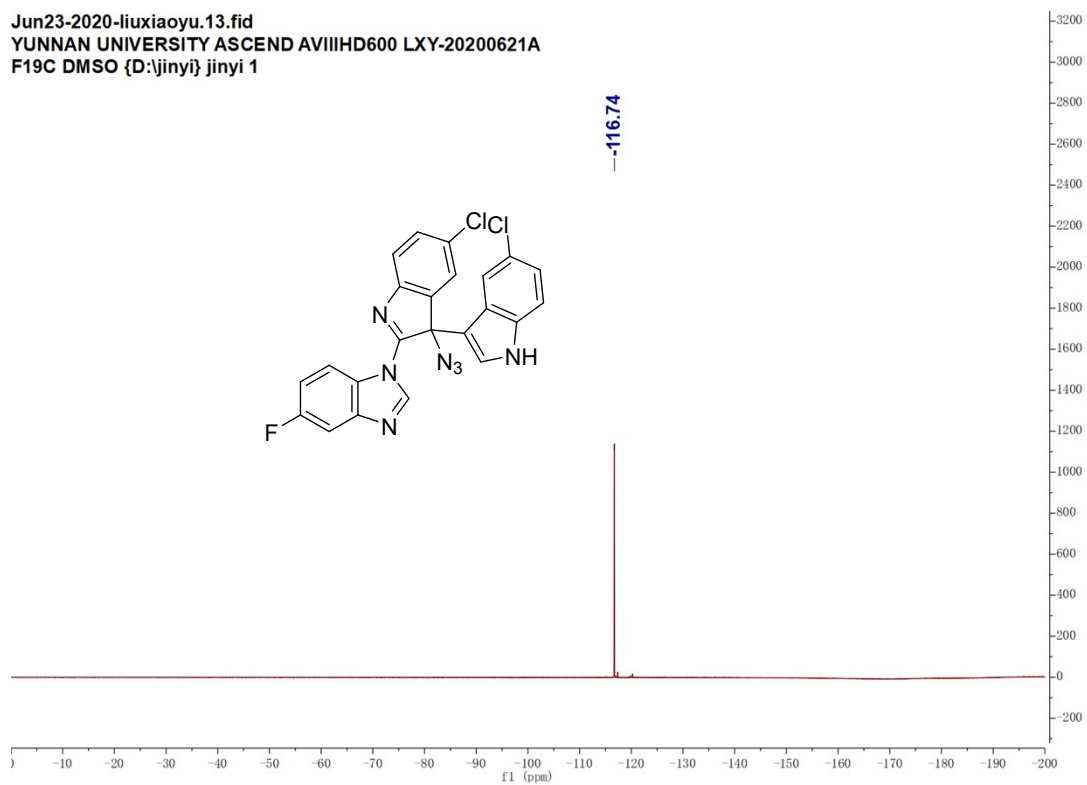

$^{19}\text{F}$ -NMR (565MHz, DMSO) spectrum of compound **31**

Jun22-2020-liuxiaoyu.31.fid  
 YUNNAN UNIVERSITY ASCEND AVIIIHD600 LX-20200619C  
 PROTON DMSO {D:ljinyi} jinyi 22

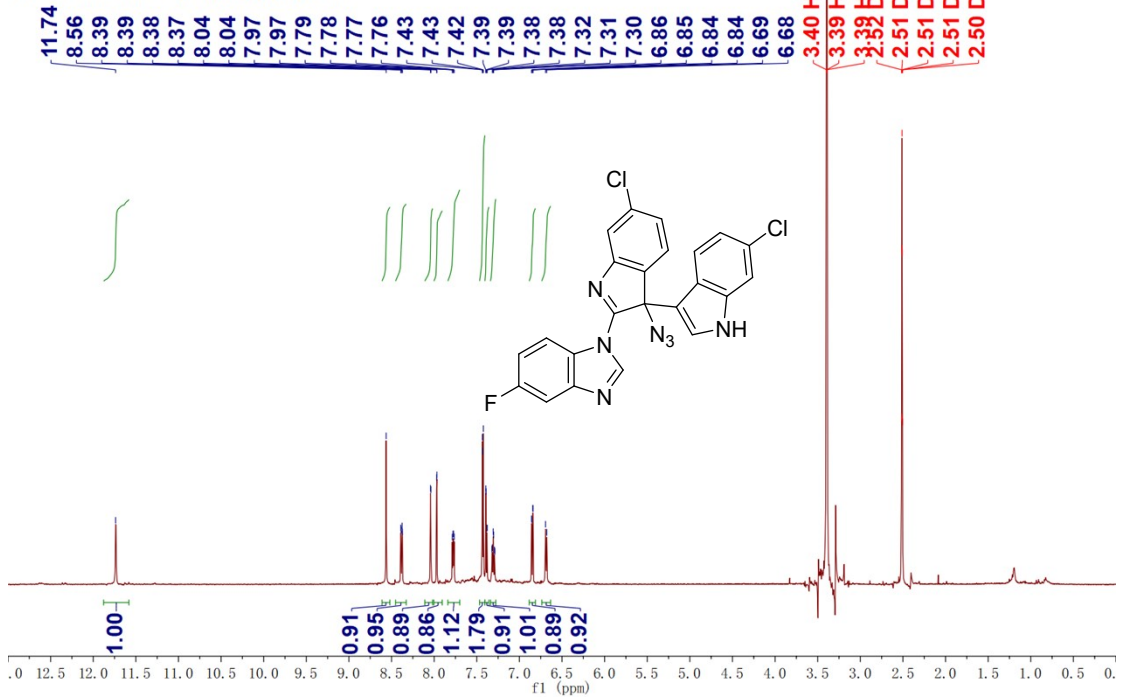

<sup>1</sup>H-NMR (600 MHz, DMSO) Spectra of compound **3m**

Jun22-2020-liuxiaoyu.32.fid  
 YUNNAN UNIVERSITY ASCEND AVIIIHD600 LX-20200619C  
 C13CPD DMSO {D:ljinyi} jinyi 22

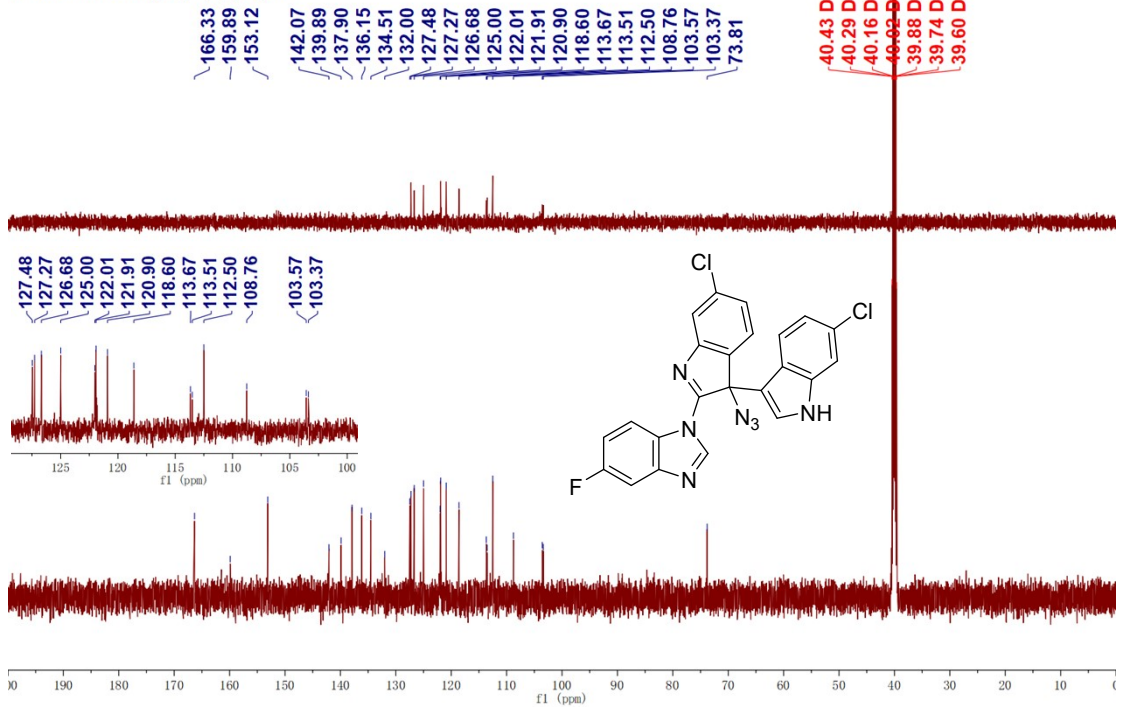

<sup>13</sup>C-NMR (151 MHz, DMSO) Spectra of compound **3m**



系列谱图.61.fid  
YUNNAN UNIVERSITY ASCEND AVIIIHD600 LXY-20200619c  
F19CPD DMSO {D:\jinyi} jinyi 8

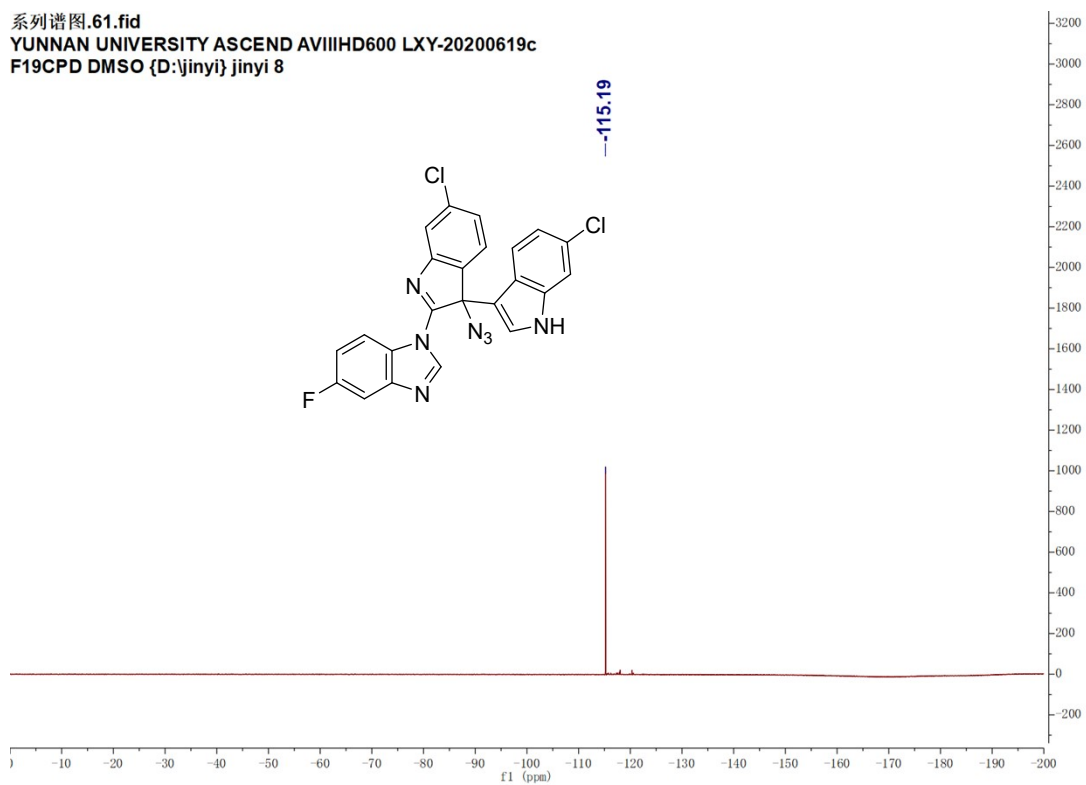

$^{19}\text{F}$ -NMR (565MHz, DMSO) spectrum of compound **3m**

Jun28-2020-liuxiaoyu.10.fid  
 YUNNAN UNIVERSITY ASCEND AVIIIHD600 LX-20200623  
 PROTON DMSO {D:ljinyi} jinyi 22

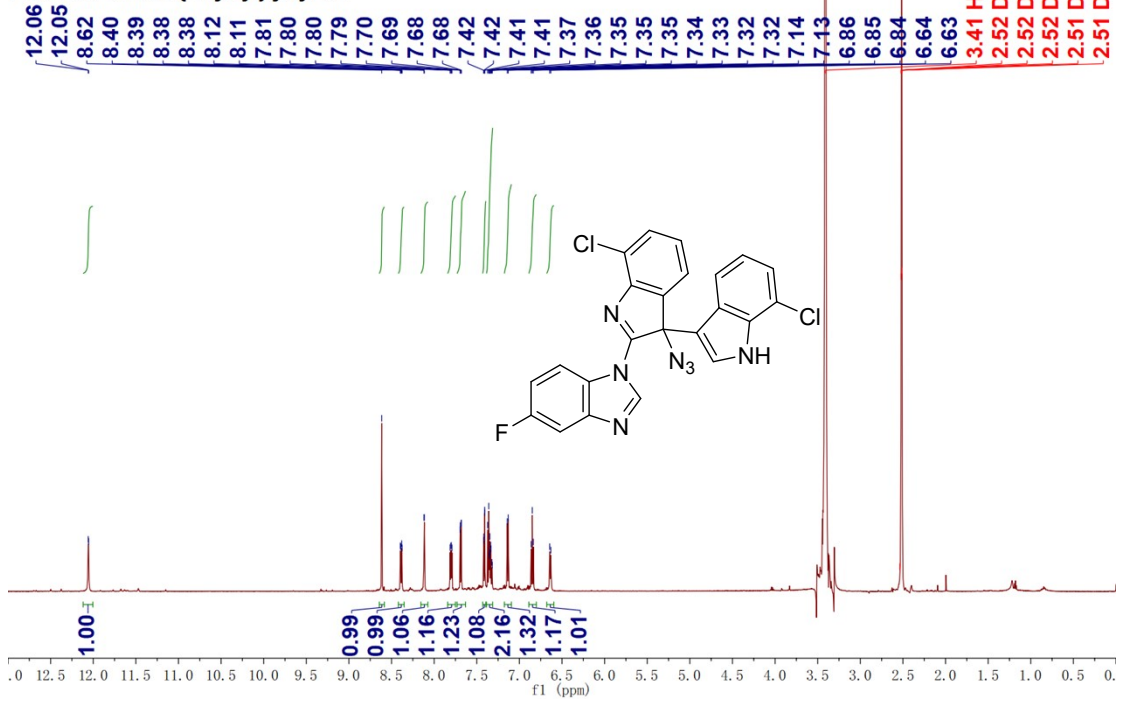

<sup>1</sup>H-NMR (600 MHz, DMSO) Spectra of compound **3n**

Jun28-2020-liuxiaoyu.12.fid  
 YUNNAN UNIVERSITY ASCEND AVIIIHD600 LX-20200623  
 C13CPD DMSO {D:ljinyi} jinyi 22

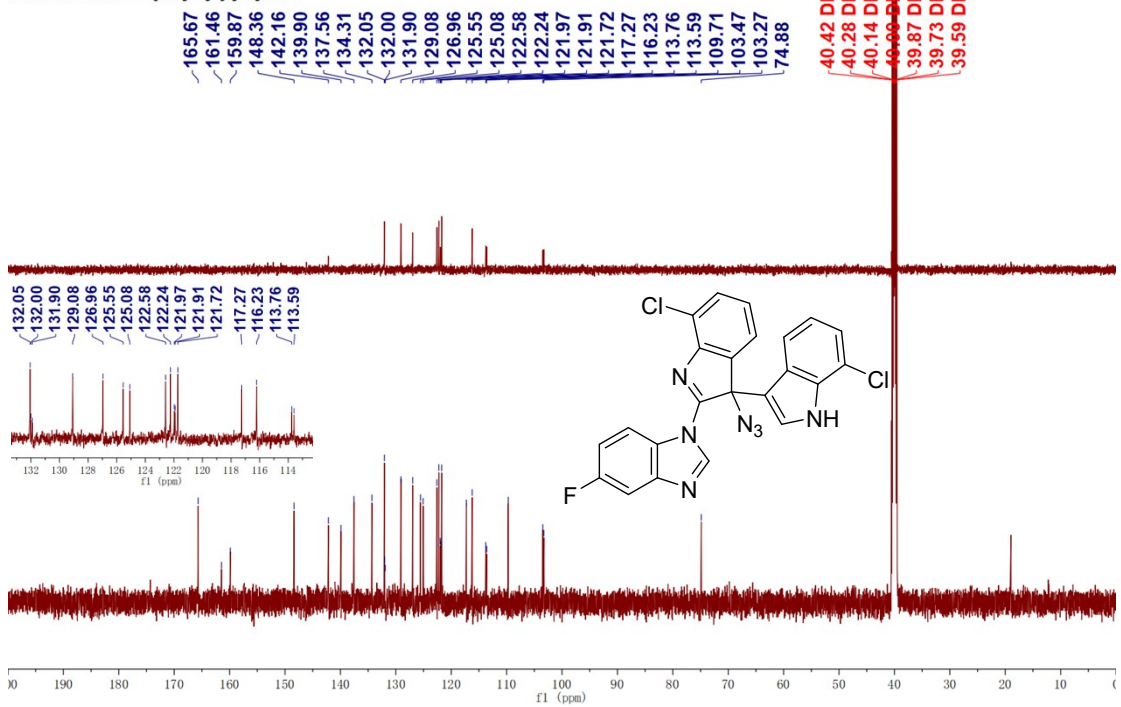

<sup>13</sup>C-NMR (151 MHz, DMSO) Spectra of compound **3n**

Jun28-2020-liuxiaoyu.14.fid  
YUNNAN UNIVERSITY ASCEND AVIIIHD600 LXY-20200623  
F19CPD DMSO {D:\jinyi} jinyi 22

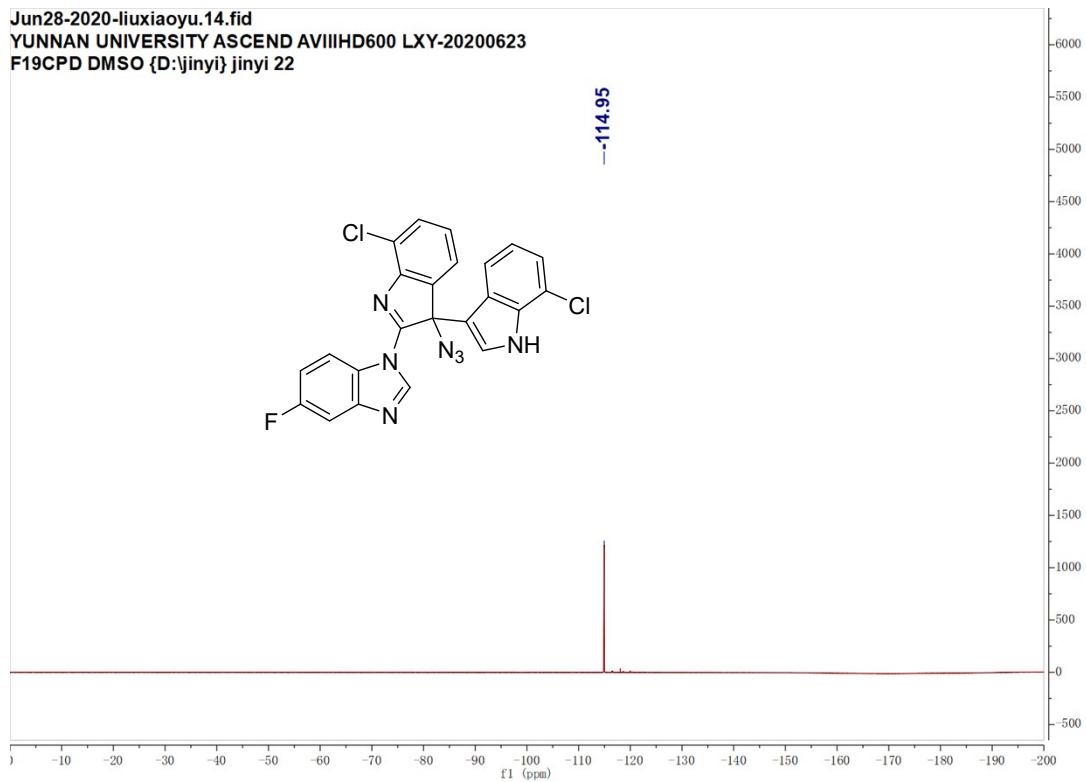

$^{19}\text{F}$ -NMR (565MHz, DMSO) spectrum of compound **3n**

Jun24-2020-liuxiaoyu.20.fid  
 YUNNAN UNIVERSITY ASCEND AVIIIHD600 LX-20200622B  
 Jun24-2020-liuxiaoyu  
 PROTON DMSO {D:jinyi} jinyi 22

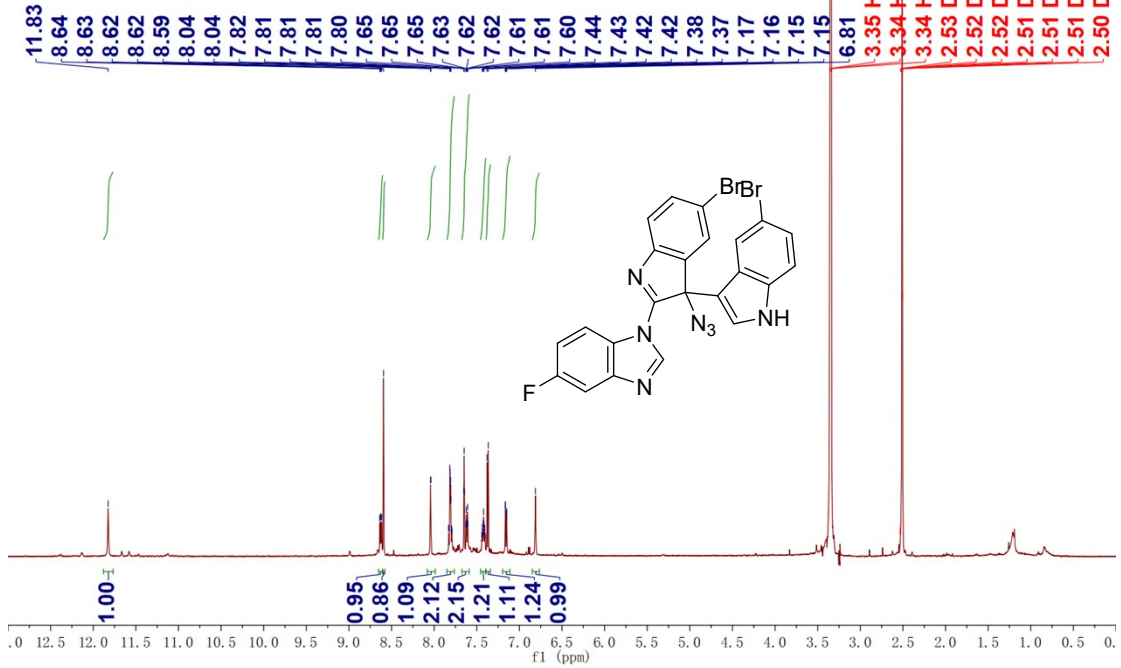

<sup>1</sup>H-NMR (600 MHz, DMSO) Spectra of compound **3o**

Oct12-2020-liuxiaoyu.31.fid  
 YUNNAN UNIVERSITY ASCEND AVIIIHD600 LX-20200622B-3  
 Oct12-2020-liuxiaoyu  
 C13CPD DMSO {D:jinyi} jinyi 14

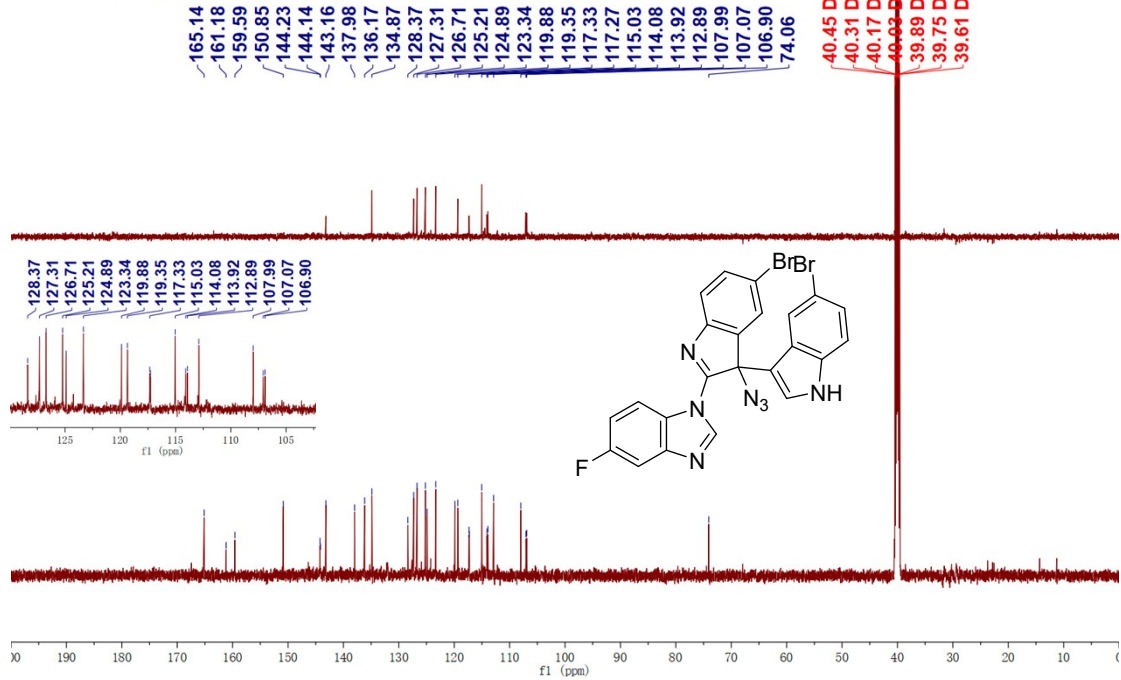

<sup>13</sup>C-NMR (151 MHz, DMSO) Spectra of compound **3o**

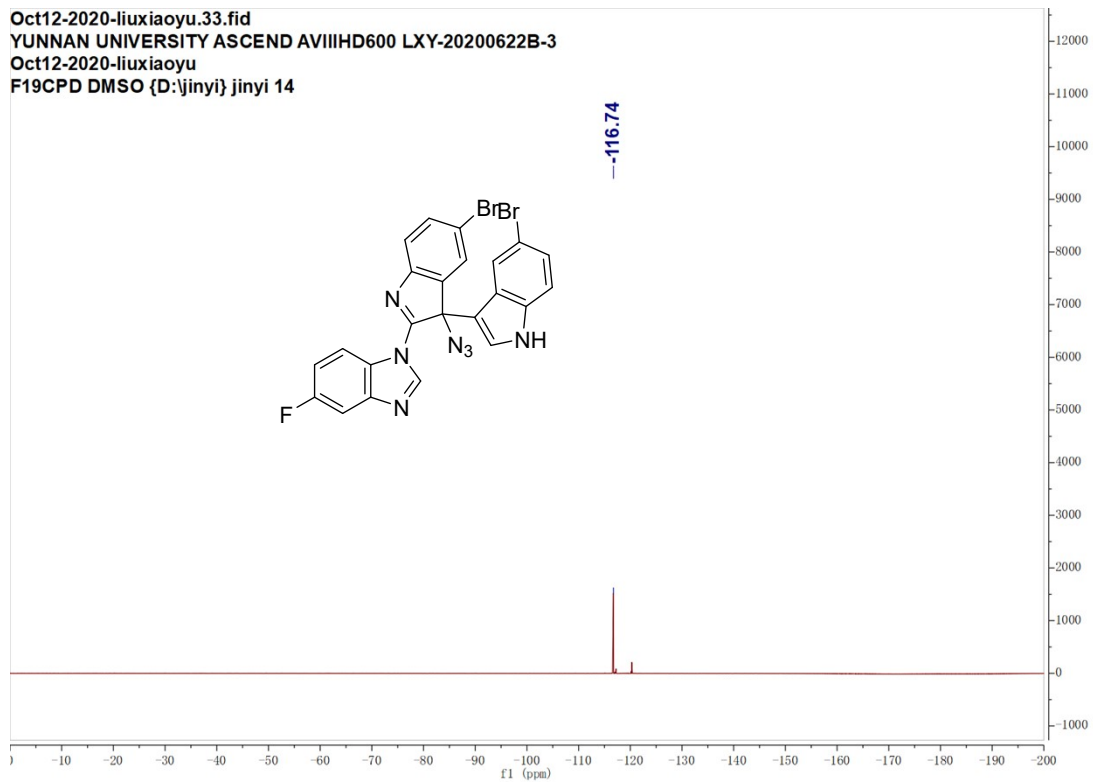

$^{19}\text{F}$ -NMR (565MHz, DMSO) spectrum of compound **3o**

Aug11-2021-liuxiaoyu.10.fid  
 YUNNAN UNIVERSITY ASCEND AVIIIHD600 LX Y20200629A-1  
 Aug11-2021-liuxiaoyu  
 PROTON DMSO {D:jinyi} jinyi 10

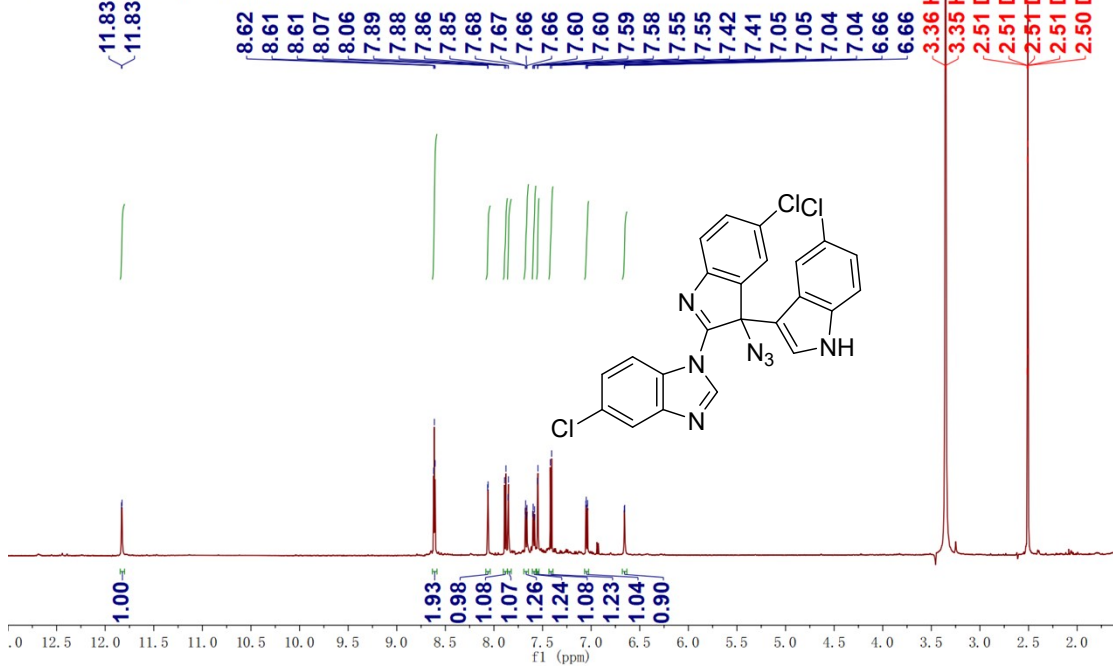

<sup>1</sup>H-NMR (600 MHz, DMSO) Spectra of compound 3p

Jun30-2020-liuxiaoyu.12.fid  
 YUNNAN UNIVERSITY ASCEND AVIIIHD600 LX Y20200629A  
 Jun30-2020-liuxiaoyu  
 C13CPD DMSO {D:jinyi} jinyi 10

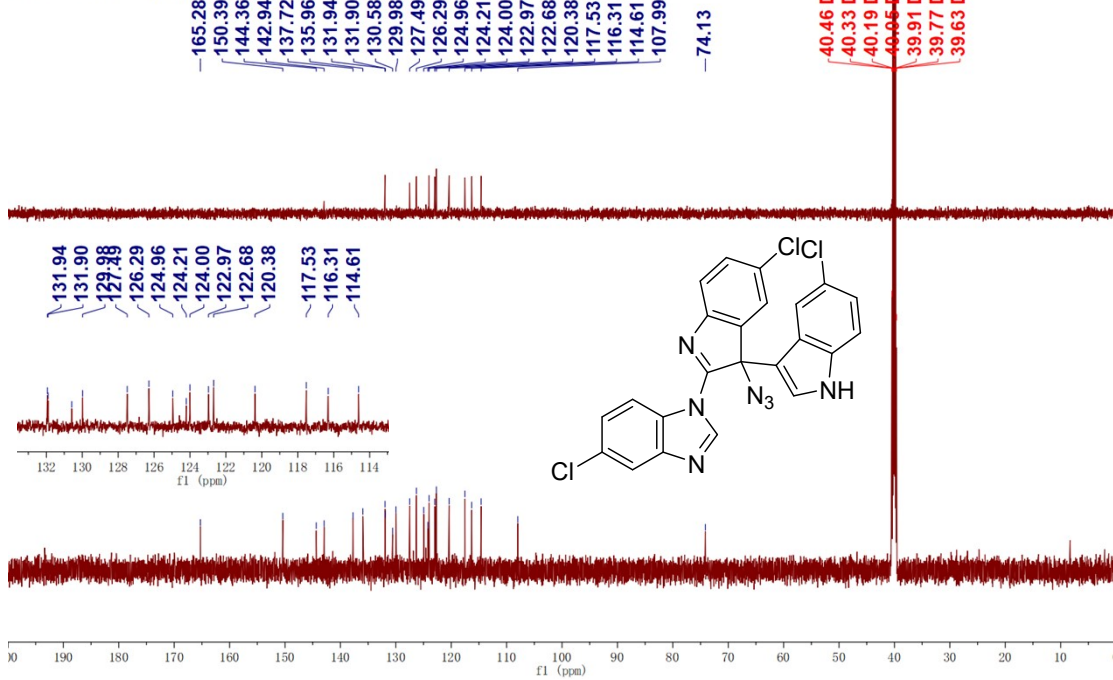

<sup>13</sup>C-NMR (151 MHz, DMSO) Spectra of compound 3p

Jun29-2020-liuxiaoyu.50.fid  
 YUNNAN UNIVERSITY ASCEND AVIIIHD600 LX Y20200628B  
 Jun29-2020-liuxiaoyu  
 PROTON DMSO {D:jinyi} jinyi 18

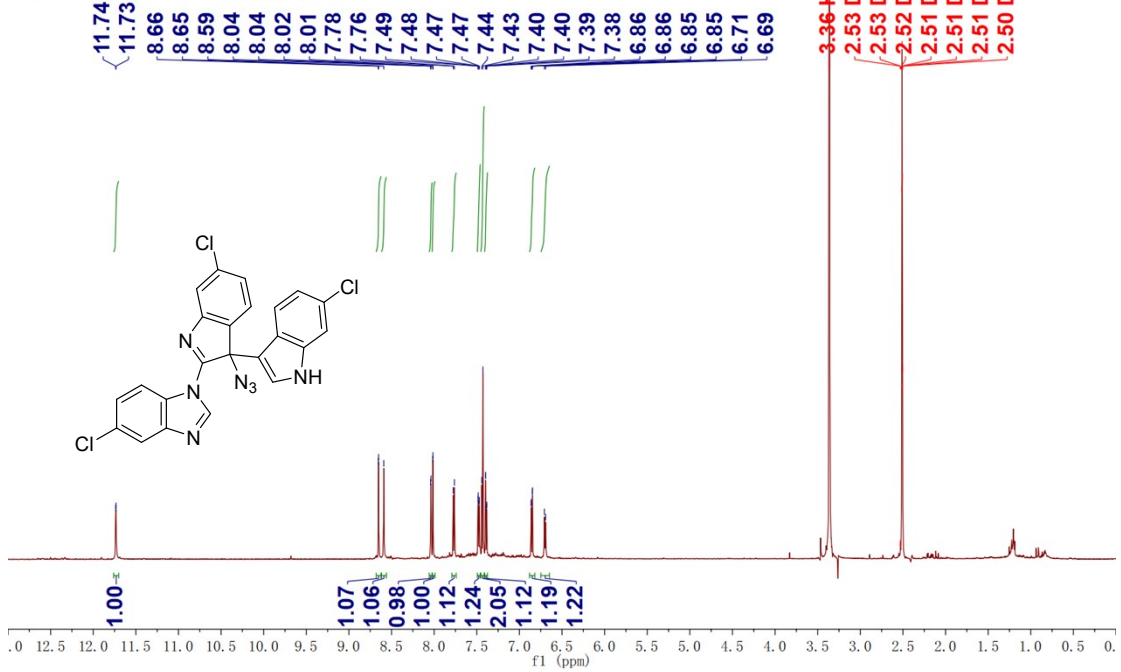

<sup>1</sup>H-NMR (600 MHz, DMSO) Spectra of compound **3q**

Jun30-2020-liuxiaoyu.32.fid  
 YUNNAN UNIVERSITY ASCEND AVIIIHD600 LX Y20200628B  
 Jun30-2020-liuxiaoyu  
 C13CPD DMSO {D:jinyi} jinyi 19

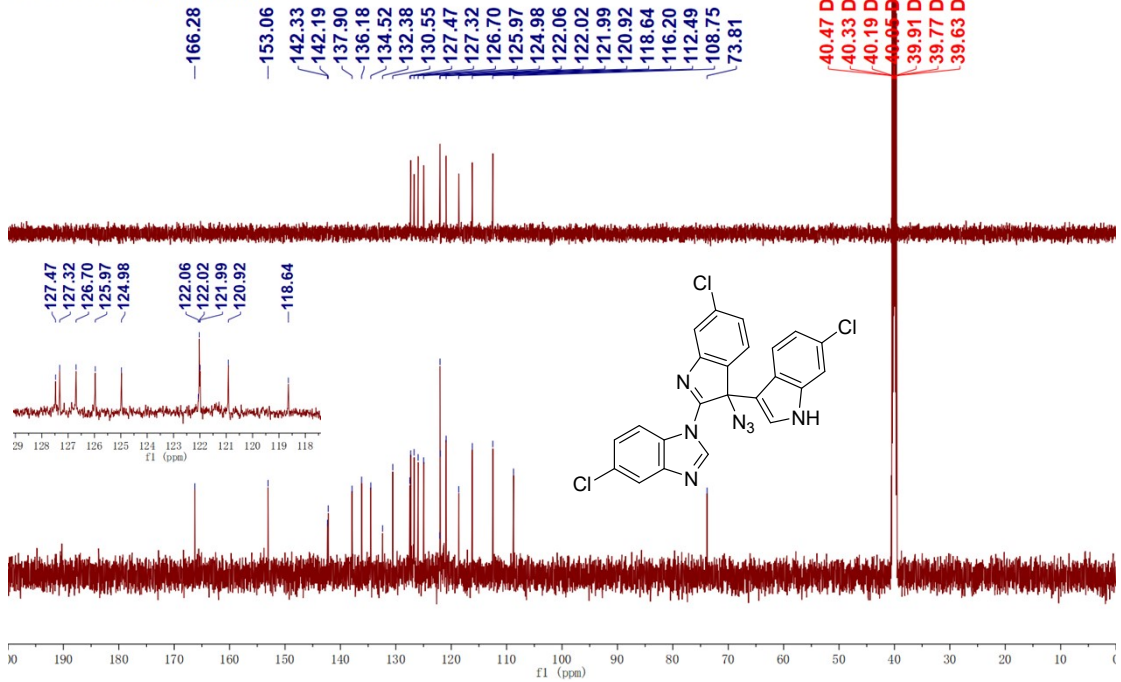

<sup>13</sup>C-NMR (151 MHz, DMSO) Spectra of compound **3q**

Aug12-2021-liuxiaoyu.10.fid  
 YUNNAN UNIVERSITY ASCEND AVIIIHD600 LX Y20210812  
 Aug12-2021-liuxiaoyu  
 PROTON DMSO {D:jinyi} jinyi 10

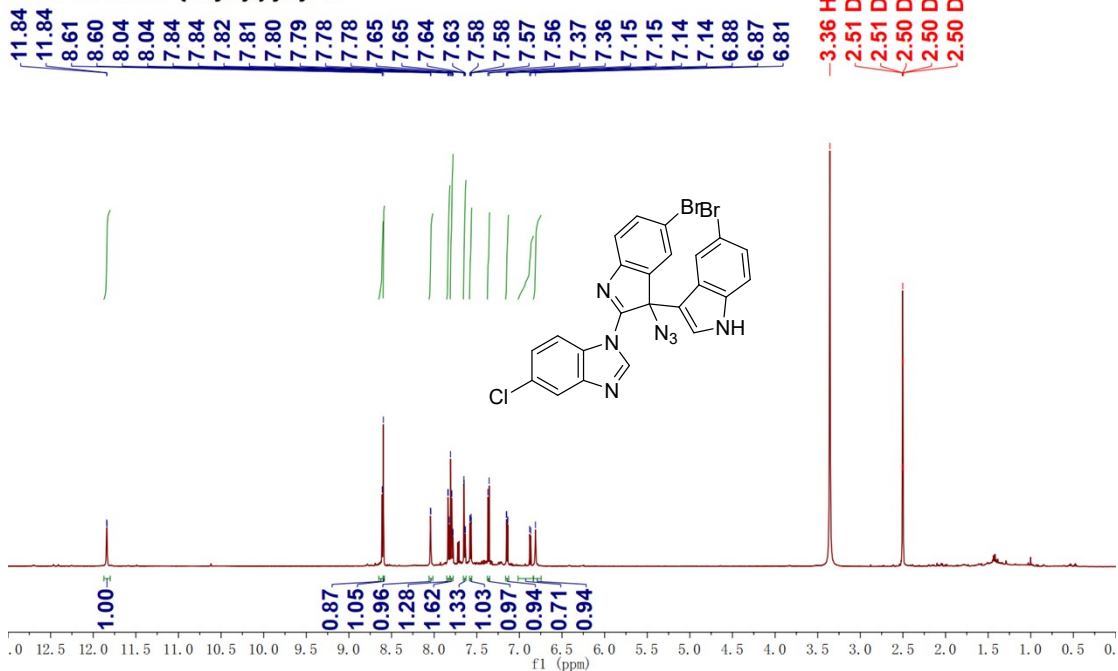

<sup>1</sup>H-NMR (600 MHz, DMSO) Spectra of compound **3r**

Jun30-2020-liuxiaoyu.22.fid  
 YUNNAN UNIVERSITY ASCEND AVIIIHD600 LX Y20200629B  
 Jun30-2020-liuxiaoyu  
 C13CPD DMSO {D:jinyi} jinyi 11

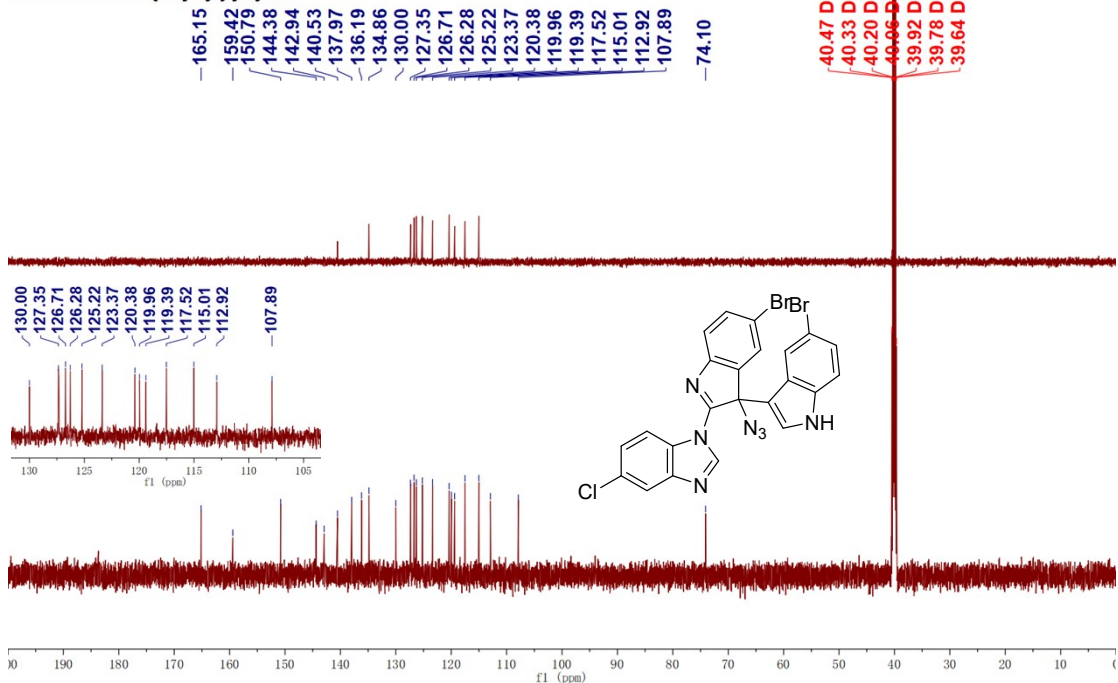

<sup>13</sup>C-NMR (151 MHz, DMSO) Spectra of compound **3r**



Aug13-2021-liuxiaoyu.10.fid  
YUNNAN UNIVERSITY ASCEND AVIIIHD600 LX Y20210813  
Aug13-2021-liuxiaoyu  
PROTON DMSO {D:jinyi} jinyi 23

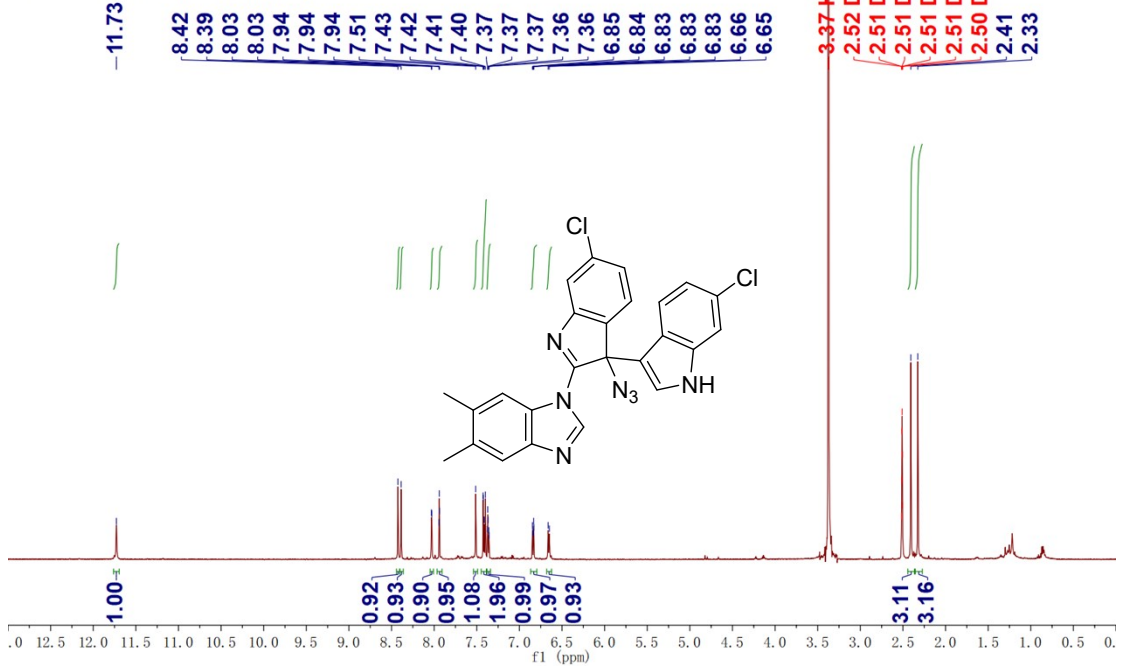

<sup>1</sup>H-NMR (600 MHz, DMSO) Spectra of compound 3s

Jul13-2020-liuxiaoyu.11.fid  
YUNNAN UNIVERSITY ASCEND AVIIIHD600 LX Y-20200710  
C13CPD DMSO {D:jinyi} jinyi 18

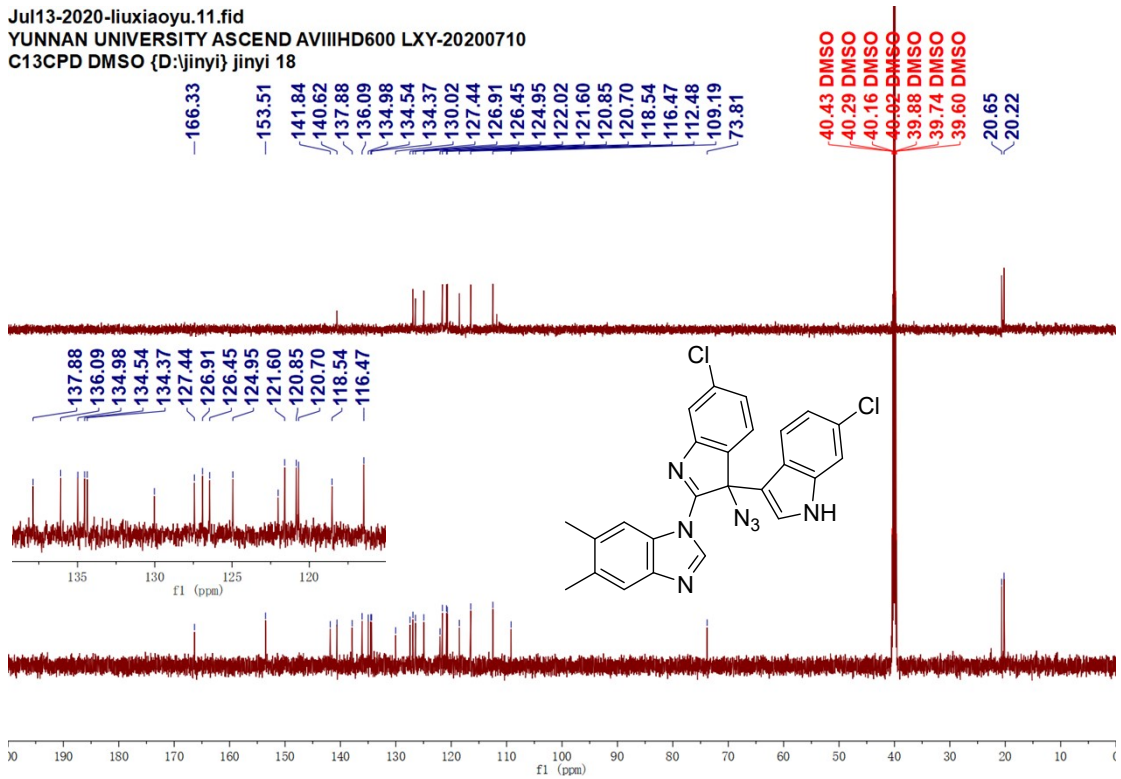

<sup>13</sup>C-NMR (151 MHz, DMSO) Spectra of compound 3s

Aug19-2020-liuxiaoyu.21.fid  
 YUNNAN UNIVERSITY ASCEND AVIIIHD600 LX20200817D  
 Aug19-2020-liuxiaoyu  
 PROTON Acetone {D:\jinyi} jinyi 22

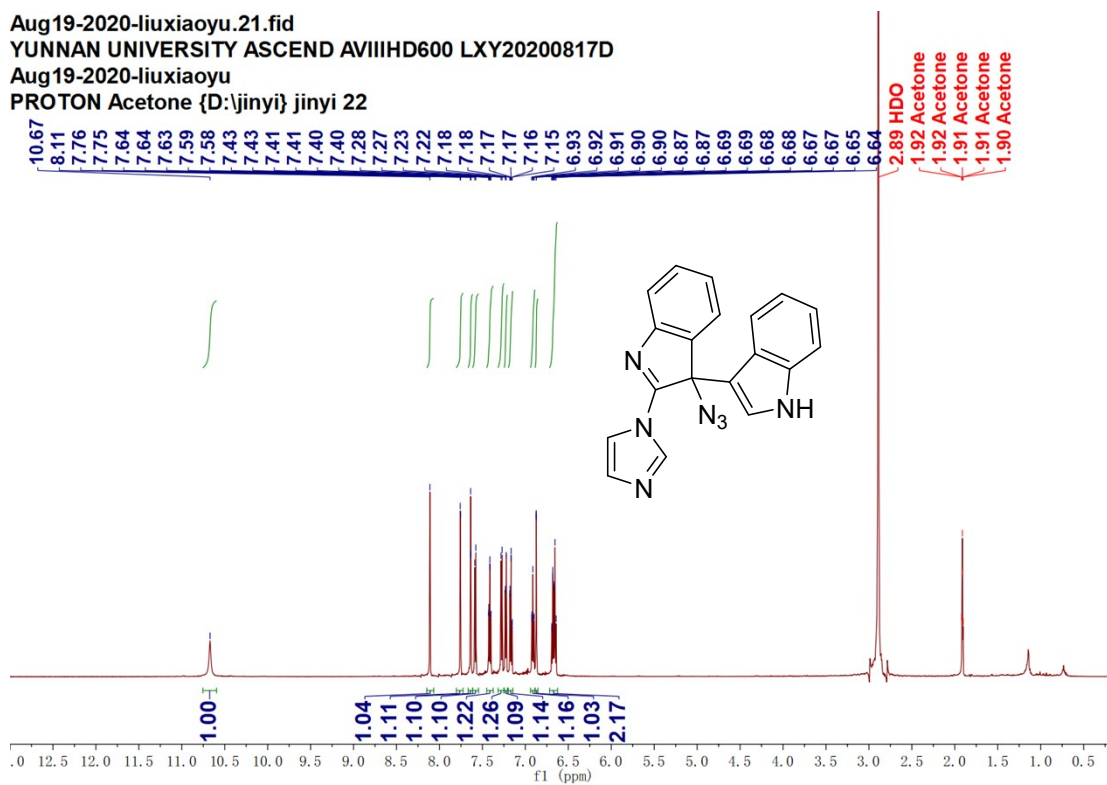

<sup>1</sup>H-NMR (600 MHz, DMSO) Spectra of compound **4a**

Aug19-2020-liuxiaoyu.22.fid  
 YUNNAN UNIVERSITY ASCEND AVIIIHD600 LX20200817D  
 Aug19-2020-liuxiaoyu  
 C13CPD Acetone {D:\jinyi} jinyi 22

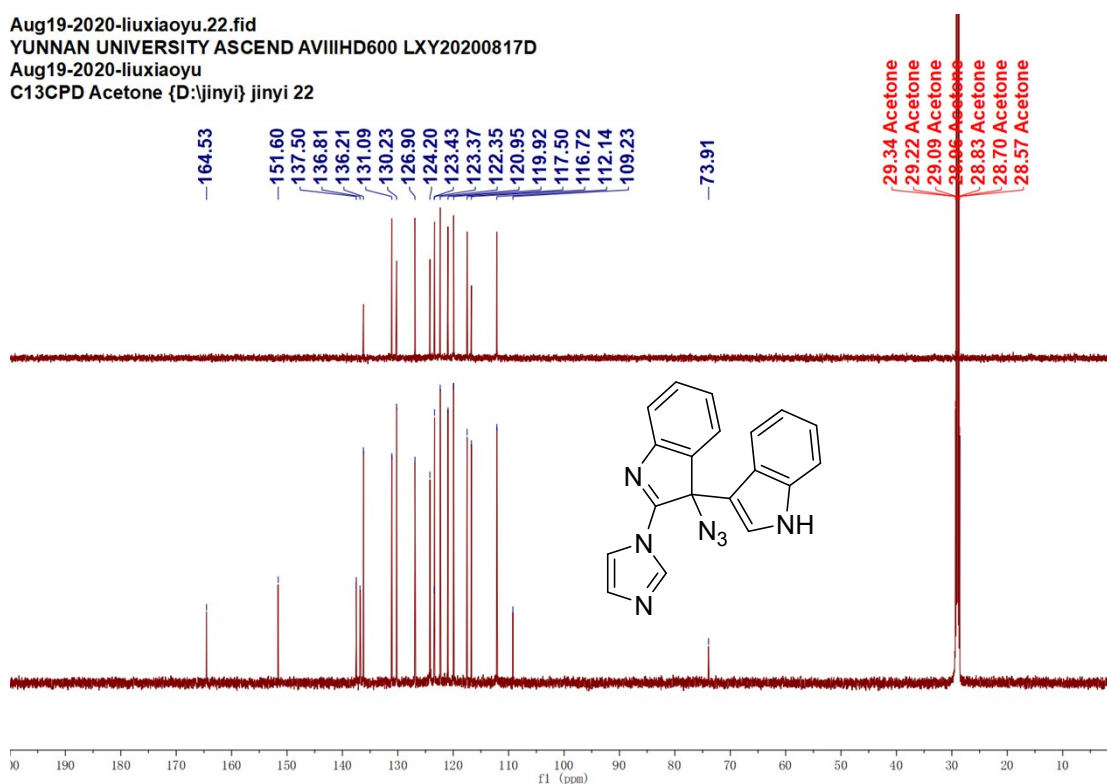

<sup>13</sup>C-NMR (151 MHz, DMSO) Spectra of compound **4a**

Aug27-2020-liuxiaoyu.40.fid  
 YUNNAN UNIVERSITY ASCEND AVIIIHD600 LX-20200819A  
 PROTON DMSO {D:l:jinyi} jinyi 3

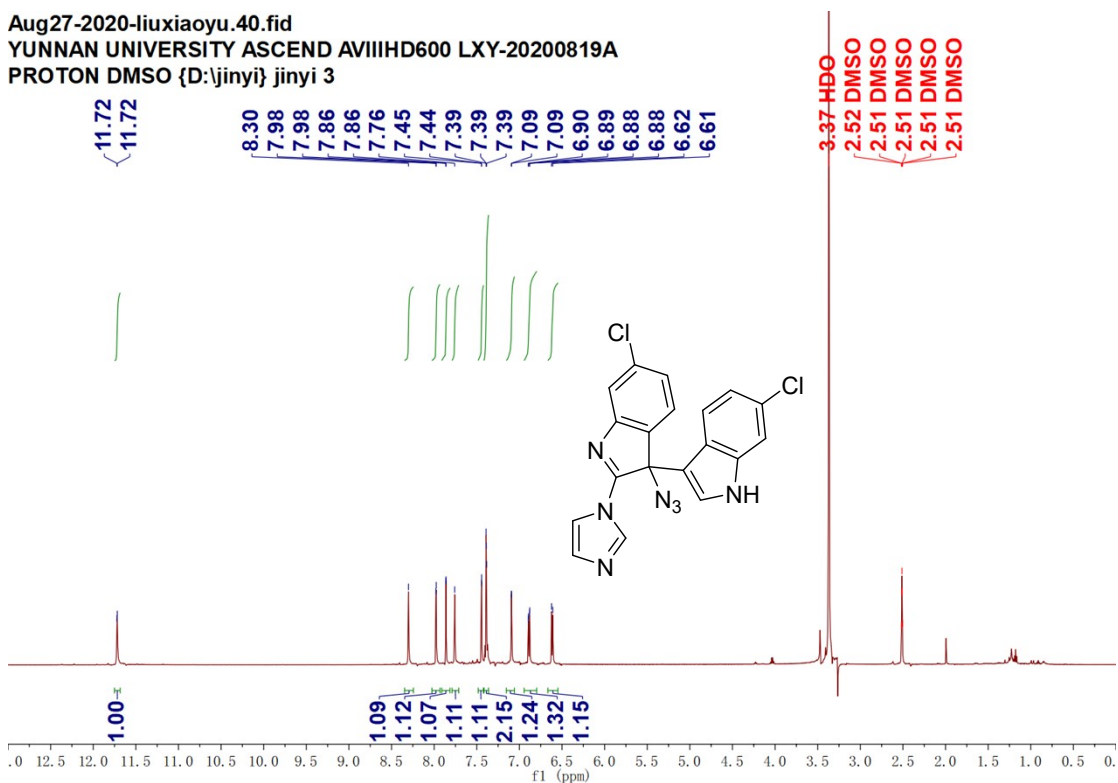

<sup>1</sup>H-NMR (600 MHz, DMSO) Spectra of compound **4b**

Aug27-2020-liuxiaoyu.41.fid  
 YUNNAN UNIVERSITY ASCEND AVIIIHD600 LX-20200819A  
 C13CPD DMSO {D:l:jinyi} jinyi 3

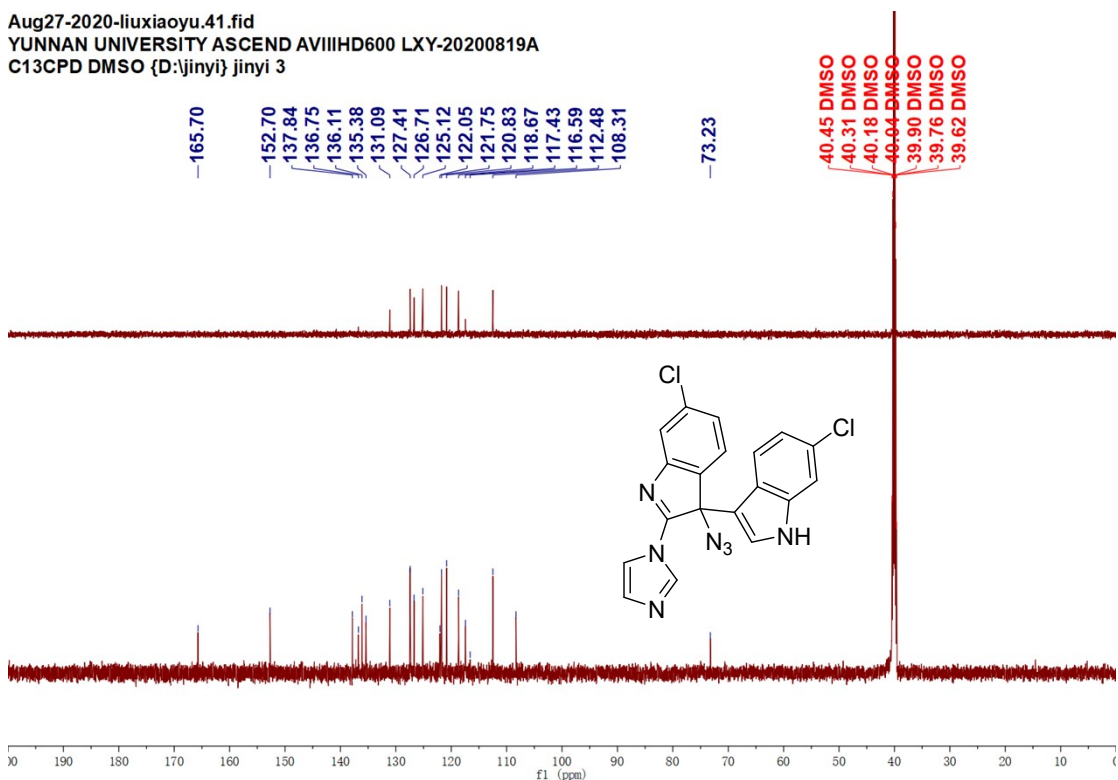

<sup>13</sup>C-NMR (151 MHz, DMSO) Spectra of compound **4b**

Sep23-2020-liuxiaoyu.20.fid  
YUNNAN UNIVERSITY ASCEND AVIIIHD600 LX Y20200910-2  
Sep23-2020-liuxiaoyu  
PROTON DMSO {D:jinyi} jinyi 12

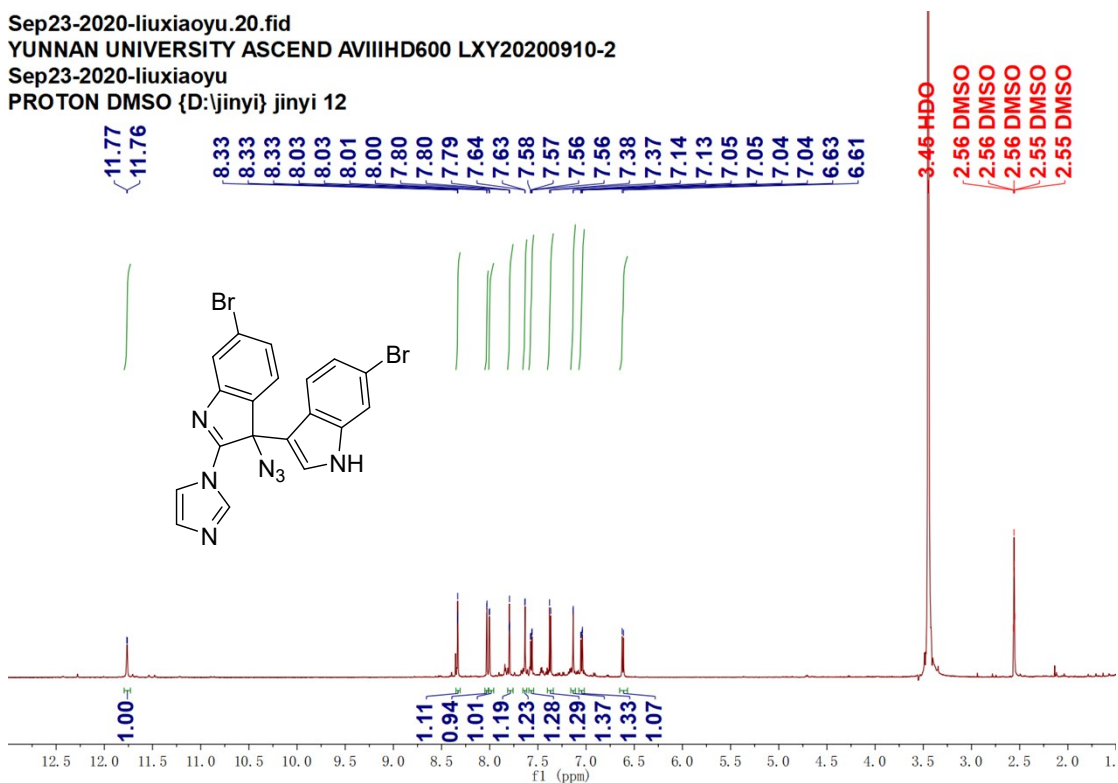

<sup>1</sup>H-NMR (600 MHz, DMSO) Spectra of compound **4c**

Sep23-2020-liuxiaoyu.21.fid  
YUNNAN UNIVERSITY ASCEND AVIIIHD600 LX Y20200910-2  
Sep23-2020-liuxiaoyu  
C13CPD DMSO {D:jinyi} jinyi 12

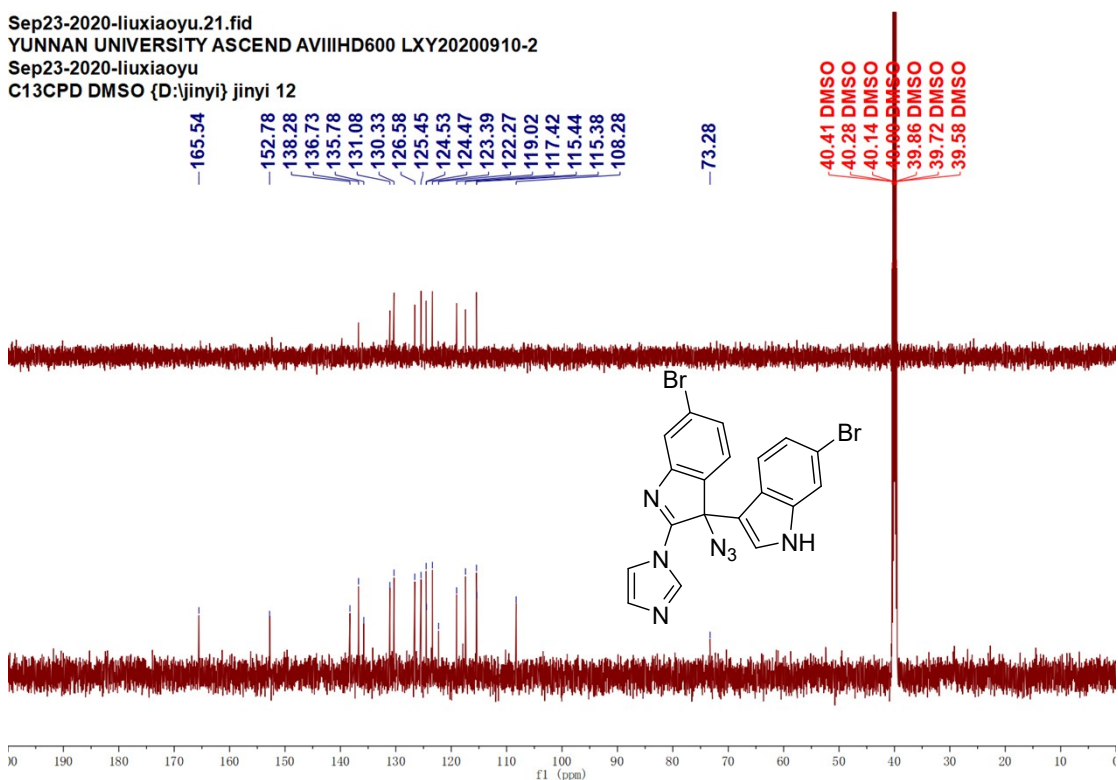

<sup>13</sup>C-NMR (151 MHz, DMSO) Spectra of compound **4c**

Aug27-2020-liuxiaoyu.20.fid  
 YUNNAN UNIVERSITY ASCEND AVIIIHD600 LX-20200823B  
 Aug27-2020-liuxiaoyu  
 PROTON DMSO {D:jinyi} jinyi 21

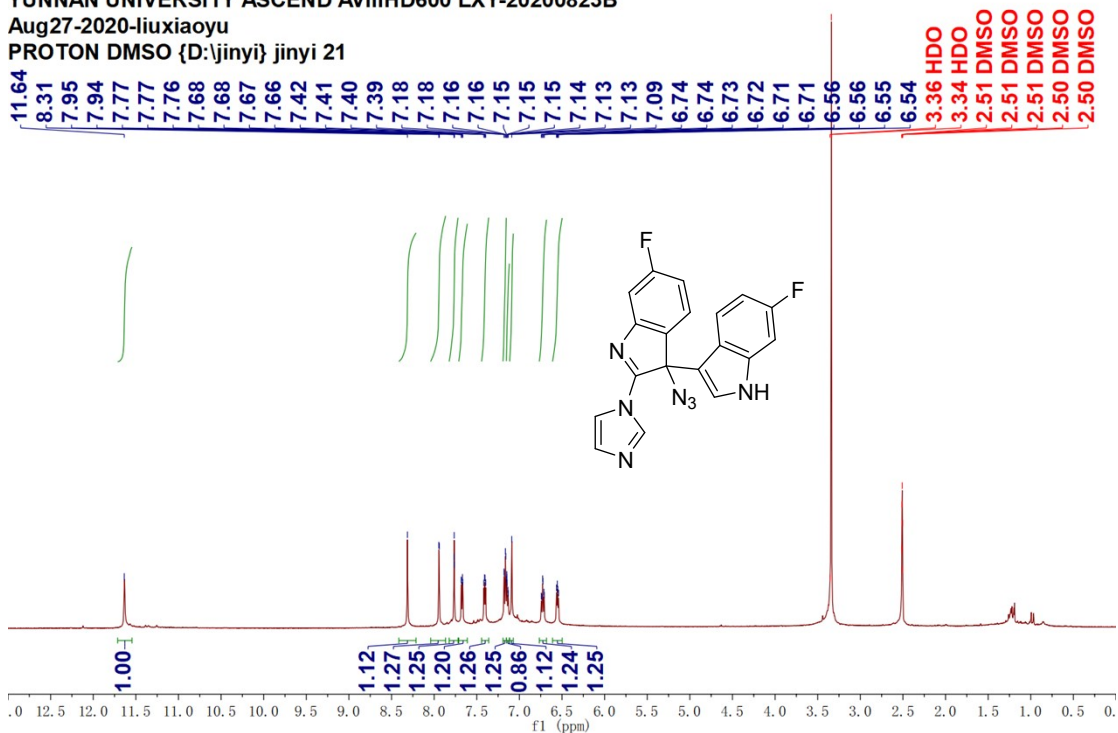

<sup>1</sup>H-NMR (600 MHz, DMSO) Spectra of compound 4d

Aug27-2020-liuxiaoyu.21.fid  
 YUNNAN UNIVERSITY ASCEND AVIIIHD600 LX-20200823B  
 Aug27-2020-liuxiaoyu  
 C13CPD DMSO {D:jinyi} jinyi 21

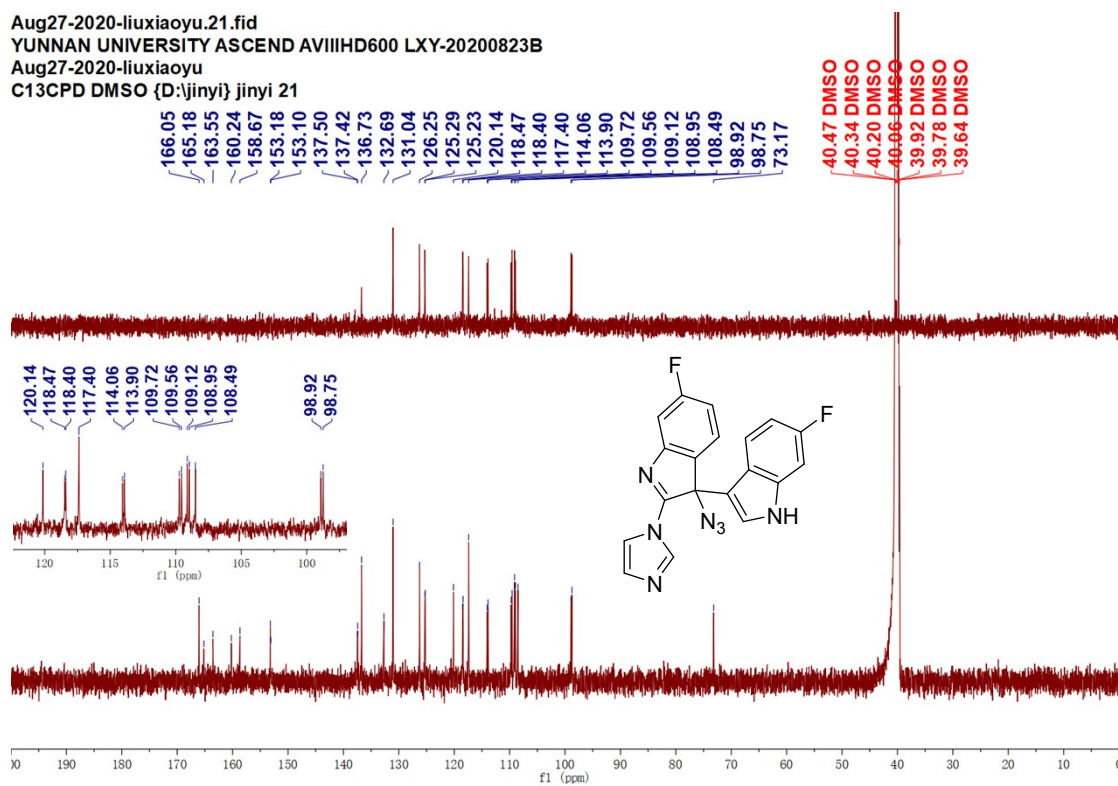

<sup>13</sup>C-NMR (151 MHz, DMSO) Spectra of compound 4d

Aug27-2020-liuxiaoyu.23.fid  
YUNNAN UNIVERSITY ASCEND AVIIIHD600 LXY-20200823B  
Aug27-2020-liuxiaoyu  
F19CPD DMSO {D:\jinyi} jinyi 21

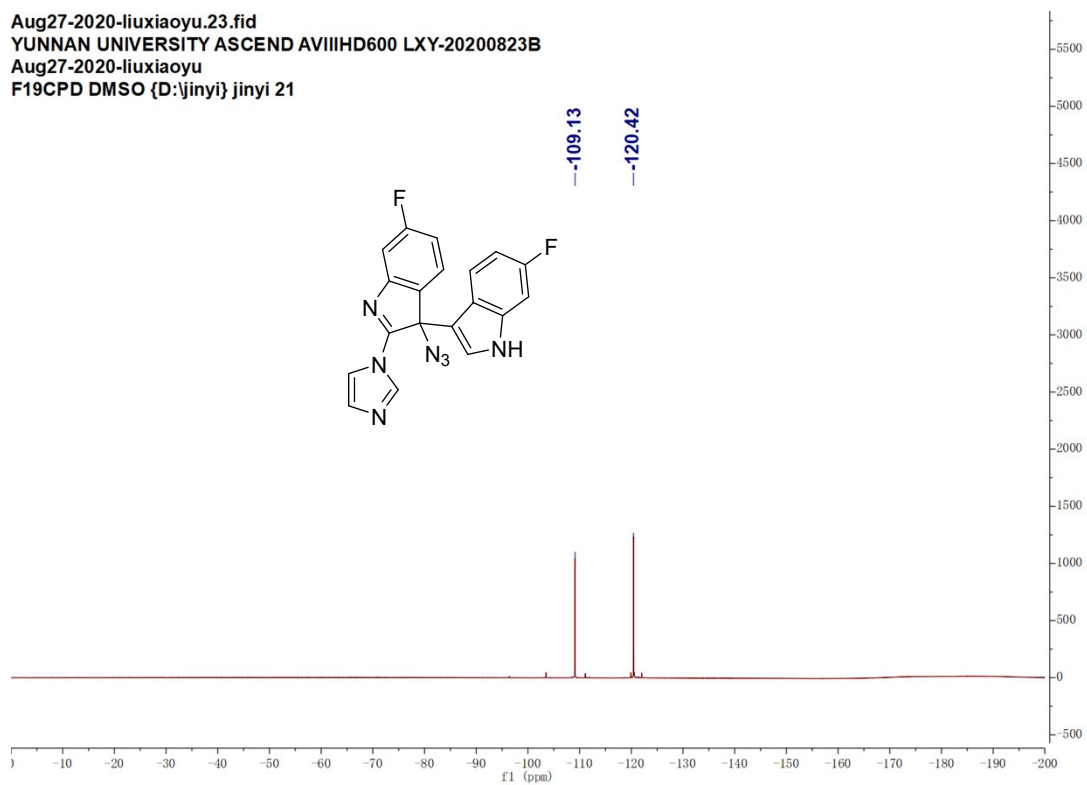

<sup>19</sup>F-NMR (565MHz, DMSO) spectrum of compound **4d**

Aug25-2020-liuxiaoyu.40.fid  
 YUNNAN UNIVERSITY ASCEND AVIIIHD600 LXY20200823A-2  
 Aug25-2020-liuxiaoyu  
 PROTON DMSO {D:jinyi} jinyi 8

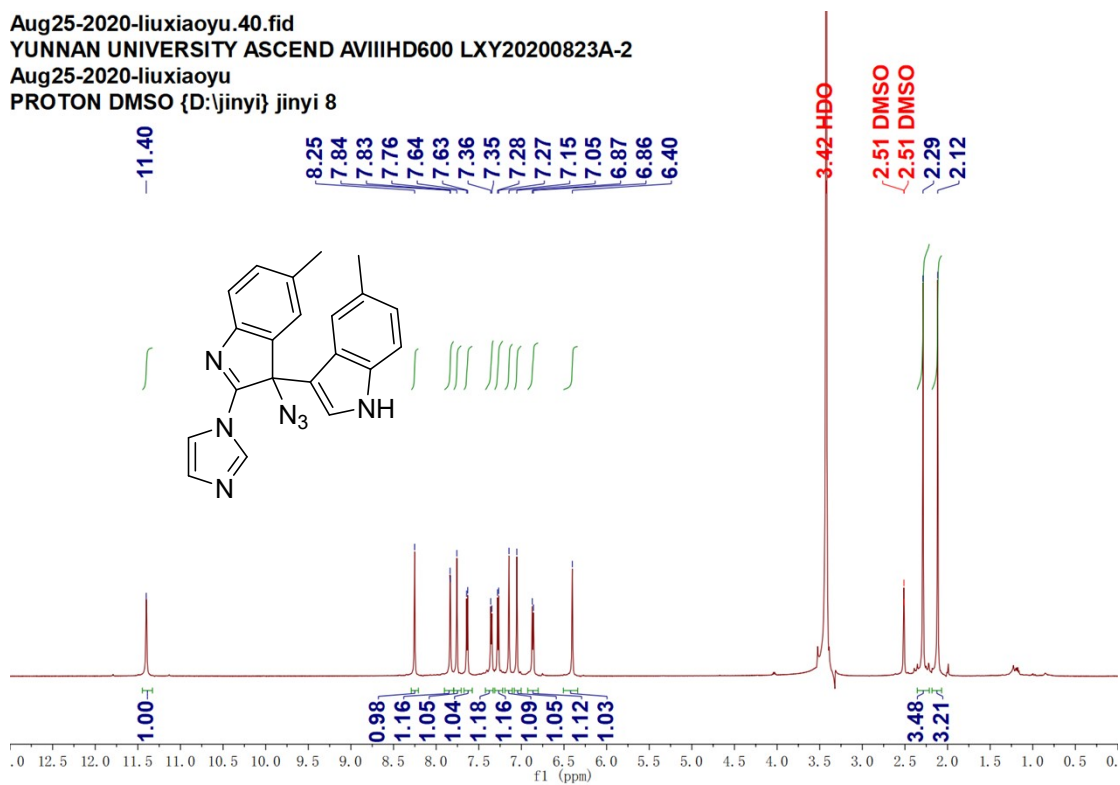

Aug25-2020-liuxiaoyu.131.fid  
 YUNNAN UNIVERSITY ASCEND AVIIIHD600 LXY-20200823A  
 Aug25-2020-liuxiaoyu  
 C13CPD DMSO {D:jinyi} jinyi 24

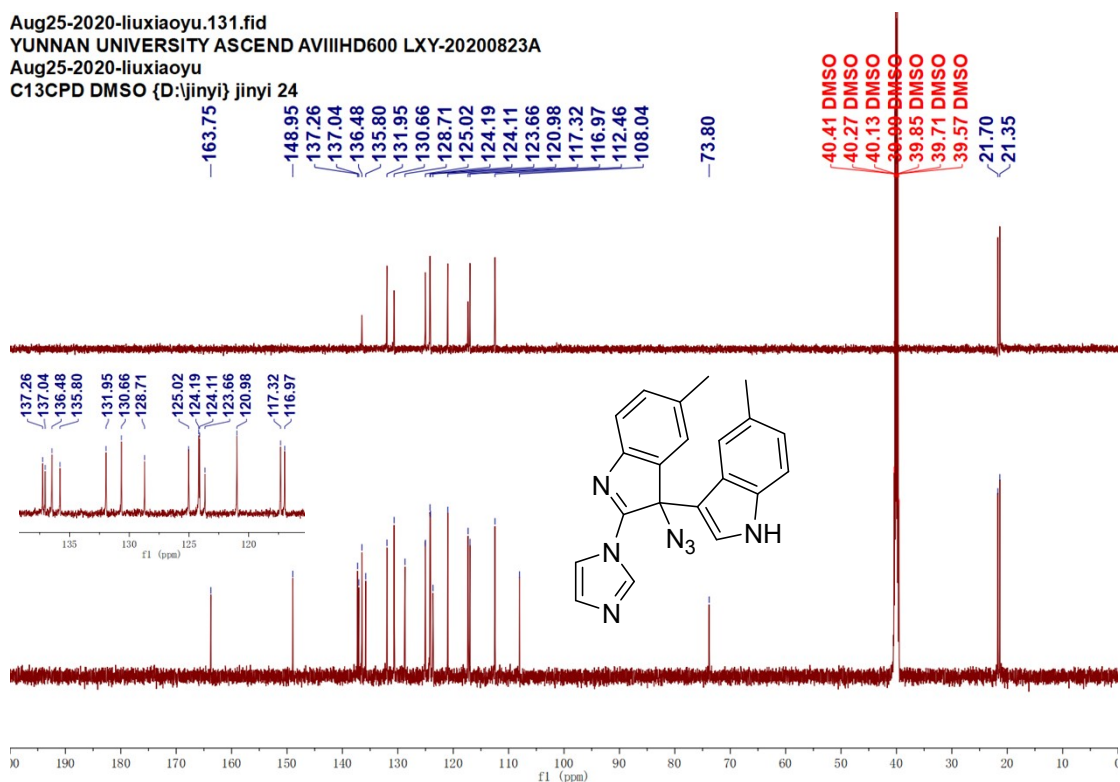

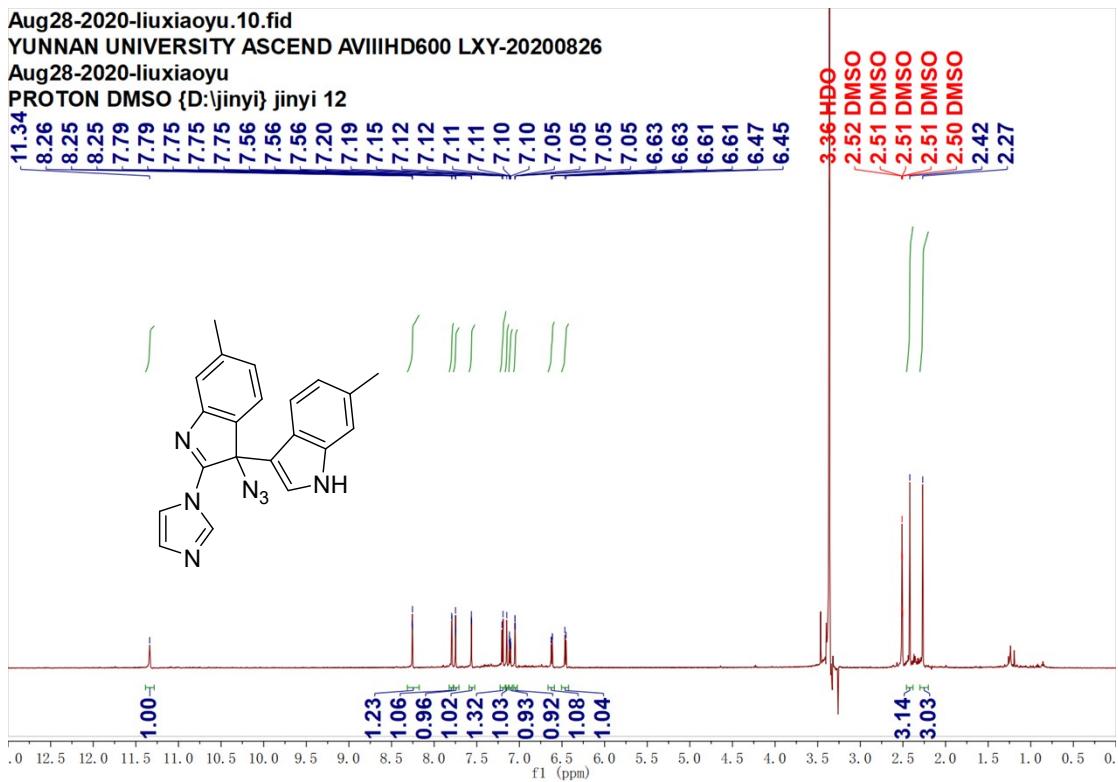

<sup>1</sup>H-NMR (600 MHz, DMSO) Spectra of compound 4f

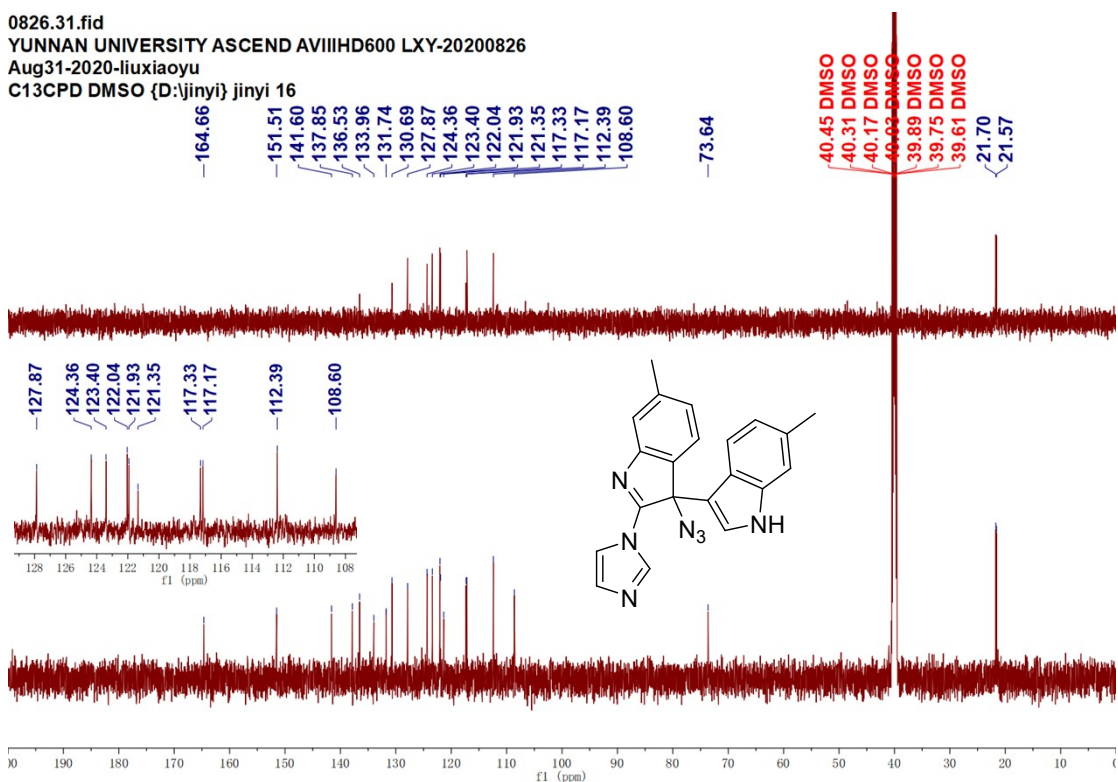

<sup>13</sup>C-NMR (151 MHz, DMSO) Spectra of compound 4f



Aug26-2020-liuxiaoyu.10.fid  
 YUNNAN UNIVERSITY ASCEND AVIIIHD600 LX Y-20200820A  
 Aug26-2020-liuxiaoyu  
 PROTON DMSO {D:jinyi} jinyi 18

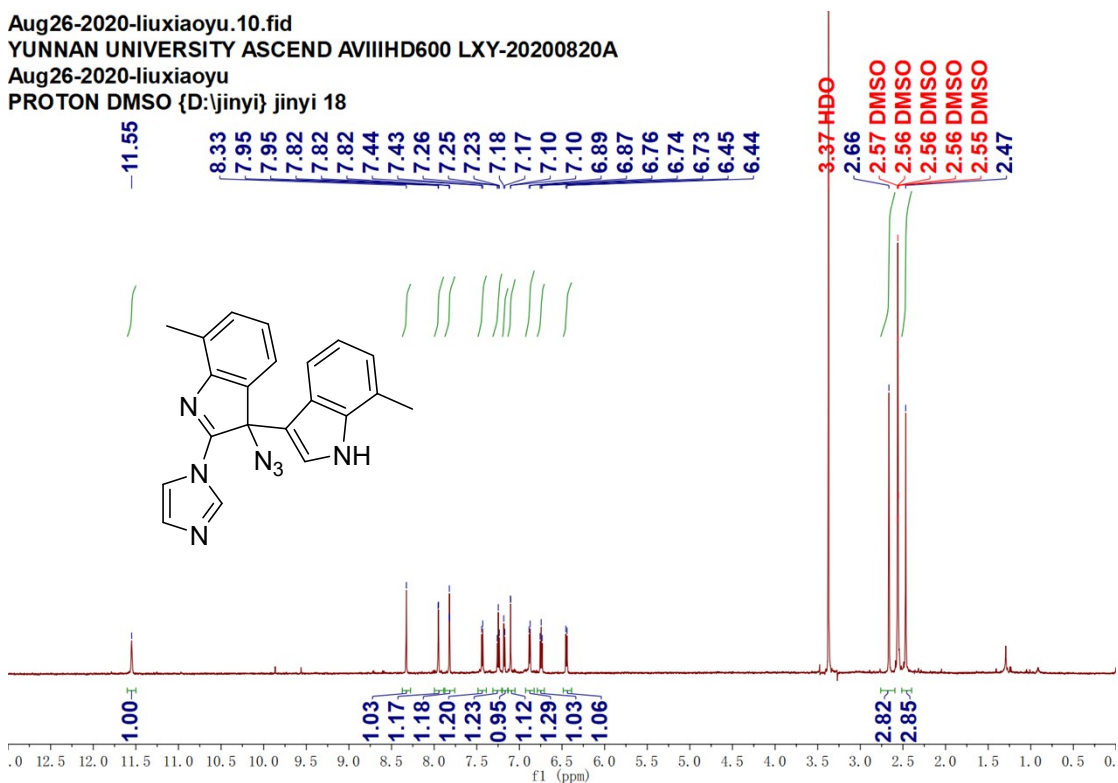

Aug24-2020-liuxiaoyu.31.fid  
 YUNNAN UNIVERSITY ASCEND AVIIIHD600 LX Y20200820A  
 Aug24-2020-liuxiaoyu  
 C13CPD DMSO {D:jinyi} jinyi 1

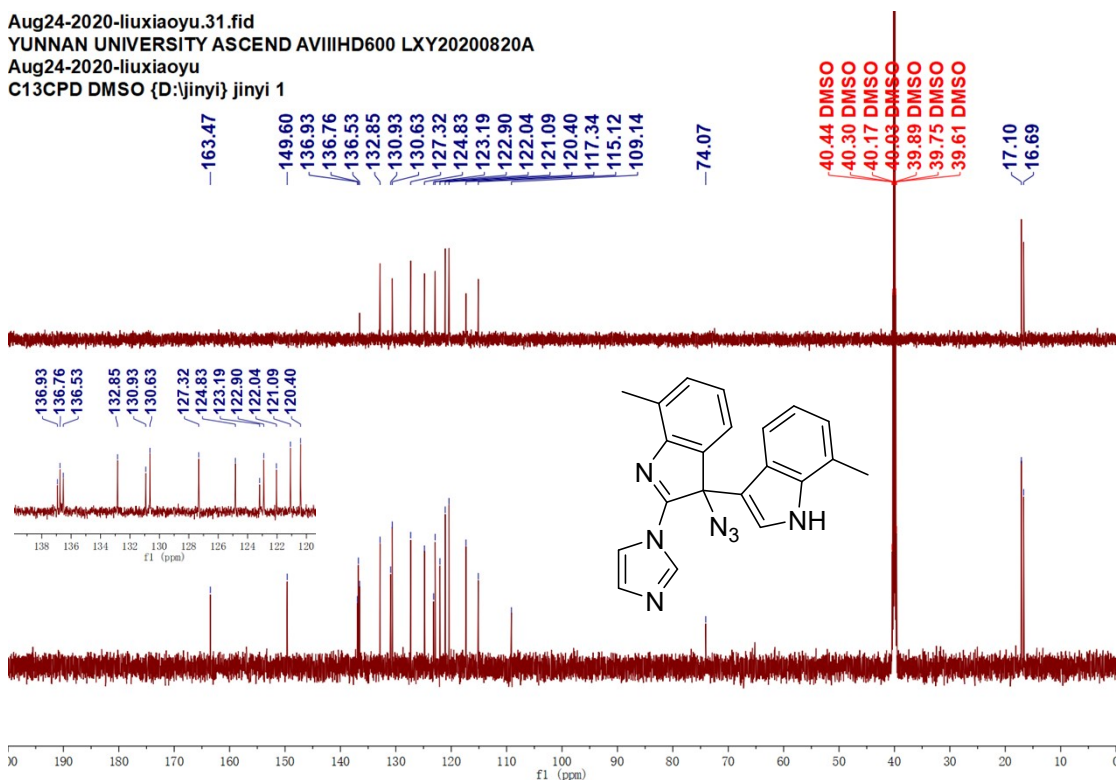

Aug21-2020-liuxiaoyu.30.fid  
 YUNNAN UNIVERSITY ASCEND AVIIIHD600 LX Y20200819B  
 Aug21-2020-liuxiaoyu  
 PROTON DMSO {D:jinyi} jinyi 21

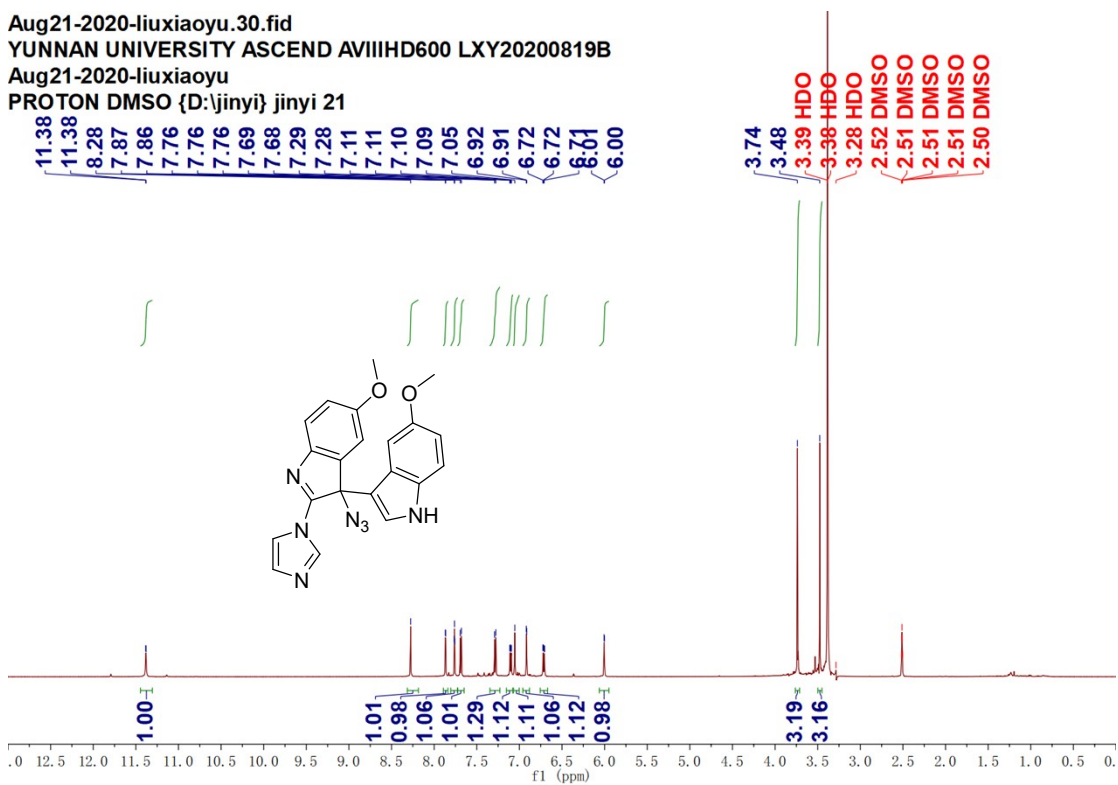

<sup>1</sup>H-NMR (600 MHz, DMSO) Spectra of compound **4h**

Aug21-2020-liuxiaoyu.31.fid  
 YUNNAN UNIVERSITY ASCEND AVIIIHD600 LX Y20200819B  
 Aug21-2020-liuxiaoyu  
 C13CPD DMSO {D:jinyi} jinyi 21

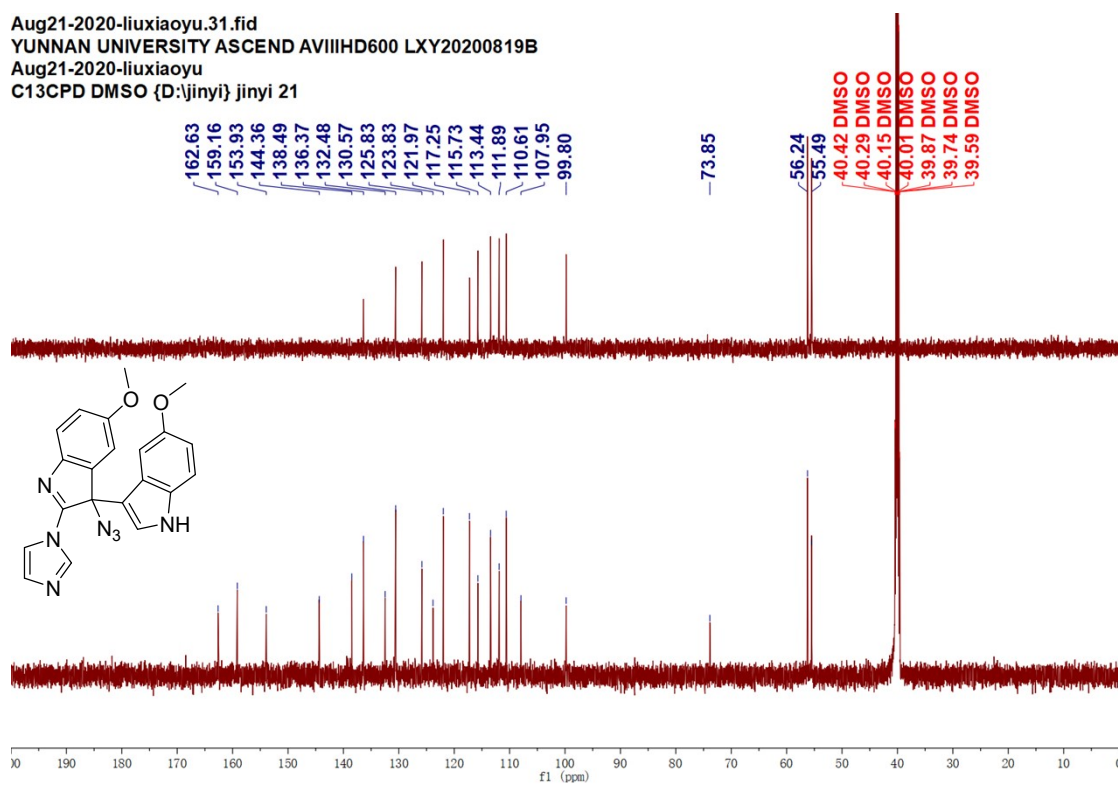

<sup>13</sup>C-NMR (151 MHz, DMSO) Spectra of compound **4h**

Aug31-2020-liuxiaoyu.70.fid  
 YUNNAN UNIVERSITY ASCEND AVIIIHD600 LX Y20200827A  
 Aug31-2020-liuxiaoyu  
 PROTON DMSO {D:jinyi} jinyi 21

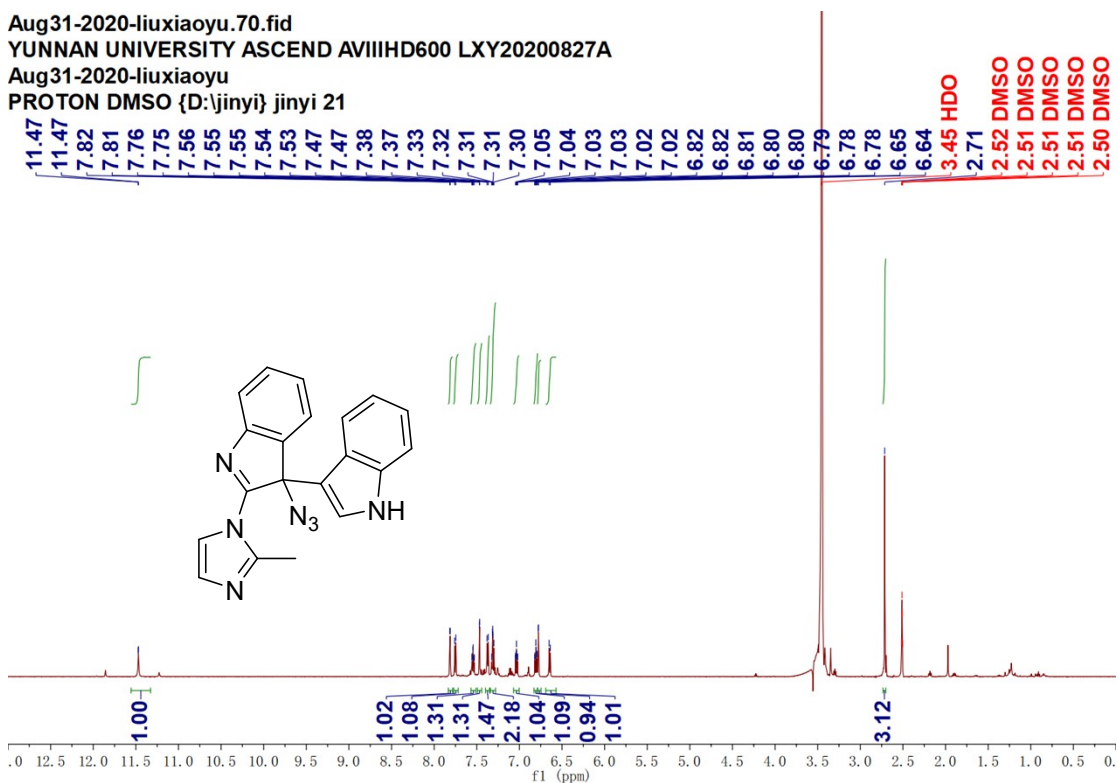

<sup>1</sup>H-NMR (600 MHz, DMSO) Spectra of compound **4i**

Aug31-2020-liuxiaoyu.71.fid  
 YUNNAN UNIVERSITY ASCEND AVIIIHD600 LX Y20200827A  
 Aug31-2020-liuxiaoyu  
 C13CPD DMSO {D:jinyi} jinyi 21

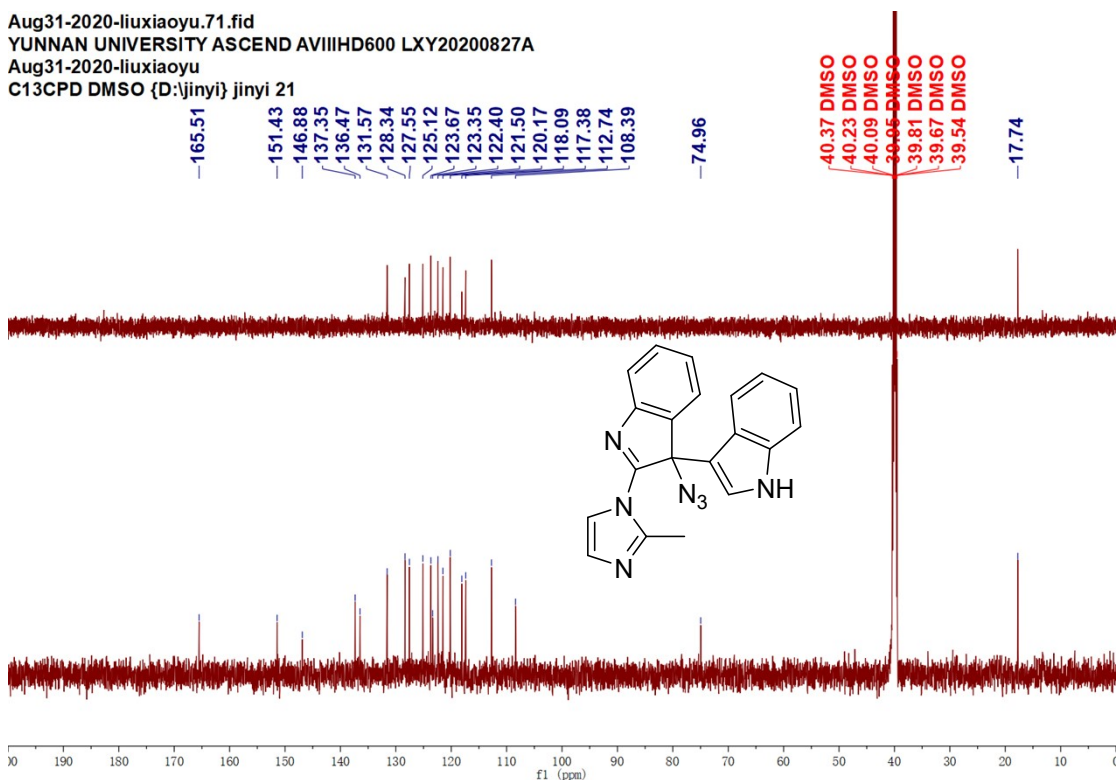

<sup>13</sup>C-NMR (151 MHz, DMSO) Spectra of compound **4i**

Aug31-2020-liuxiaoyu.80.fid  
 YUNNAN UNIVERSITY ASCEND AVIIIHD600 LX Y20200827B  
 Aug31-2020-liuxiaoyu  
 PROTON DMSO {D:jinyi} jinyi 23

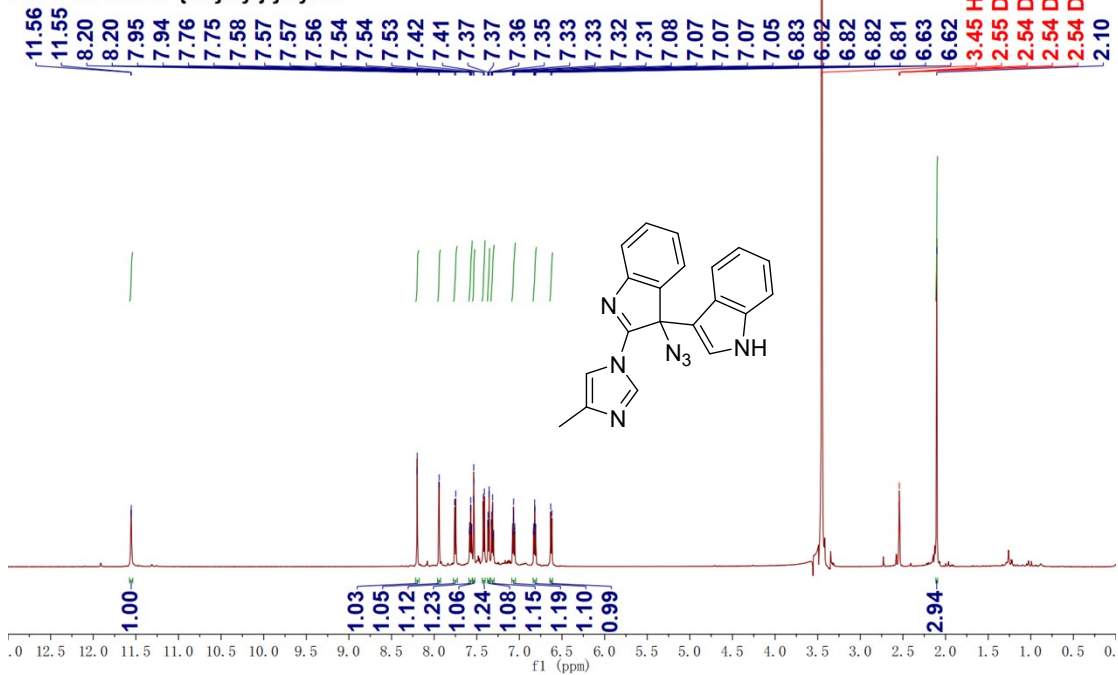

<sup>1</sup>H-NMR (600 MHz, DMSO) Spectra of compound 4j

Aug31-2020-liuxiaoyu.81.fid  
 YUNNAN UNIVERSITY ASCEND AVIIIHD600 LX Y20200827B  
 Aug31-2020-liuxiaoyu  
 C13CPD DMSO {D:jinyi} jinyi 23

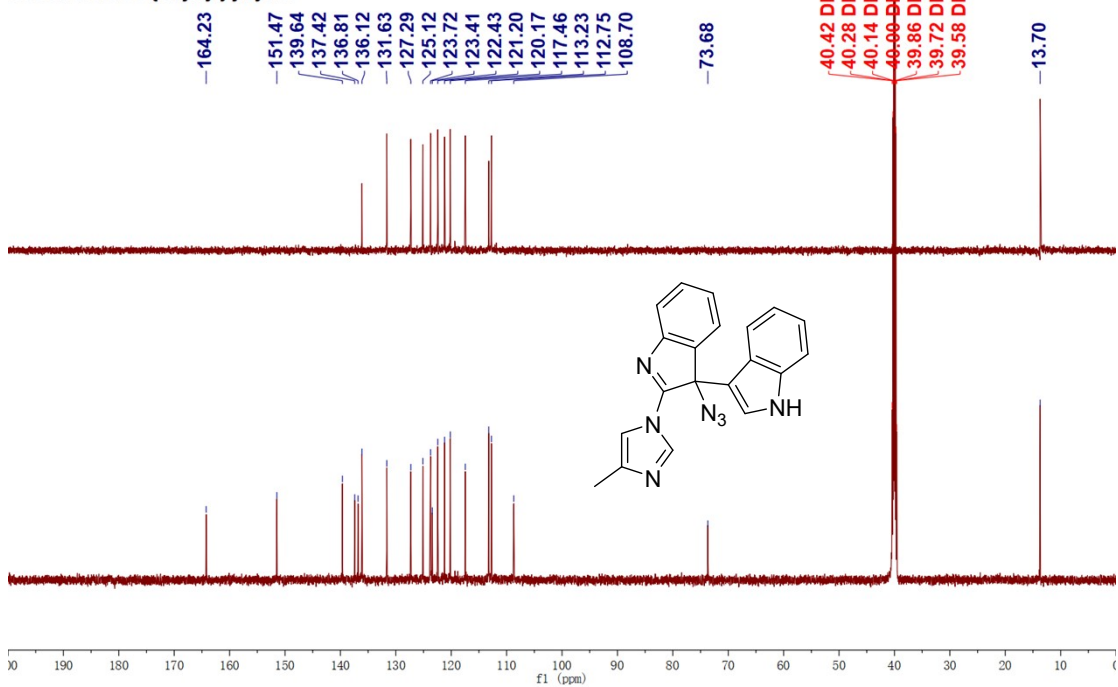

<sup>13</sup>C-NMR (151 MHz, DMSO) Spectra of compound 4j

Sep22-2020-liuxiaoyu.21.fid  
 YUNNAN UNIVERSITY ASCEND AVIIIHD600 LX Y20200906A-4  
 Sep22-2020-liuxiaoyu  
 PROTON DMSO {D:jinyi} jinyi 12

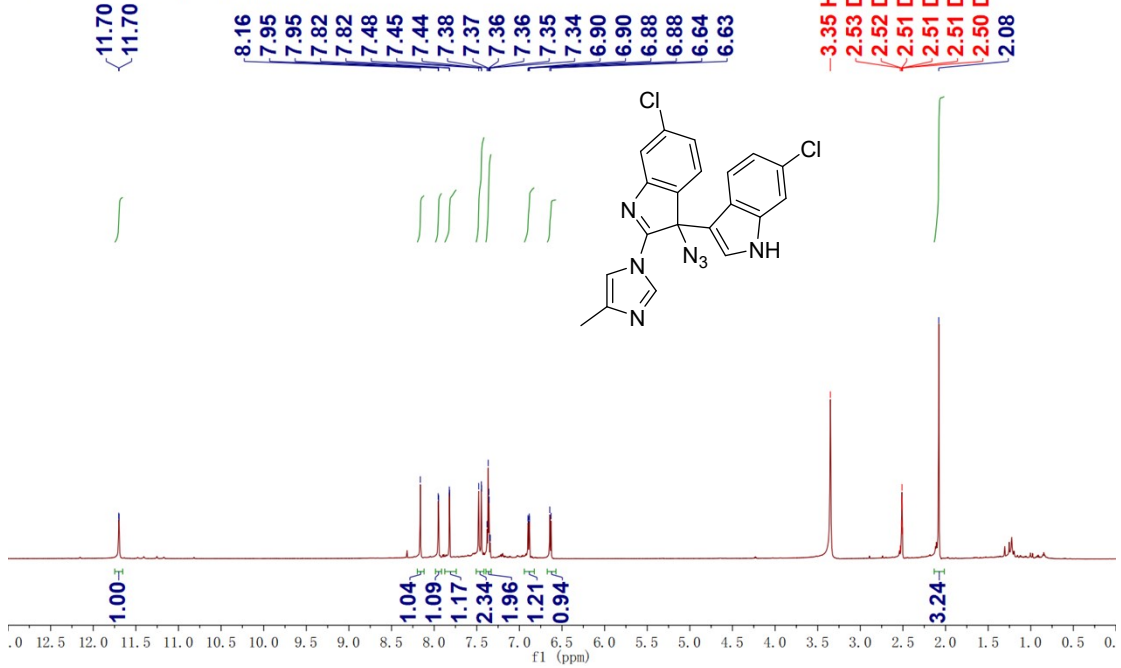

<sup>1</sup>H-NMR (600 MHz, DMSO) Spectra of compound **4k**

Sep22-2020-liuxiaoyu.22.fid  
 YUNNAN UNIVERSITY ASCEND AVIIIHD600 LX Y20200906A-4  
 Sep22-2020-liuxiaoyu  
 C13CPD DMSO {D:jinyi} jinyi 12

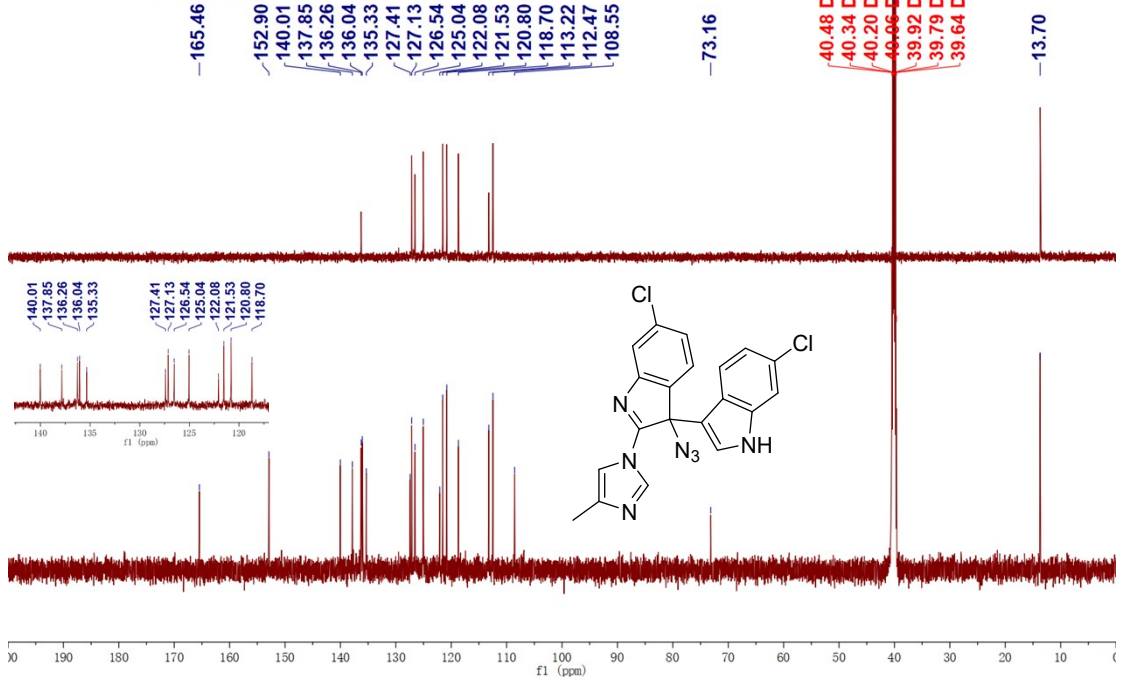

<sup>13</sup>C-NMR (151 MHz, DMSO) Spectra of compound **4k**

Sep24-2020-liuxiaoyu.21.fid  
 YUNNAN UNIVERSITY ASCEND AVIIIHD600 LX Y20200922  
 Sep24-2020-liuxiaoyu  
 PROTON DMSO {D:jinyi} jinyi 20

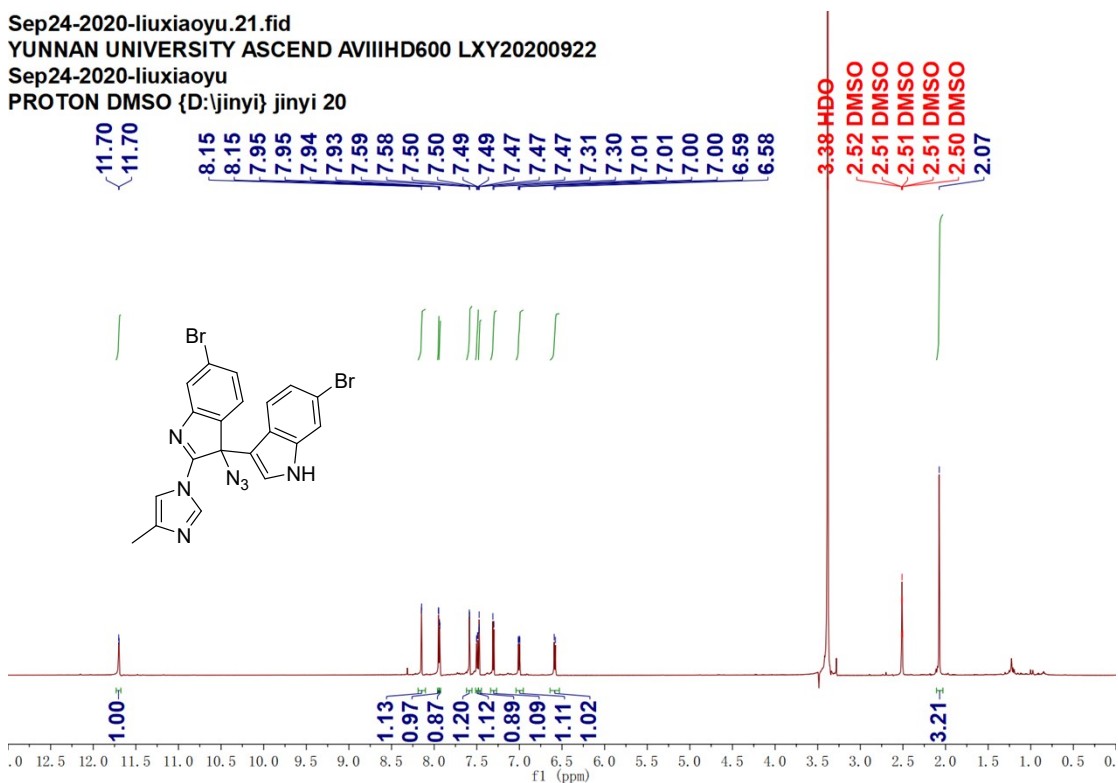

<sup>1</sup>H-NMR (600 MHz, DMSO) Spectra of compound 4I

Sep24-2020-liuxiaoyu.22.fid  
 YUNNAN UNIVERSITY ASCEND AVIIIHD600 LX Y20200922  
 Sep24-2020-liuxiaoyu  
 C13CPD DMSO {D:jinyi} jinyi 20

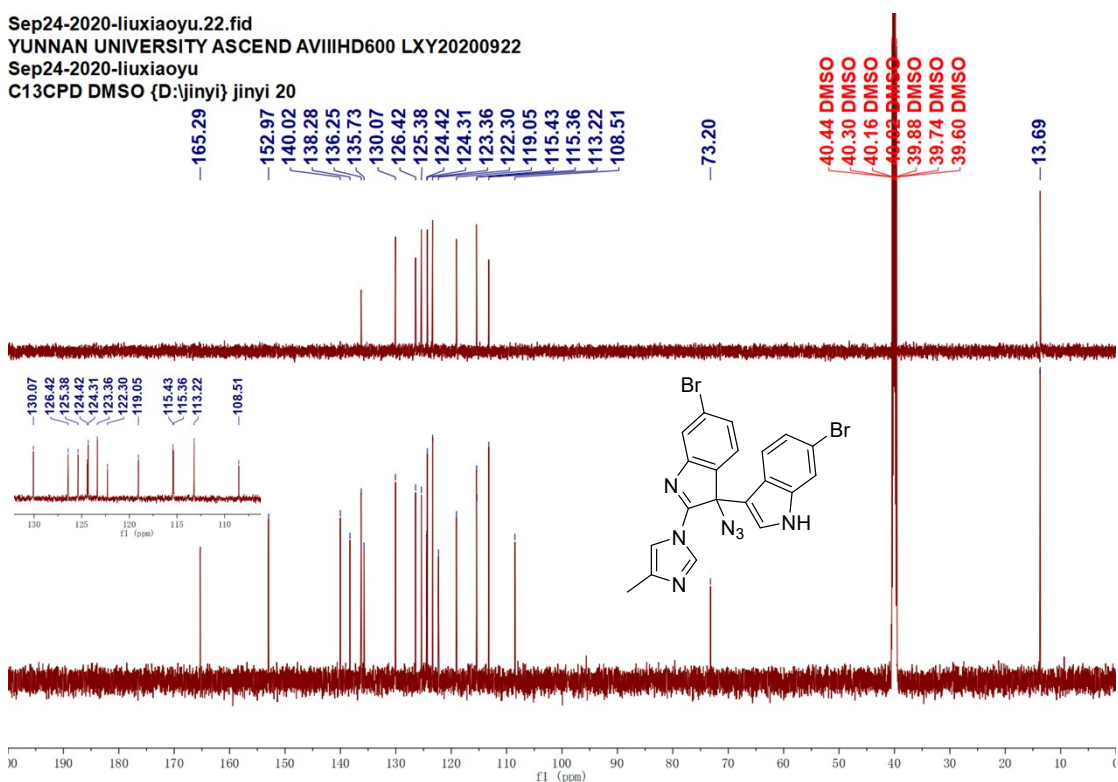

<sup>13</sup>C-NMR (151 MHz, DMSO) Spectra of compound 4I

Sep09-2020-liuxiaoyu.10.fid  
 YUNNAN UNIVERSITY ASCEND AVIIIHD600 LX Y20200907A  
 Sep09-2020-liuxiaoyu  
 PROTON DMSO {D:jinyi} jinyi 24

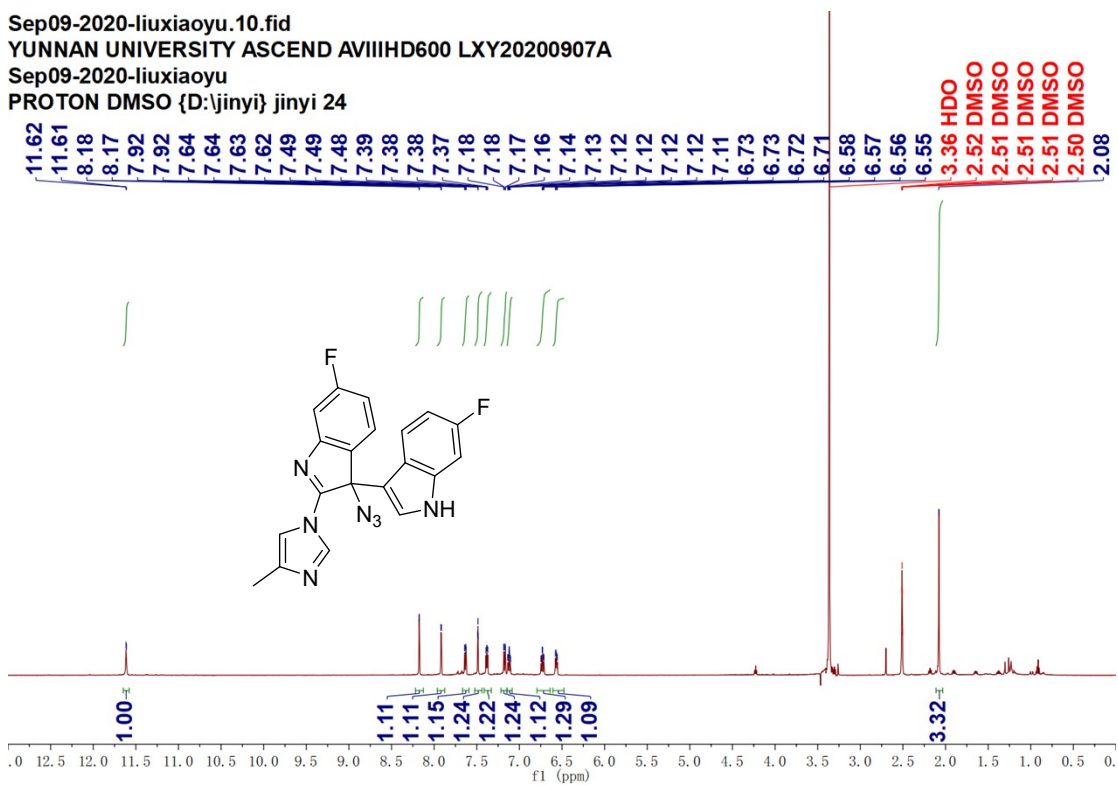

<sup>1</sup>H-NMR (600 MHz, DMSO) Spectra of compound 4m

Sep09-2020-liuxiaoyu.11.fid  
 YUNNAN UNIVERSITY ASCEND AVIIIHD600 LX Y20200907A  
 Sep09-2020-liuxiaoyu  
 C13CPD DMSO {D:jinyi} jinyi 24

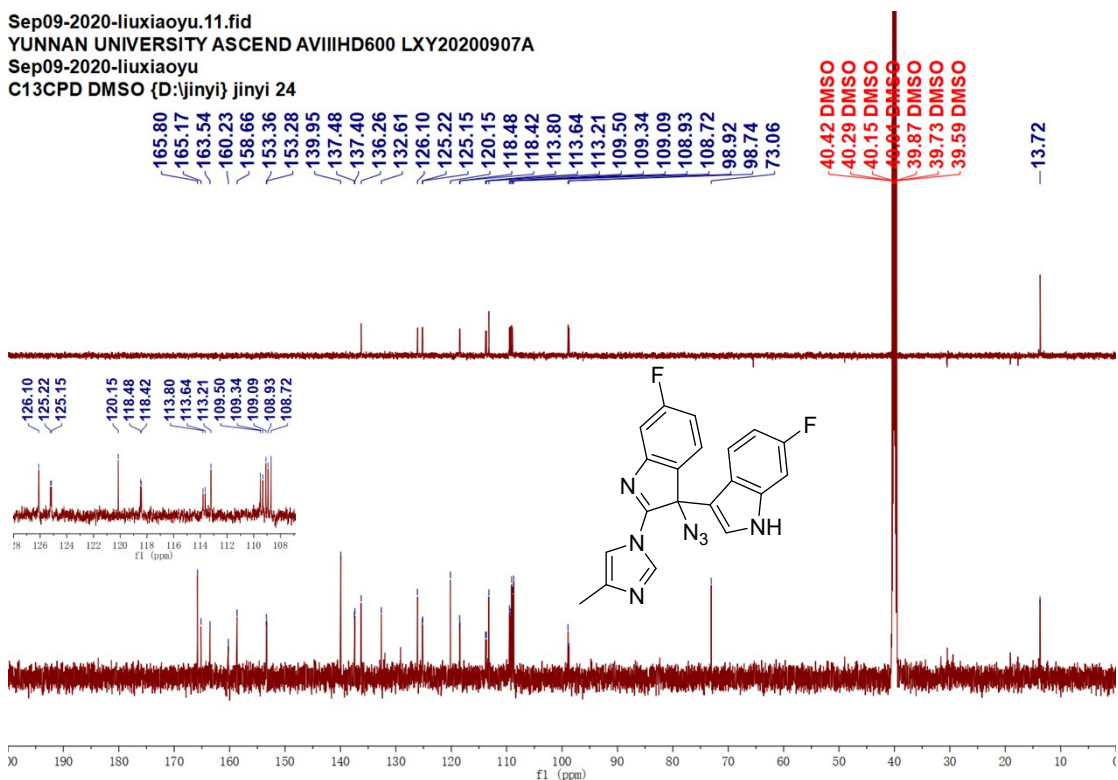

<sup>13</sup>C-NMR (151 MHz, DMSO) Spectra of compound 4m

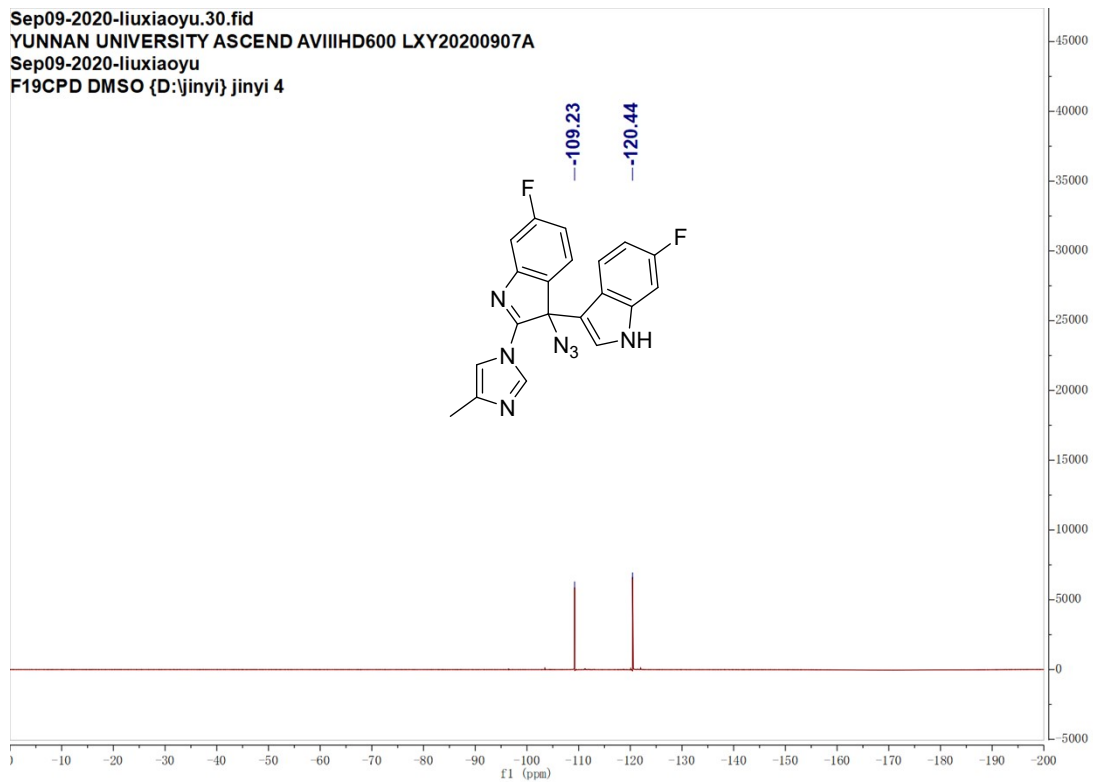

$^{19}\text{F}$ -NMR (565MHz, DMSO) spectrum of compound **4m**



Sep18-2020-liuxiaoyu.10.fid  
 YUNNAN UNIVERSITY ASCEND AVIIIHD600 LX-20200916  
 Sep18-2020-liuxiaoyu  
 PROTON DMSO {D:jinyi} jinyi 18

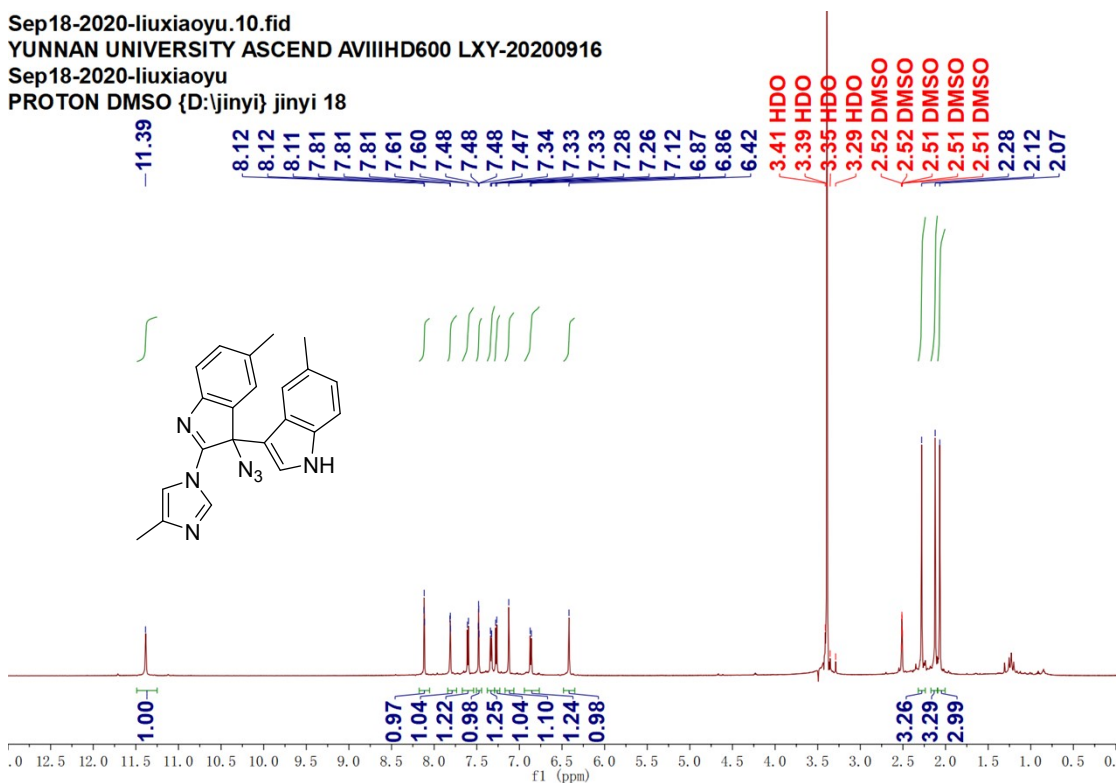

<sup>1</sup>H-NMR (600 MHz, DMSO) Spectra of compound **4n**

Sep18-2020-liuxiaoyu.11.fid  
 YUNNAN UNIVERSITY ASCEND AVIIIHD600 LX-20200916  
 Sep18-2020-liuxiaoyu  
 C13CPD DMSO {D:jinyi} jinyi 18

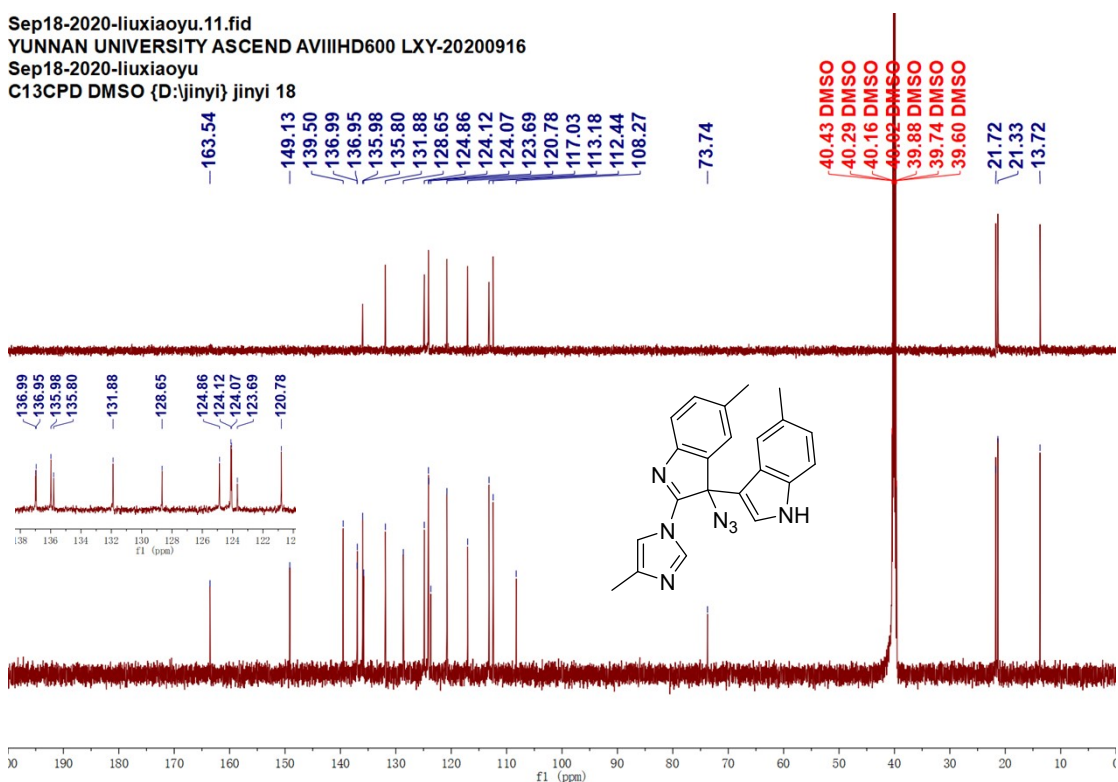

<sup>13</sup>C-NMR (151 MHz, DMSO) Spectra of compound **4n**

Sep25-2020-liuxiaoyu.10.fid  
 YUNNAN UNIVERSITY ASCEND AVIIIHD600 LX-20200923  
 Sep25-2020-liuxiaoyu  
 PROTON DMSO {D:jinyi} jinyi 3

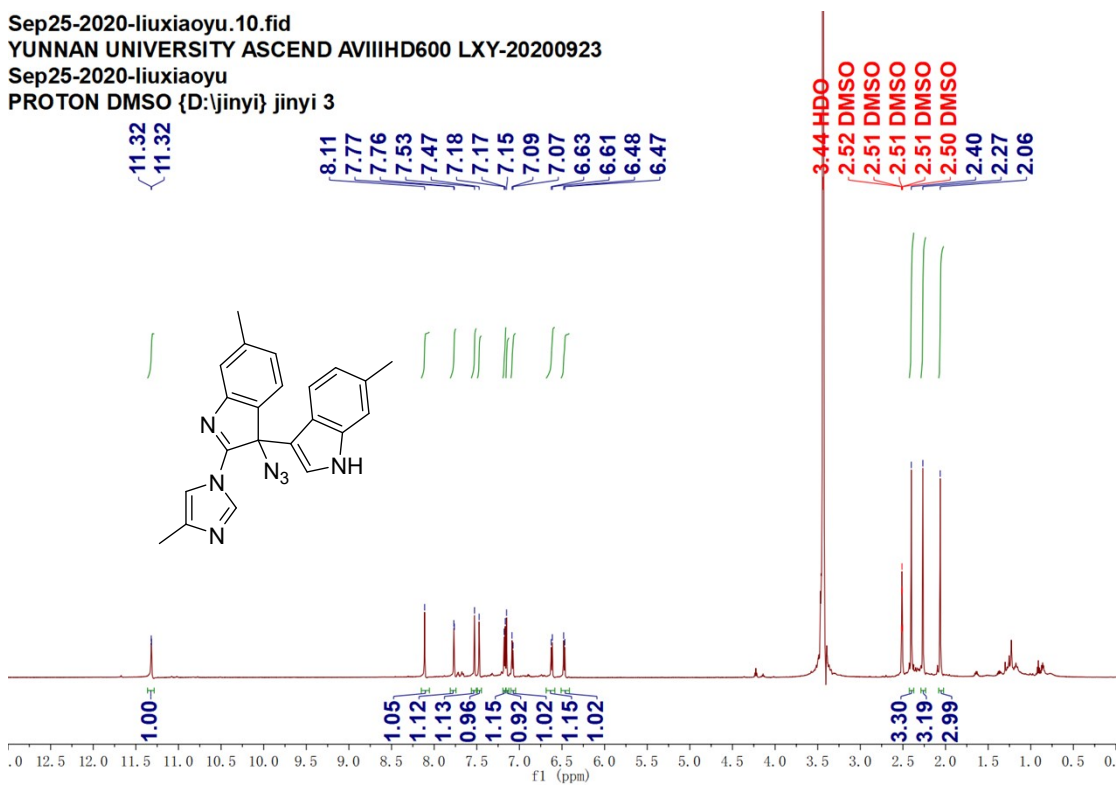

<sup>1</sup>H-NMR (600 MHz, DMSO) Spectra of compound **4o**

Sep25-2020-liuxiaoyu.12.fid  
 YUNNAN UNIVERSITY ASCEND AVIIIHD600 LX-20200923  
 Sep25-2020-liuxiaoyu  
 C13CPD DMSO {D:jinyi} jinyi 3

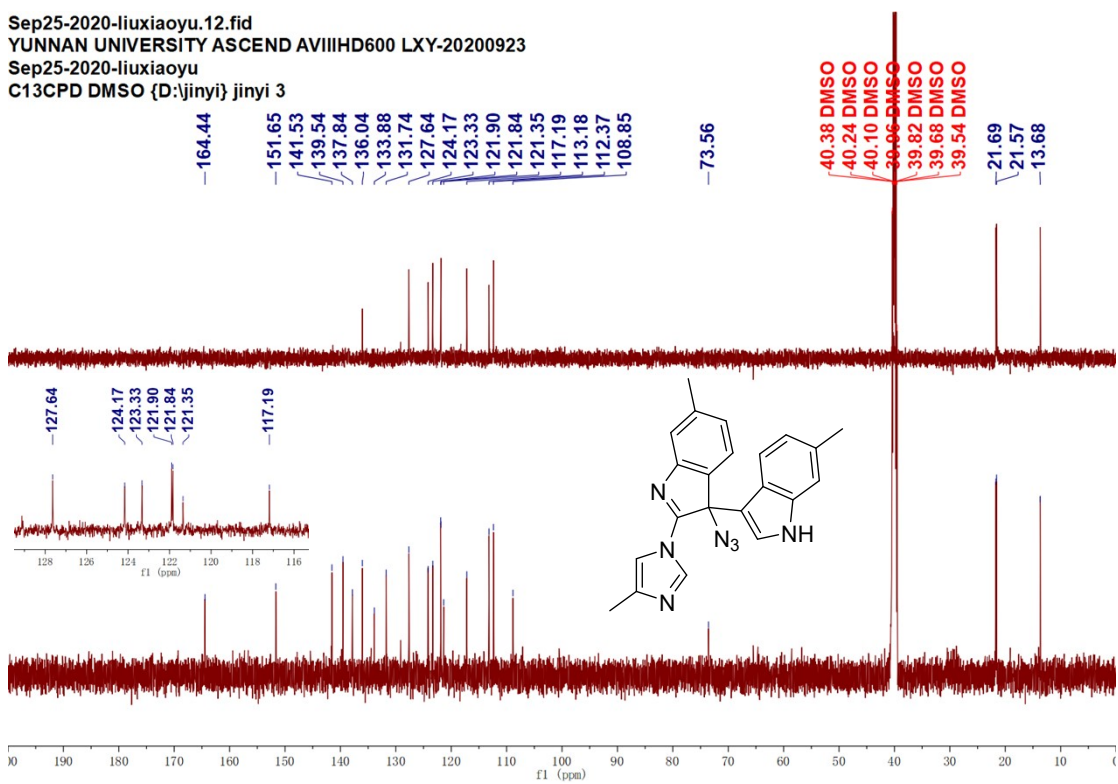

<sup>13</sup>C-NMR (151 MHz, DMSO) Spectra of compound **4o**

Sep15-2020-liuxiaoyu.30.fid  
YUNNAN UNIVERSITY ASCEND AVIIIHD600 LX Y20200906B-3  
Sep15-2020-liuxiaoyu  
PROTON DMSO {D:jinyi} jinyi 22

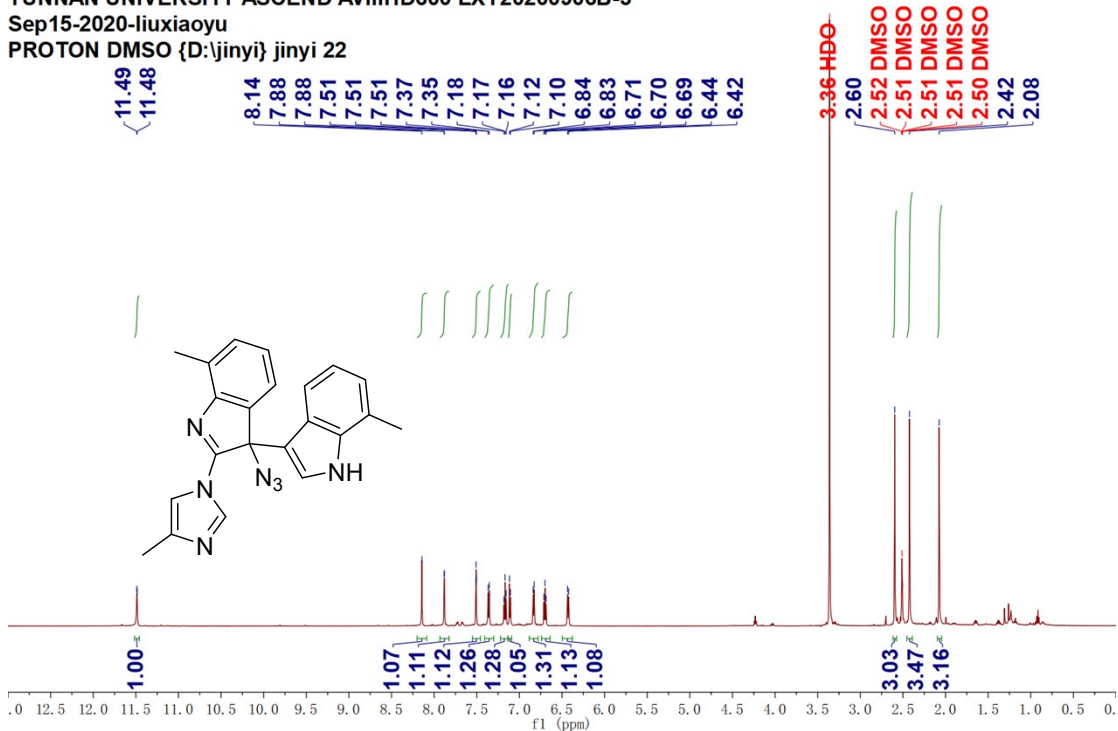

<sup>1</sup>H-NMR (600 MHz, DMSO) Spectra of compound 4p

Sep15-2020-liuxiaoyu.31.fid  
YUNNAN UNIVERSITY ASCEND AVIIIHD600 LX Y20200906B-3  
Sep15-2020-liuxiaoyu  
C13CPD DMSO {D:jinyi} jinyi 22

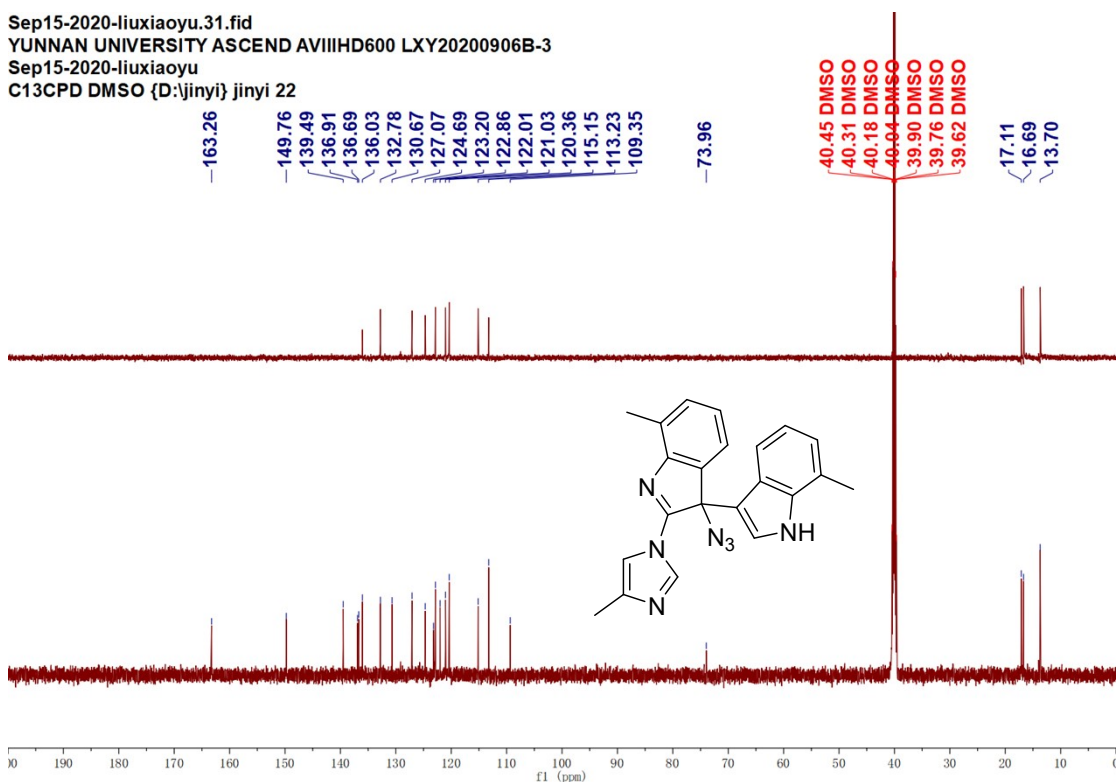

<sup>13</sup>C-NMR (151 MHz, DMSO) Spectra of compound 4p

Sep04-2020-liuxiaoyu.10.fid  
 YUNNAN UNIVERSITY ASCEND AVIIIHD600 LX20200902  
 Sep04-2020-liuxiaoyu  
 PROTON DMSO {D:ljinyi} jinyi 11

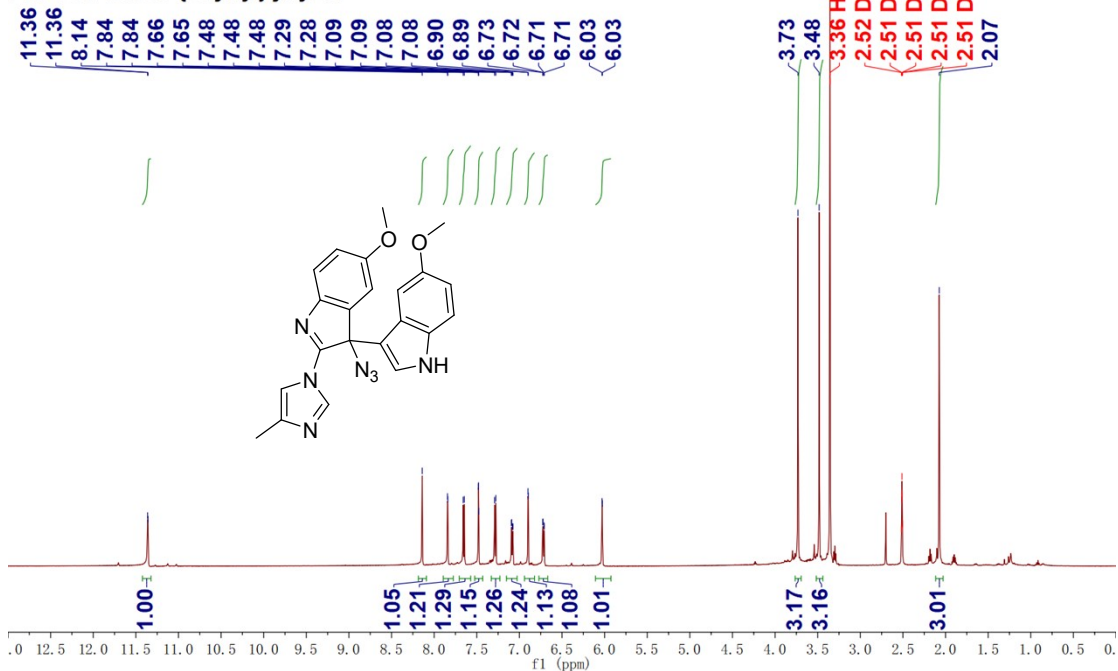

<sup>1</sup>H-NMR (600 MHz, DMSO) Spectra of compound **4q**

Sep04-2020-liuxiaoyu.11.fid  
 YUNNAN UNIVERSITY ASCEND AVIIIHD600 LX20200902  
 Sep04-2020-liuxiaoyu  
 C13CPD DMSO {D:ljinyi} jinyi 11

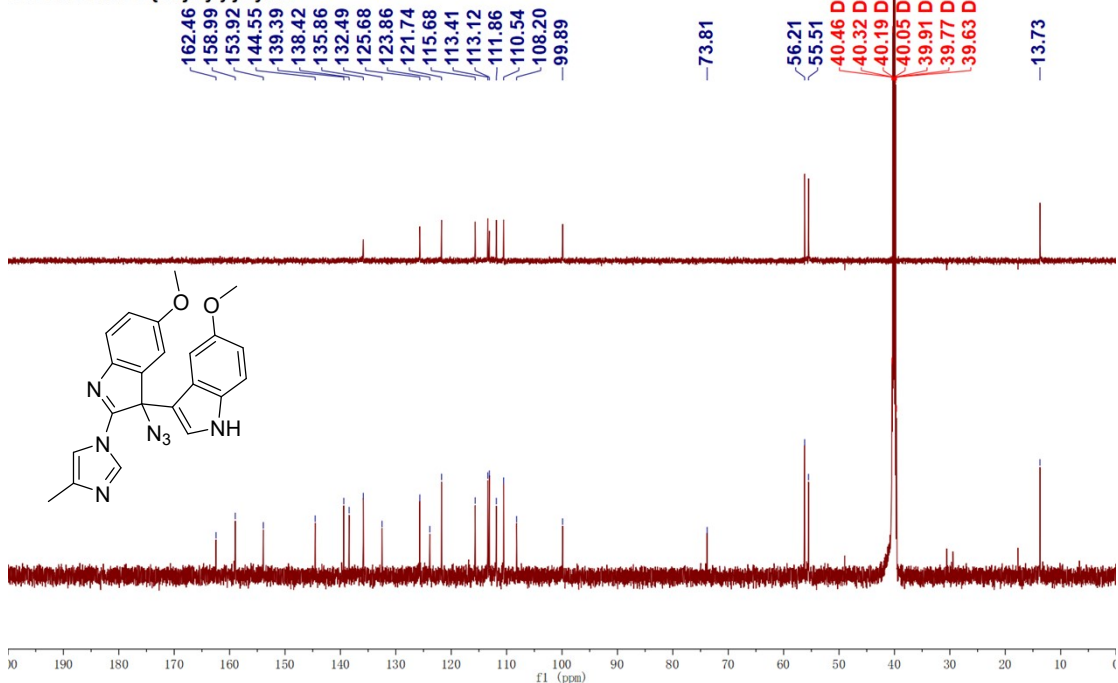

<sup>13</sup>C-NMR (151 MHz, DMSO) Spectra of compound **4q**

Jul23-2020-liuxiaoyu.40.fid  
YUNNAN UNIVERSITY ASCEND AVIIIHD600 LX Y20200722  
PROTON DMSO {D:jinyi} jinyi 16

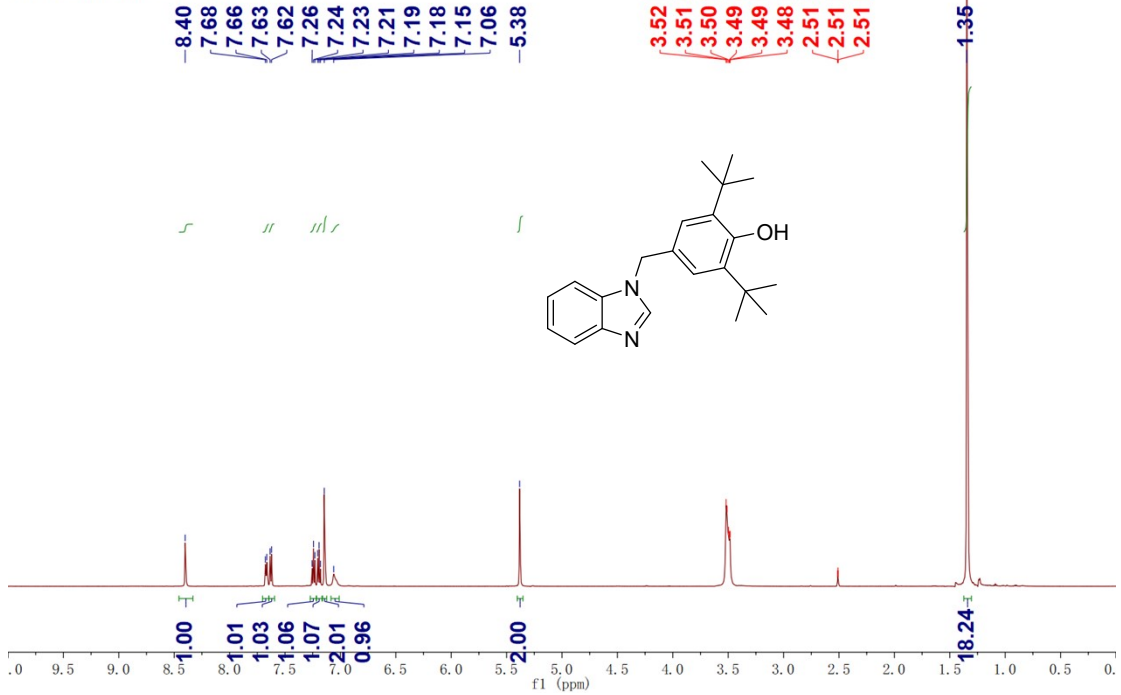

<sup>1</sup>H-NMR (600 MHz, DMSO) Spectra of compound 5

Jul23-2020-liuxiaoyu.41.fid  
YUNNAN UNIVERSITY ASCEND AVIIIHD600 LX Y20200722  
C13CPD DMSO {D:jinyi} jinyi 16

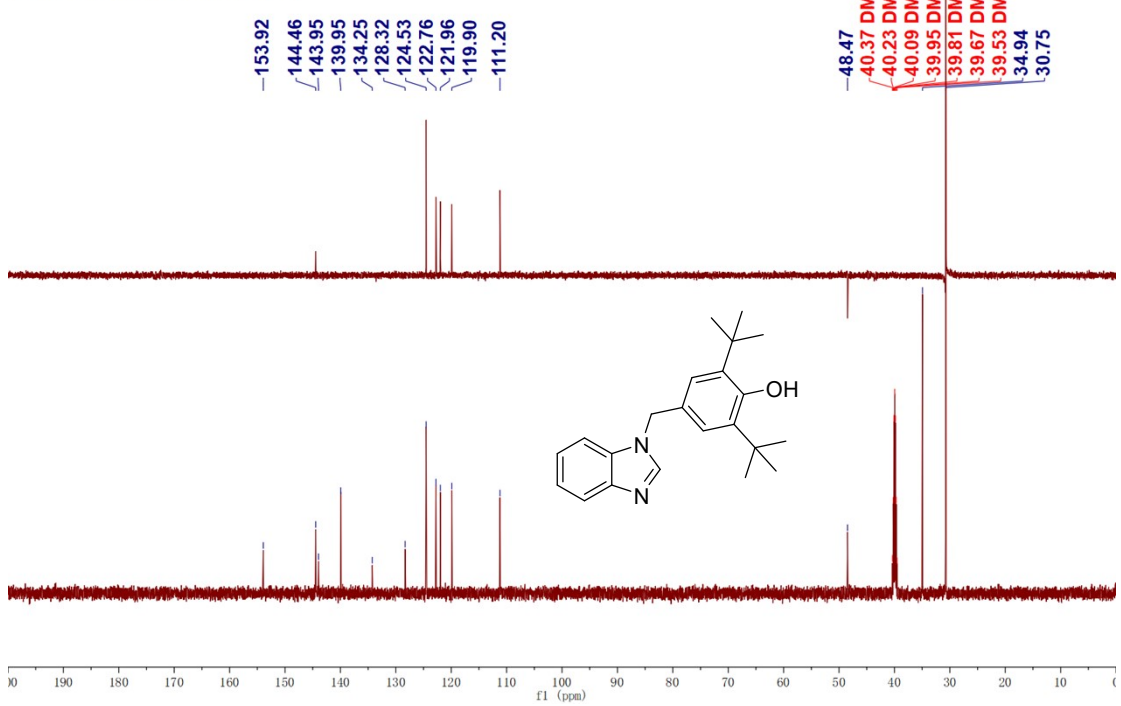

<sup>13</sup>C-NMR (151 MHz, DMSO) Spectra of compound 5

Oct22-2020-liuxiaoyu.40.fid  
 YUNNAN UNIVERSITY ASCEND AVIIIHD600 LX Y20201021  
 Oct22-2020-liuxiaoyu  
 PROTON DMSO {D:jinyi} jinyi 4

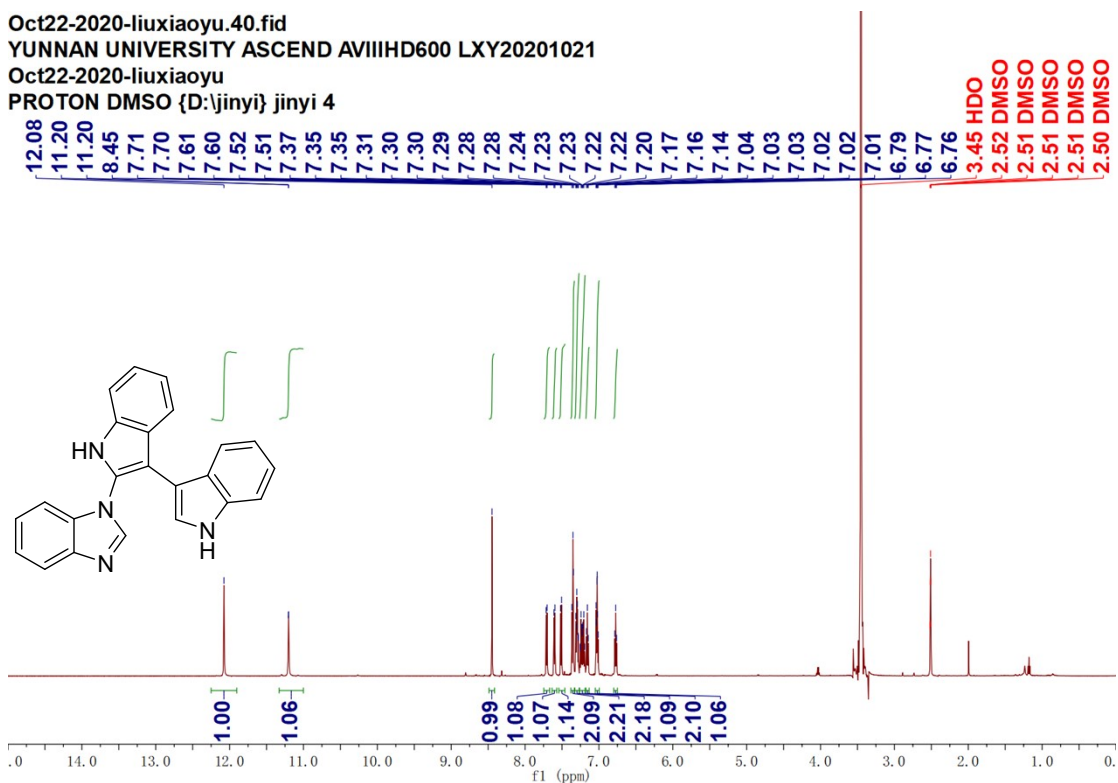

<sup>1</sup>H-NMR (600 MHz, DMSO) Spectra of compound 6

Oct22-2020-liuxiaoyu.41.fid  
 YUNNAN UNIVERSITY ASCEND AVIIIHD600 LX Y20201021  
 Oct22-2020-liuxiaoyu  
 C13CPD DMSO {D:jinyi} jinyi 4

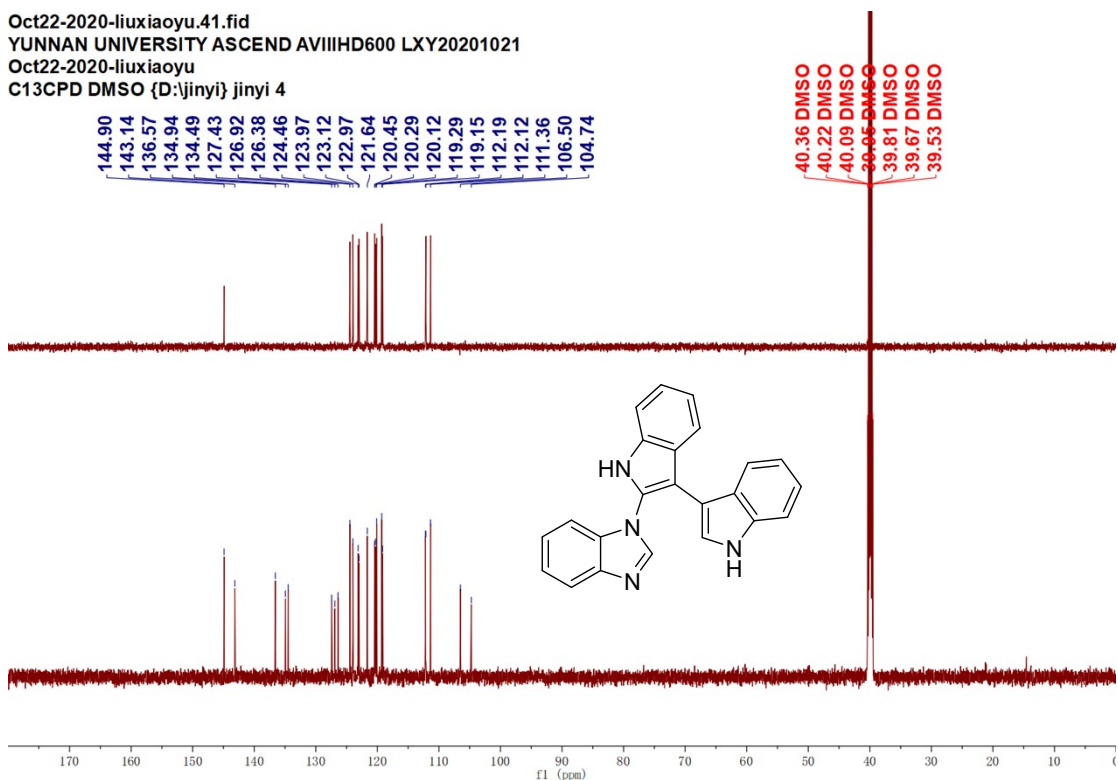

<sup>13</sup>C-NMR (151 MHz, DMSO) Spectra of compound 6

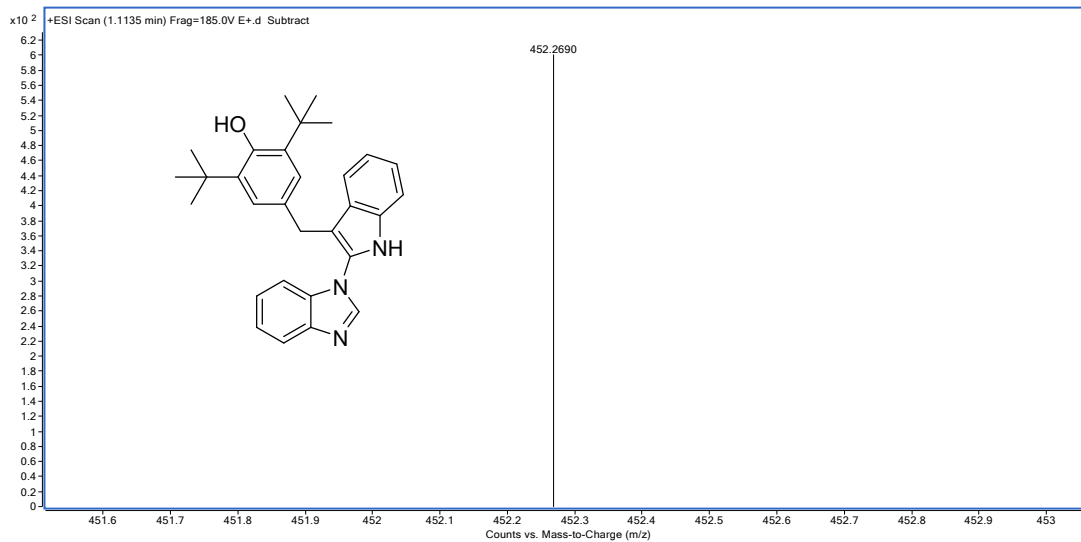

HRMS spectrum of compound 7

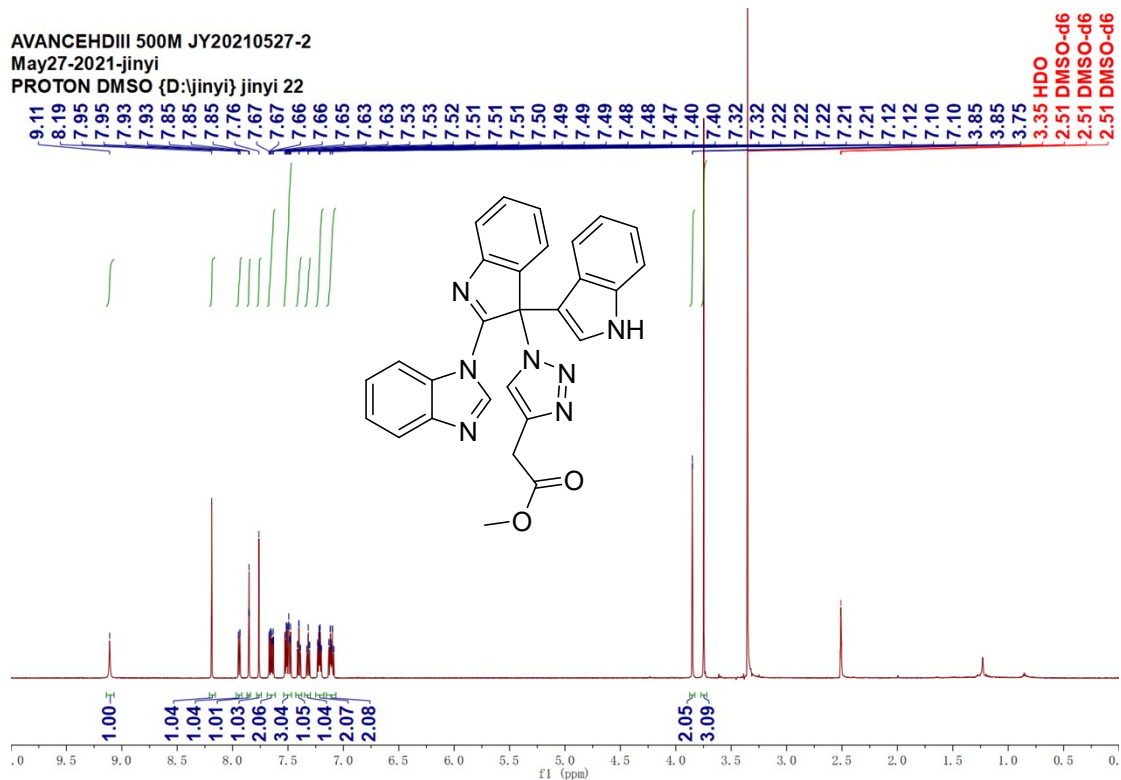

<sup>1</sup>H-NMR (600 MHz, DMSO) Spectra of compound 8

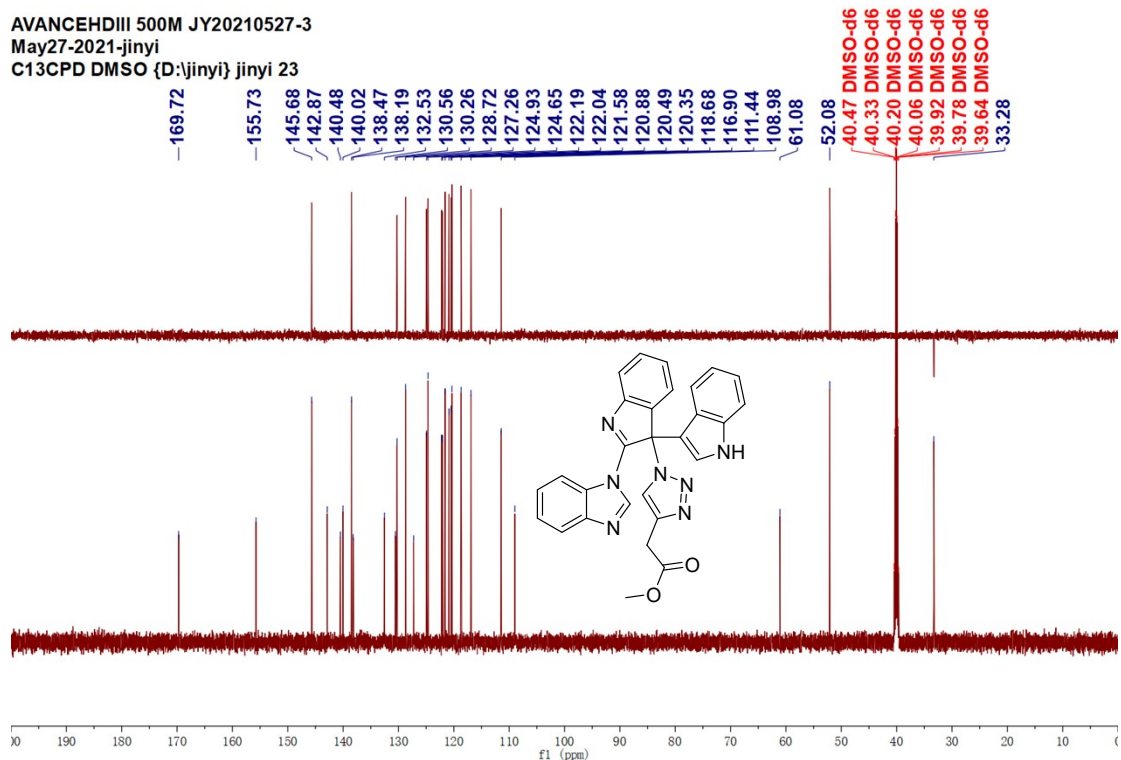

<sup>13</sup>C-NMR (151 MHz, DMSO) Spectra of compound 8
